# Supplementary material for: Chest radiograph findings in children aged 2–59 months hospitalised with community-acquired pneumonia, prior to the introduction of pneumococcal conjugate vaccine in India: a prospective multisite observational study
Source: PubMed Central journal article supplement (PMC7228527; doi:10.1136/bmjopen-2019-034066), 2020-05-07
Supplement: bmjopen-2019-034066.draft_revisions.pdf [file bmjopen-2019-034066.draft_revisions.pdf]

# BMJ Open

BMJ Open is committed to open peer review. As part of this commitment we make the peer review history of every article we publish publicly available.

When an article is published we post the peer reviewers' comments and the authors' responses online. We also post the versions of the paper that were used during peer review. These are the versions that the peer review comments apply to.

The versions of the paper that follow are the versions that were submitted during the peer review process. They are not the versions of record or the final published versions. They should not be cited or distributed as the published version of this manuscript.

BMJ Open is an open access journal and the full, final, typeset and author-corrected version of record of the manuscript is available on our site with no access controls, subscription charges or pay-per-view fees (<http://bmjopen.bmj.com>).

If you have any questions on BMJ Open's open peer review process please email [info.bmjopen@bmj.com](mailto:info.bmjopen@bmj.com)

# BMJ Open

## Chest Radiograph Findings in children aged 2-59 months hospitalized with Community-Acquired Pneumonia, prior to the introduction of Pneumococcal Conjugate Vaccine in India

|                               |                                                                                                                                                                                                                                                                                                                                                                                                                                                                                                                                                                                                                                                                                                                                                                                                                                           |
|-------------------------------|-------------------------------------------------------------------------------------------------------------------------------------------------------------------------------------------------------------------------------------------------------------------------------------------------------------------------------------------------------------------------------------------------------------------------------------------------------------------------------------------------------------------------------------------------------------------------------------------------------------------------------------------------------------------------------------------------------------------------------------------------------------------------------------------------------------------------------------------|
| Journal:                      | <i>BMJ Open</i>                                                                                                                                                                                                                                                                                                                                                                                                                                                                                                                                                                                                                                                                                                                                                                                                                           |
| Manuscript ID                 | bmjopen-2019-034066                                                                                                                                                                                                                                                                                                                                                                                                                                                                                                                                                                                                                                                                                                                                                                                                                       |
| Article Type:                 | Original research                                                                                                                                                                                                                                                                                                                                                                                                                                                                                                                                                                                                                                                                                                                                                                                                                         |
| Date Submitted by the Author: | 05-Sep-2019                                                                                                                                                                                                                                                                                                                                                                                                                                                                                                                                                                                                                                                                                                                                                                                                                               |
| Complete List of Authors:     | Awasthi, Shally; King George's Medical University, Pediatrics<br>Rastogi, Tuhina; King George's Medical University, Paediatrics<br>Mishra, Neha; King George's Medical University, Pediatrics<br>Chauhan, Abhishek ; Dr Ram Manohar Lohia Institute of Medical Sciences, Department of Radio-diagnosis<br>Mohindra, Namita; Sanjay Gandhi Post Graduate Institute of Medical Sciences, Department of Radio-diagnosis<br>Shukla, Ram ; Banaras Hindu University, Varanasi, India, Institute of Medical Sciences<br>Agarwal, Monica; King George's Medical University, Department of Community Medicine<br>Pandey, CM; Sanjay Gandhi Post Graduate Institute of Medical Sciences, Biostatistics & Health Informatics<br>Kohli, Neera ; King George's Medical University, Department of Radio-diagnosis<br>Study Group, CAP; CAP study Group |
| Keywords:                     | Chest radiographs, Hospitalized community-acquired pneumonia, under-five, Streptococcus pneumoniae, India                                                                                                                                                                                                                                                                                                                                                                                                                                                                                                                                                                                                                                                                                                                                 |
|                               |                                                                                                                                                                                                                                                                                                                                                                                                                                                                                                                                                                                                                                                                                                                                                                                                                                           |

SCHOLARONE™  
Manuscripts

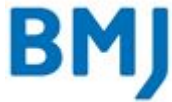

I, the Submitting Author has the right to grant and does grant on behalf of all authors of the Work (as defined in the below author licence), an exclusive licence and/or a non-exclusive licence for contributions from authors who are: i) UK Crown employees; ii) where BMJ has agreed a CC-BY licence shall apply, and/or iii) in accordance with the terms applicable for US Federal Government officers or employees acting as part of their official duties; on a worldwide, perpetual, irrevocable, royalty-free basis to BMJ Publishing Group Ltd ("BMJ") its licensees and where the relevant Journal is co-owned by BMJ to the co-owners of the Journal, to publish the Work in this journal and any other BMJ products and to exploit all rights, as set out in our [licence](#).

The Submitting Author accepts and understands that any supply made under these terms is made by BMJ to the Submitting Author unless you are acting as an employee on behalf of your employer or a postgraduate student of an affiliated institution which is paying any applicable article publishing charge ("APC") for Open Access articles. Where the Submitting Author wishes to make the Work available on an Open Access basis (and intends to pay the relevant APC), the terms of reuse of such Open Access shall be governed by a Creative Commons licence – details of these licences and which [Creative Commons](#) licence will apply to this Work are set out in our licence referred to above.

Other than as permitted in any relevant BMJ Author's Self Archiving Policies, I confirm this Work has not been accepted for publication elsewhere, is not being considered for publication elsewhere and does not duplicate material already published. I confirm all authors consent to publication of this Work and authorise the granting of this licence.

1  
2  
3  
4 Title: *Chest Radiograph Findings in children aged 2-59*  
5 *months hospitalized with Community-Acquired Pneumonia,*  
6 *prior to the introduction of Pneumococcal Conjugate Vaccine*  
7 *in India*  
8  
9  
10

11  
12  
13 Short Title: *Radiological Findings in Children hospitalized*  
14 *with Community-Acquired Pneumonia in India Pre-*  
15 *Pneumococcal Conjugate Vaccine introduction*  
16  
17  
18  
19

20  
21 **Shally Awasthi<sup>1\*</sup>, Tuhina Rastogi<sup>1</sup>, Neha Mishra<sup>1</sup>, Abhishek**  
22 **Chauhan<sup>2</sup>, Namita Mohindra<sup>3</sup>, Ram Chandra Shukla<sup>4</sup>, Monica**  
23 **Agarwal<sup>5</sup>, Chandra Mani Pandey<sup>6</sup>, Neera Kohli<sup>7</sup> and CAP Group<sup>^</sup>**  
24  
25  
26  
27

28 <sup>1</sup> Department of Pediatrics, King George's Medical University, Lucknow, India

29 <sup>2</sup> Department of Radio-diagnosis, Dr Ram Manohar Lohia Institute of Medical Sciences,  
30 Lucknow, India

31 <sup>3</sup> Department of Radio-diagnosis, Sanjay Gandhi Post Graduate Institute of Medical Sciences,  
32 Lucknow, India

33 <sup>4</sup>Department of Radio-diagnosis, Institute of Medical Sciences, Banaras Hindu University,  
34 Varanasi, India

35 <sup>5</sup> Department of Community Medicine, King George's Medical University, Lucknow, India

36 <sup>6</sup>Department of Biostatistics and Health Informatics, Sanjay Gandhi Postgraduate  
37 Institute of Medical Sciences, Lucknow, India

38 <sup>7</sup>Department of Radio-diagnosis, King George's Medical University, Lucknow, India  
39  
40  
41  
42

43  
44 <sup>^</sup> Members of the Lucknow CAP Group are given in the Acknowledgement  
45

46 \*Corresponding Author

47 Postal Address: Prof. Shally Awasthi, Head, Department of Paediatrics, King George's Medical  
48 University, Lucknow, India Pincode: 226003

49 Mobile: +91-9839221244

50 E-mail: shally07@gmail.com  
51  
52  
53

54 Word Count: 3587    Tables: 3    Figure: 1  
55  
56  
57

## ABSTRACT

**Objectives:** To assess radiological abnormalities in chest X-rays and to identify the demographic and clinical correlates in children aged 2-59 months, hospitalized with World Health Organization defined community-acquired pneumonia, who reside in pre-specified districts of India

**Design:** Prospective, hospital-based surveillance

**Setting:** Multi-site study conducted in a network of 117 secondary/tertiary care hospitals in four districts of Uttar Pradesh and Bihar, India.

**Participants:** Included were children aged 2-59 months hospitalized with community-acquired pneumonia, residing in project district, with duration of illness of <14 days and who were not hospitalized elsewhere for this episode or nor had been recruited previously.

**Main outcome measure:** Radiological abnormalities in the chest X-rays, where there was concordance between two or more of the panel of three trained radiologists.

**Results:** From January 2015 to April 2017, 3214 cases were recruited and in 99.40 % (3195/3214) chest X-rays were available. Among 88.54 % (2829/3195) interpretable X-rays, 34.53 % (977/ 2829, 95% C.I. 32.78 - 36.28) had some radiological abnormalities, while the rest were normal. Primary end point pneumonia alone or with other infiltrates was found in 22.44 % (635/2829, C.I. 20.90 %-23.98 %), other infiltrates only in 12.09% (342/ 2829; C.I. 10.88 %-13.29 %). There was a statistically significant inter-district variation in radiological abnormality. Statistically significantly higher proportion of abnormal chest X-ray was found among girls, those with weight for age z score  $\leq -3$  SD, longer duration of fever, pallor and with exposure to biomass fuel.

1  
2  
3 **Conclusions:** Among hospitalized cases of community-acquired pneumonia, almost one-third  
4 children had abnormal chest radiographs of which about two-thirds had abnormalities related  
5 with possible bacterial etiology (*Streptococcus pneumoniae*). Hence introduction of  
6 pneumococcal vaccination is likely to reduce burden of childhood pneumonia in India.  
7  
8  
9  
10  
11  
12  
13

14 **Key words:** Chest radiographs, Hospitalized community-acquired pneumonia, under-five,  
15 *Streptococcus pneumoniae*, India  
16  
17  
18  
19

## 20 **Strengths and Limitations of the Study**

21  
22

- 23 • Prospective, multisite recruitments from a large hospital surveillance network established for  
24 the project in four districts in two states of India that have high under-five mortality rates  
25
- 26 • Standardized World Health Organization definition was used for identifying hospitalized  
27 cases of clinical pneumonia  
28
- 29 • Radiological abnormalities interpreted by a panel of three trained radiologists at locations out  
30 of the surveillance network, blinded to each other as well as clinical features of the case  
31
- 32 • Since pre-existing X-rays machines were used, there was variation in the quality of images  
33 obtained, which were minimized by digitizing them centrally  
34
- 35 • Laboratory investigations were according to the routine hospital practice and were not  
36 uniform across hospitals, since the study objective was to assess radiological abnormalities in  
37 chest X-rays of recruited cases .  
38  
39  
40  
41  
42  
43  
44  
45  
46  
47  
48  
49  
50  
51  
52  
53  
54  
55  
56  
57  
58  
59  
60

## INTRODUCTION

Community-acquired pneumonia (CAP) is the single largest infectious cause of death in young children worldwide. Globally, pneumonia accounts for 16% of deaths in children under-five years of age and results in almost one million deaths (0.9 million children in 2016) every year<sup>1-2</sup>. Most deaths due to pneumonia occur in low and middle income countries particularly in sub-Saharan Africa and South Asia<sup>2-3</sup>. In India, there were approximately 0.44 million under-five deaths due to CAP in the year 2015<sup>4</sup>.

CAP could have viral or bacterial etiology<sup>5-7</sup>. Etiology varies from country to country and also across different time periods. Pediatric bacterial pneumonia is predominantly caused by *Streptococcus pneumoniae* (SP) and *Hemophilus influenzae Type B* (HiB) while Respiratory syncytial virus and Influenza A or B virus are important contributors of pediatric viral pneumonia<sup>5-6</sup>. The World Health Organization (WHO) recommends the introduction of Pneumococcal Conjugate Vaccine (PCV) in the national immunization programme (NIP) of countries with high child mortality rates, which includes India<sup>8</sup>. Consequently, PCV-13 was launched in May 2017 under the NIP of five Indian states (Uttar Pradesh, Bihar, Rajasthan, Madhya Pradesh and Himachal Pradesh) in a phased manner<sup>9</sup>. It is expected to be rolled out in other parts of the country in the coming days. Vaccination against HiB is already under the NIP since 2011.

Differentiating bacterial from viral etiology of CAP on clinical features or by investigations remains difficult<sup>7-10-11</sup>. Several PCV probe trials have used radiographically confirmed alveolar

1  
2  
3 pneumonia, also called end-point pneumonia, to be an outcome for vaccine efficacy and this has  
4  
5 been endorsed by WHO <sup>12-14</sup>.  
6  
7  
8  
9

10 The current study was a hospital-based surveillance to assess the radiological abnormalities in  
11 chest X-rays (CXRs) and to identify the demographic clinical correlates of specific radiological  
12 abnormalities in children aged 2-59 months, hospitalized with WHO defined CAP, residing in  
13 pre-specified districts of Uttar Pradesh and Bihar, India.  
14  
15  
16  
17  
18  
19  
20  
21

## 22 **METHODS**

### 23 **Setting**

24  
25 This multi-site site prospective study was conducted in Lucknow and Etawah districts of Uttar  
26 Pradesh and Patna & Darbhanga districts of Bihar, India. Uttar Pradesh is the most populated  
27 state of India and Bihar third populated <sup>15 16</sup>. Lucknow district has urban population of 66.2% <sup>15</sup>  
28 and Patna district 43.07% <sup>16</sup>. In contrast, only 22.3%<sup>15</sup> population of Etawah district and 9.74%<sup>16</sup>  
29 population of Darbhanga district reside in rural areas. All four project districts have poor socio-  
30 demographic and child health indicators <sup>15 16 17</sup>.  
31  
32  
33  
34  
35  
36  
37  
38  
39  
40

### 41 **Study Population**

42 A hospital-based surveillance system was established for this study. Recruitment was done from  
43 a network of public and private hospitals, which provided either secondary or tertiary level care,  
44 which admitted children. Children aged 2-59 months hospitalized in network hospitals with  
45 history of fast breathing with/without chest in-drawing were screened <sup>17</sup>.  
46  
47  
48  
49  
50  
51  
52  
53  
54  
55  
56  
57  
58  
59  
60



1  
2  
3 Children with cough and respiratory symptoms for  $\geq 14$  days were excluded <sup>17</sup>. Children with  
4 history of hospitalization within 14 days of recruitment were excluded to remove the potential  
5 risk of acquiring hospital-acquired pneumonia <sup>17</sup>. Included were children hospitalized with  
6 symptoms of WHO defined CAP and residing in the project district. WHO has developed  
7 guidelines for the identification of CAP by the community health workers <sup>18</sup>. According to these  
8 guidelines, CAP is defined as the presence of fast breathing above age-specific cutoff. The  
9 cutoff for infants less than 2 months is 60 more breaths per minute (bpm), for 2-11 months of age  
10 50 or more bpm and 12-59 months of age is 40 or more bpm <sup>18</sup>. In addition, WHO has defined  
11 severe pneumonia as CAP with presence of certain danger signs such as not able to drink,  
12 persistent vomiting, convulsions, lethargy or unconsciousness, stridor in a calm child or severe  
13 malnutrition <sup>18</sup>. Children with fast breathing with or without chest in-drawing are classified as  
14 “pneumonia” and children with pneumonia and with any danger signs are classified as “severe  
15 pneumonia” <sup>18</sup>.  
16  
17  
18  
19  
20  
21  
22  
23  
24  
25  
26  
27  
28  
29  
30  
31  
32

### 33 **Data collection**

34  
35 Information on socio-demographic and clinical variables was obtained by trained surveillance  
36 officers. Socio-demographic information was collected through face-to-face interviews from the  
37 parent/caregiver of the recruited child. Clinical data and anthropometric information (height,  
38 weight, mid-arm circumference and head circumference) was abstracted from clinical records of  
39 admitting hospital. Clinical Outcome (survival or mortality) was noted <sup>17 19</sup>.  
40  
41  
42  
43  
44  
45  
46

### 47 **Chest x-ray (CXR) image acquisition and archiving**

48  
49 CXR (poster-anterior view) was done on the advice of treating physician as part of routine  
50 clinical care. Surveillance staff obtained CXR at the time of recruitment. CXRs were either  
51 analogous or digital. In case of digital CXRs, second copy was obtained where possible. If only  
52  
53  
54  
55  
56  
57  
58  
59  
60

1  
2  
3 single analog image was available, then the CXR hardcopy was obtained from the  
4  
5 parent/guardian after the child was discharged. If this could not be done, image of the hardcopy  
6  
7 was captured. CXR machines were not provided through the project.  
8  
9

10  
11  
12 CXRs of recruited cases were subsequently scanned and converted into digital format using a  
13  
14 diagnostic-quality film image digitalizer (Microteck International Limited, model Medi 6000  
15  
16 plus)<sup>20</sup>. CXRs obtained/converted into digital image were stored as per the standard operating  
17  
18 procedure and were subsequently archived for web-based radiological interpretation. Digital  
19  
20 images were stored in JPEG format at 300 dpi resolution. Each CXR file was anonymized and  
21  
22 given a unique identification number. Digital CXRs were uploaded on online data management  
23  
24 software ([www.capxrs.org](http://www.capxrs.org)), developed especially for the project. De-identified CXRs were  
25  
26 uploaded every month in batches by the data manager.  
27  
28  
29

### 30 31 **Interpretation of radiological images**

32  
33 A panel of radiologists was constituted for standardized interpretations of pediatric CXRs. Four  
34  
35 radiologists were part of this panel, one of whom was Project Co-Investigator-Radiology.  
36  
37 Radiologists were trained as per the methodology developed by Department of Immunization,  
38  
39 Vaccines, and Biologicals of the World Health Organization (WHO)<sup>11</sup>.  
40  
41  
42  
43  
44

45 After training, radiologists were required to independently review CXRs and register their  
46  
47 findings in an online standardized chest radiograph interpretation form [S1 Appendix]. For  
48  
49 optimal viewing of CXRs, all readers used similar workstations. Specifications were provided for  
50  
51 the computer monitor and hardware to be used. It was ensured that monitors had the correct  
52  
53  
54  
55  
56  
57  
58  
59  
60

1  
2  
3 brightness and contrast adjustment for optimal viewing. The sequence of presentation of CXR to  
4  
5 the readers was randomized.  
6  
7  
8  
9

10 Radiographic interpretation was done on film quality, findings of CXRs and conclusion.  
11 Radiologists interpreted film quality as follows: (a) *'Adequate/optimal'* for features allow  
12 confident interpretation of consolidation and pleural effusion as well as other infiltrates; (b)  
13 *'Suboptimal'* for features allow interpretation of consolidation and pleural effusion, but not of  
14 other infiltrates or findings and (c) *'Un-interpretable'* pertaining to features of the image that are  
15 not interpretable with respect to presence or absence of consolidation or pleural effusion without  
16 additional images <sup>12</sup>.  
17  
18  
19  
20  
21  
22  
23  
24  
25  
26  
27

28 After interpreting film quality, readers interpreted the pathological findings. For each  
29 radiographic finding, there were two options to be chosen: 'yes' for the presence of findings and  
30 'no' for its absence. Pathological findings were classified into (a) *'significant pathology'* such as  
31 presence of consolidation, infiltrates or effusion; (b) *'end-point consolidation'* for CXRs with a  
32 dense or confluent opacity that occupies a portion or whole of a lobe or the entire lung, that may  
33 or may not contain air bronchograms ; (c) *'other (non end-point) infiltrate'* for CXRs with linear  
34 and patchy opacities (interstitial infiltrate) in a lacy pattern, featuring peri-bronchial thickening  
35 and multiple areas of atelectasis; also including minor patchy infiltrates that are not of sufficient  
36 magnitude to constitute endpoint consolidation, and small areas of atelectasis that in children  
37 may be difficult to distinguish from consolidation and (d) *'pleural effusion'* on presence of fluid  
38 in the lateral pleural space between the lung and chest wall that is spatially associated with a  
39 pulmonary parenchymal infiltrate (including 'other infiltrate') or has obliterated enough of the  
40  
41  
42  
43  
44  
45  
46  
47  
48  
49  
50  
51  
52  
53  
54  
55  
56  
57  
58  
59  
60

1  
2  
3 hemithorax to obscure any infiltrate; in most cases, this will be seen at the costo-phrenic angle or  
4  
5 as a layer of fluid adjacent to the lateral chest-wall; this does not include fluid seen in the  
6  
7 horizontal or oblique fissures <sup>12</sup>.  
8  
9

10  
11  
12 Radiologists concluded their interpretations of CXRs as per WHO guidelines <sup>12</sup>. Conclusions  
13  
14 were categorised into: (a) '*Primary End Point Pneumonia only*' (PEP) on the presence of  
15  
16 consolidation or pleural effusion; (b) '*Other (non end-point) infiltrate only*' on the presence of  
17  
18 other (non-consolidation) infiltrates as defined above in the absence of a pleural effusion (c)  
19  
20 '*Both PEP and other infiltrate*' and (d) '*Normal*' when there were no findings consistent with  
21  
22 'endpoint consolidation' or 'other infiltrate' or 'pleural effusion' <sup>12</sup>.  
23  
24  
25  
26  
27

28  
29 After radiological interpretation, online data was archived, stored and checked for  
30  
31 inconsistencies and completeness by the data manager. CXRs with concordant and discordant  
32  
33 interpretations were identified. Interpretations were considered concordant when two or more  
34  
35 radiologists agreed on the same. If all the three radiologists disagreed on set of findings, then  
36  
37 such CXRs with discordant interpretations were forwarded to the study arbitrator (Project Co-  
38  
39 Investigator-Radiology) using customized software ([www.capxrs.org](http://www.capxrs.org)). Arbitrator read discordant  
40  
41 CXRs and submitted the interpretation to the data manager. Readings of arbitrator were taken as  
42  
43 final in case of discordant interpretations.  
44  
45  
46

### 47 **Data management and statistical analysis**

48

49  
50 Clinical data of hospital surveillance network was entered online in customized software.  
51  
52 Primary entry was by the four participating sites. Secondary data entry was done by the  
53  
54 coordinating site in different customized software. Anonymized CXRs were uploaded on  
55  
56  
57

1  
2  
3 customized software. Each of the three panelists had independent access to them. They assessed  
4 the CXRs online, blind to peer assessments as well as clinical features of the case, and uploaded  
5 their findings online. CXR assessment data was downloaded from the online software in MS  
6  
7  
8  
9  
10 Access database.

11  
12  
13  
14 Exploratory data analysis was performed for outlier detection and missing observations for all  
15 the variables. Descriptive statistics was calculated for measurable variables in Mean  $\pm$  Standard  
16 Deviation (M $\pm$ SD) and categorical variables in percent (%). Un-interpretable CXRs were  
17 removed from analysis. Among interpretable CXRs, radiological abnormalities, which were  
18 reported by two members of the panel, were taken as final. Weight-for-age z-score each child  
19 was calculated using Epi-Info software <sup>21</sup>. Weight-for-age z score (WAZ) of  $\leq -3$  was taken as  
20 `underweight` <sup>22</sup>. Kappa statistics was performed for agreement analysis among radiologists for  
21 CXRs findings. Statistical analysis was performed using SPSS version 22.0 (Chicago, IL) <sup>23</sup>. A p  
22 value of  $<0.05$  was taken as statistically significant using a two-tailed distribution.  
23  
24  
25  
26  
27  
28  
29  
30  
31  
32  
33  
34  
35  
36  
37

38 Univariate analysis was performed to evaluate heterogeneity stratified by four participating sites  
39 for socio-demographic variables such as age, gender, place of residence, type of house, type of  
40 family, maternal & paternal education and their occupation, use of biomass fuel for cooking and  
41 parental smoking status. Likewise, univariate analysis was done for clinical variables such as  
42 height, weight, duration of illness and percent oxygen saturation, in cases where pulse oximetry  
43 was done.  
44  
45  
46  
47  
48  
49  
50  
51  
52  
53  
54  
55  
56  
57  
58  
59  
60

1  
2  
3 We report proportions of radiological abnormalities among hospitalized children for CAP for  
4 four districts. Univariate analysis was performed to find out associated socio-demographic  
5 variables and clinical signs of CAP with radiological abnormalities. Chi-square test was used to  
6 find out association for categorical variables and student's t-test for continuous variables.  
7  
8 Multivariate binary logistic regression was performed find association of presence of various  
9 radiological abnormalities among cases hospitalized for CAP, controlling for district of residence  
10 and other variables that had univariate association with radiological abnormalities (p value  $\leq 0.2$ )  
11 and/or were clinically meaningful.  
12  
13  
14  
15  
16  
17  
18  
19  
20  
21  
22  
23

24 Thereafter, we developed and report four models for estimation of adjusted odds ratios of socio-  
25 demographic and clinical variables with specific radiological abnormalities (dependent variable).  
26  
27

28 In these four models, dependent (outcome) were as follows:  
29

30 Model I: Abnormal vs. Normal  
31

32 Model II: Primary End Point Pneumonia alone or with infiltrates vs. Normal  
33  
34

35 Model III: Primary End Point Pneumonia alone vs. Normal  
36  
37

38 Model IV: Other infiltrates only vs. Normal  
39  
40  
41

42 Independent variables that were kept across all the four models were : participating districts, age,  
43 gender, use of biomass fuel, symptoms of CAP such as duration of illness, presence of rhonchi,  
44 pallor and vomiting and malnutrition status of the case [ $WAZ \leq -2$  (malnourished) and  $WAZ \leq -$   
45 3 (severely malnourished)].  
46  
47  
48  
49  
50

## 51 **Patient and public involvement in research**

52  
53  
54  
55  
56  
57  
58  
59  
60

1  
2  
3 Health Ministry Steering Committee of Indian Council of Medical Research, New Delhi, India  
4  
5 approved the study. State governments of Uttar Pradesh and Bihar gave consent for initiating the  
6  
7 study. Written, informed consent was obtained from parents/guardians of eligible children who  
8  
9 were willing to participate in the study. Written informed consent was also taken from the  
10  
11 administration of hospital for participation.  
12  
13  
14  
15  
16

## 17 RESULTS

18  
19  
20 A total of 3290 hospitalized cases were screened in hospital surveillance network of Lucknow  
21  
22 and Etawah districts of Uttar Pradesh and Patna & Darbhanga districts of Bihar from January  
23  
24 2015 to April 2017. Out of these, 3214 cases fulfilling the WHO diagnosis of CAP were included  
25  
26 [Figure 1]. Among them, 3195 (99.40%) cases were enrolled with CXRs and in 19 (1.0%) cases  
27  
28 CXRs were not done. Concordance among  $\geq 2$  radiologists for CXRs findings was 86.0%. Kappa  
29  
30 statistics was calculated for agreement of CXRs findings between Reader 1 vs. Reader 2  
31  
32 ( $K_1=0.31$ ), Reader 2 vs. Reader 3 ( $K_2=0.46$ ) and Reader 3 vs. Reader 1 ( $K_3=0.42$ ). Thereafter, out  
33  
34 of these 88.54% (2829/3195) CXRs were found interpretable and remaining 11.45% (366/3195)  
35  
36 were found un-interpretable by radiologists. Among interpretable CXRs, we found 22.44%  
37  
38 (635/2829) children had primary end point pneumonia (PEP) alone or with infiltrates, other  
39  
40 infiltrates only 12.09% (342/2829) and 65.46% (1852/2829) had normal CXRs findings [Figure  
41  
42  
43  
44  
45  
46  
47  
48  
49  
50  
51  
52  
53  
54  
55  
56  
57  
58  
59  
60  
1].

Table 1 shows univariate distribution of socio-demographic and clinical variables among hospitalized cases across four participating districts. A statistically significant variation was observed in all socio-demographic variables such as place of residence, type of house, type of

family, maternal and paternal education and occupation, use of biomass fuel and parental smoking status across the four districts. We also found and report clinical variables of recruited cases across the four districts in **table 1**. While oxygen saturation by pulse-oxymetry was statistically significantly different across the sites, the proportion of cases with oxygen saturation  $\leq 92\%$  was found not significant in the children across four districts ( $p=0.13$ ).

**Table 1: Distribution of socio-demographic and clinical variables among hospitalized children for participating districts (Jan 2015-April 2017)**

| Characteristics                          | Lucknow           | Etawah           | Patna            | Darbhanga        | Total             | p value |
|------------------------------------------|-------------------|------------------|------------------|------------------|-------------------|---------|
| <b>Socio-demographic Characteristics</b> | <b>n=1025 (%)</b> | <b>n=389 (%)</b> | <b>n=744 (%)</b> | <b>n=671 (%)</b> | <b>N=2829 (%)</b> |         |
| <b>Gender</b>                            |                   |                  |                  |                  |                   |         |
| Male                                     | 659(64.29)        | 287(73.78)       | 557(74.87)       | 502(74.81)       | 2005(70.87)       | <0.0001 |
| <b>Place of residence</b>                |                   |                  |                  |                  |                   |         |
| Rural                                    | 195(19.02)        | 279(71.72)       | 304(40.86)       | 614(91.51)       | 1392(49.20)       | <0.0001 |
| Urban                                    | 830(80.98)        | 110(28.28)       | 440(59.14)       | 57(8.49)         | 1437(50.80)       |         |
| <b>Family Type</b>                       |                   |                  |                  |                  |                   |         |
| Joint                                    | 688(67.12)        | 360(92.54)       | 707(95.03)       | 383(57.08)       | 2138(75.57)       | <0.0001 |
| Nuclear                                  | 337(32.88)        | 29(7.46)         | 37(4.97)         | 287(42.77)       | 690(24.39)        |         |
| <b>House type</b>                        |                   |                  |                  |                  |                   |         |
| Mud                                      | 64(6.24)          | 54(13.88)        | 123(16.53)       | 374(55.74)       | 615(21.74)        |         |
| Bricks                                   | 854(83.32)        | 256(65.81)       | 453(60.89)       | 85(12.67)        | 1648(58.25)       | <0.0001 |
| Combined                                 | 107(10.4)         | 79(20.31)        | 168(22.58)       | 212(31.59)       | 566(20.01)        |         |
| <b>Mother's Education</b>                |                   |                  |                  |                  |                   |         |
| No formal education                      | 203(19.80)        | 56(14.40)        | 328(44.09)       | 496(73.92)       | 1083(38.28)       |         |
| Class I-V                                | 108(10.54)        | 28(7.20)         | 82(11.02)        | 38(5.66)         | 256(9.05)         | <0.0001 |
| Class VI-XII                             | 379(36.98)        | 176(45.24)       | 243(33.66)       | 112(16.69)       | 910(32.17)        |         |
| Graduate/ Post graduation                | 335(32.68)        | 129(33.16)       | 91(12.23)        | 25(3.73)         | 580(20.50)        |         |
| <b>Father's Education</b>                |                   |                  |                  |                  |                   |         |
| No formal education                      | 167(16.29)        | 29(7.46)         | 153(20.56)       | 345(51.42)       | 694(24.53)        |         |
| Class I-V                                | 85(8.29)          | 19(4.88)         | 91(12.23)        | 82(12.22)        | 277(9.79)         |         |
| Class VI-XII                             | 437(42.63)        | 206(52.96)       | 328(44.09)       | 205(30.55)       | 1176(41.57)       | <0.0001 |
| Graduate/ Post graduation                | 336(32.78)        | 135(34.70)       | 172(23.12)       | 39(5.81)         | 682(24.11)        |         |
| <b>Birth Order</b>                       |                   |                  |                  |                  |                   |         |
| 0                                        | 435(42.44)        | 187(48.07)       | 315(42.34)       | 192(28.61)       | 1129(39.91)       |         |
| 1 <sup>st</sup>                          | 343(33.46)        | 120(30.85)       | 235(31.59)       | 258(38.45)       | 956(33.79)        | <0.0001 |
| 2 <sup>nd</sup>                          | 153(14.93)        | 47(12.08)        | 129(17.34)       | 137(20.42)       | 466(16.47)        |         |
| More than 2 <sup>nd</sup>                | 93(9.07)          | 35(9.00)         | 62(8.33)         | 83(12.37)        | 273(9.65)         |         |
| <b>Immunization Status</b>               |                   |                  |                  |                  |                   |         |
| Complete for age                         | 792(77.27)        | 300(77.12)       | 711(95.56)       | 544(81.07)       | 2347(82.96)       |         |
| Incomplete for age                       | 220(21.46)        | 84(21.59)        | 25(3.36)         | 126(18.78)       | 455(16.08)        | <0.0001 |



|                                                                |                      |                     |                     |                     |                      |                |
|----------------------------------------------------------------|----------------------|---------------------|---------------------|---------------------|----------------------|----------------|
| Unimmunized                                                    | 13(1.27)             | 5(1.29)             | 8(1.08)             | 1(0.15)             | 27(0.95)             |                |
| <b>Currently Breast Feeding</b>                                |                      |                     |                     |                     |                      |                |
| Yes                                                            | 653(63.71)           | 256(65.81)          | 589(79.17)          | 537(80.03)          | 2035(71.93)          | <0.0001        |
| No                                                             | 372(36.29)           | 133(34.19)          | 155(20.83)          | 134(19.97)          | 794(28.07)           |                |
| <b>Father's Occupation</b>                                     |                      |                     |                     |                     |                      |                |
| Unemployed                                                     | 13(1.27)             | 20(5.14)            | 27(3.63)            | 63(9.39)            | 123(4.35)            |                |
| Daily wages                                                    | 329(32.10)           | 81(20.82)           | 165(22.18)          | 474(70.64)          | 1049(37.08)          |                |
| Salaried/ Professional                                         | 397(38.73)           | 104(26.74)          | 245(32.93)          | 55(8.20)            | 801(28.31)           | <0.0001        |
| Self-Employment                                                | 286(27.90)           | 184(47.30)          | 307(41.26)          | 79(11.77)           | 856(30.26)           |                |
| <b>Mother's Occupation</b>                                     |                      |                     |                     |                     |                      |                |
| Home maker                                                     | 961(93.76)           | 376(96.66)          | 701(94.22)          | 484(72.13)          | 2522(89.15)          |                |
| Daily wages                                                    | 17(1.66)             | 3(0.77)             | 17(2.28)            | 171(25.48)          | 208(7.35)            |                |
| Salaried/Professionals                                         | 47(4.59)             | 9(2.31)             | 18(2.42)            | 7(1.04)             | 81(2.86)             | <0.0001        |
| Self-Employment                                                | 0(0.0)               | 1(0.26)             | 8(1.08)             | 9(1.34)             | 18(0.64)             |                |
| <b>Biomass fuel</b>                                            |                      |                     |                     |                     |                      |                |
| Yes                                                            | 211(20.59)           | 245(62.98)          | 263(35.35)          | 609(90.76)          | 1328(46.94)          | <0.0001        |
| No                                                             | 814(79.41)           | 144(37.02)          | 481(64.65)          | 62(9.24)            | 1501(53.06)          |                |
| <b>Smoking Status-Father</b>                                   |                      |                     |                     |                     |                      |                |
| Yes                                                            | 152(14.83)           | 45(11.57)           | 56(7.53)            | 59(8.79)            | 312(11.03)           | <0.0001        |
| No                                                             | 873(85.17)           | 344(88.43)          | 688(92.47)          | 612(91.21)          | 2517(88.97)          |                |
| <b>Indoor smoking-Father</b>                                   |                      |                     |                     |                     |                      |                |
| Yes                                                            | 83(8.10)             | 21(5.40)            | 16(2.15)            | 43(6.41)            | 163(5.76)            | <0.0001        |
| No                                                             | 942(91.90)           | 368(91.60)          | 728(97.85)          | 628(93.59)          | 2666(94.24)          |                |
| <b>Smoking Status-Family member</b>                            |                      |                     |                     |                     |                      |                |
| Yes                                                            | 129(12.59)           | 55(14.14)           | 45(6.05)            | 102(15.20)          | 331(11.70)           | <0.0001        |
| No                                                             | 896(87.41)           | 334(85.86)          | 699(93.95)          | 569(84.80)          | 2498(83.30)          |                |
| <b>Indoor smoking – Family member</b>                          |                      |                     |                     |                     |                      |                |
| Yes                                                            | 84(8.20)             | 27(6.94)            | 27(3.63)            | 94(14.01)           | 232(8.20)            | <0.0001        |
| No                                                             | 941(91.80)           | 362(93.06)          | 717(96.37)          | 577(85.99)          | 2597(91.80)          |                |
| <b>Clinical Variables at the time of admission at hospital</b> | <b>n, Mean± SD</b>   | <b>n, Mean± SD</b>  | <b>n, Mean± SD</b>  | <b>n, Mean± SD</b>  | <b>n, Mean± SD</b>   | <b>p value</b> |
| Age (months)                                                   | 1025,<br>14.53±13.88 | 389,<br>10.69±10.95 | 744,<br>10.26±11.35 | 671,<br>12.30±13.29 | 2829,<br>12.35±12.85 | <0.0001        |
| Height (cm)                                                    | 303,<br>68.61±13.78  | 324,<br>70.66±13.75 | 34,<br>64.38±10.25  | 266,<br>70.46±12.14 | 927,<br>69.70±13.26  | <0.018         |
| Weight (Kg)                                                    | 900,<br>7.89±3.02    | 387,<br>7.35±2.74   | 682,<br>7.07±2.79   | 643,<br>7.70±2.88   | 2612,<br>7.55±2.90   | <0.0001        |
| Fever Duration (days )                                         | 929,<br>4.46±2.71    | 321,<br>3.59±2.37   | 689,<br>4.25±2.52   | 569,<br>3.54±2.47   | 2508,<br>4.08±2.59   | <0.0001        |
| Oxygen saturation (%)                                          | 528,<br>93.68±5.56   | 343,<br>92.56±6.20  | 236,<br>92.23±5.28  | 319,<br>94.19±4.63  | 1426,<br>93.28±5.53  | <0.0001        |
| ≤92 Oxygen Saturation Value                                    | 179,<br>88.26±6.37   | 132,<br>87.12±6.94  | 122,<br>88.57±4.69  | 70,<br>87.1±4.17    | 503,<br>87.87±5.98   | 0.13           |

**Table 2** shows proportions of radiological pneumonia among cases hospitalized for CAP in four participating districts. We found higher proportion of radiological abnormalities in Patna district [38.58 (95% CI: 35.07-42.07)] and Lucknow district [37.95 (95%CI: 34.98-40.92)] which have a large and urban population. Lower proportion of radiological abnormalities were noted in Etawah district [29.31 (95%CI: 24.78-33.82)] and Darbhanga district [27.87 (95% CI: 24.47-31.26)] which in contrast had larger rural population. We also observed correspondingly higher proportion of PEP alone or with other infiltrates in districts of Lucknow [72.49 (95% CI: 68.05-76.93)]; and Patna [64.11 (95% CI: 58.56-69.66)] and lower in districts of Etawah [64.04 (95% CI: 55.22 -72.84)]; and Darbhanga [51.34 (95% CI: 44.17-58.50)].

**Table 2** also describes univariate distribution of socio-demographic and clinical factors of CAP among hospitalized children aged 2-59 months. We observed statistically significant district-wise heterogeneity in radiological abnormalities. Statistically significantly higher proportion of females hospitalized for CAP had radiologically abnormal CXR. Likewise, statistically significantly higher proportion of abnormal vs. normal CXRs findings were reported in hospitalized cases who had symptoms of fever, pallor rhonchi and vomiting or were malnourished.

**Table 2: Distribution of socio-demographic and clinical factors by chest radiograph findings among hospitalized children from January 2015-April 2017**

| Socio-demographic & clinical factors | Interpretable chest X rays |                         |                          |         | Abnormal chest X rays                                     |                                      |         |
|--------------------------------------|----------------------------|-------------------------|--------------------------|---------|-----------------------------------------------------------|--------------------------------------|---------|
|                                      | N=2829                     | Normal<br>1852<br>n (%) | Abnormal<br>977<br>n (%) | p value | PEP* alone or<br>with other<br>infiltrate<br>635<br>n (%) | Other<br>infiltrates<br>342<br>n (%) | p value |
| <b>Participating site</b>            |                            |                         |                          |         |                                                           |                                      |         |
| Lucknow                              | 1025                       | 636<br>(62.05)          | 389<br>(37.95)           |         | 282<br>(72.49)                                            | 107<br>(27.51)                       |         |

|                                     |      |                 |                |         |                |                |         |
|-------------------------------------|------|-----------------|----------------|---------|----------------|----------------|---------|
| Etawah                              | 389  | 275<br>(70.69)  | 114<br>(29.31) | <0.0001 | 73<br>(64.04)  | 41<br>(35.96)  | <0.0001 |
| Patna                               | 744  | 457<br>(61.42)  | 287<br>(38.58) |         | 184<br>(64.11) | 103<br>(35.89) |         |
| Darbhanga                           | 671  | 484<br>(72.13)  | 187<br>(27.87) |         | 96<br>(51.34)  | 91<br>(48.66)  |         |
| <b>Age-group (months)</b>           |      |                 |                |         |                |                |         |
| 2-11                                | 1865 | 1223<br>(65.58) | 642<br>(34.42) | 0.86    | 409<br>(63.71) | 233<br>(36.29) | 0.26    |
| 12-59                               | 964  | 629<br>(65.25)  | 335<br>(34.75) |         | 226<br>(67.46) | 109<br>(32.54) |         |
| <b>Gender</b>                       |      |                 |                |         |                |                |         |
| Male                                | 2005 | 1354<br>(67.53) | 651<br>(32.46) | <0.0001 | 426<br>(65.44) | 225<br>(34.56) | 0.72    |
| Female                              | 824  | 498<br>(60.43)  | 326<br>(39.56) |         | 209<br>(64.44) | 117<br>(35.89) |         |
| <b>Place of residence</b>           |      |                 |                |         |                |                |         |
| Rural                               | 1392 | 921<br>(66.16)  | 471<br>(33.83) | 0.44    | 299<br>(63.48) | 172<br>(36.52) | 0.34    |
| Urban                               | 1437 | 931<br>(64.78)  | 506<br>(35.21) |         | 336<br>(66.40) | 170<br>(33.60) |         |
| <b>Biomass fuel</b>                 |      |                 |                |         |                |                |         |
| Yes                                 | 1501 | 867<br>(65.29)  | 461<br>(34.71) | 0.44    | 294(63.77)     | 167<br>(36.23) | 0.24    |
| No                                  | 1328 | 985<br>(65.62)  | 516<br>(34.38) |         | 341<br>(66.09) | 175<br>(33.91) |         |
| <b>Immunization status</b>          |      |                 |                |         |                |                |         |
| Complete for age                    | 2347 | 1546<br>(68.87) | 801<br>(34.12) | 0.32    | 516<br>(64.42) | 285<br>(35.58) | 0.54    |
| Incomplete                          | 482  | 306<br>(63.48)  | 176<br>(36.51) |         | 119<br>(67.61) | 57<br>(32.39)  |         |
| <b>Symptoms of pneumonia</b>        |      |                 |                |         |                |                |         |
| Fever                               | 2499 | 1616<br>(64.66) | 883<br>(35.33) | 0.014   | 575<br>(65.12) | 308<br>(34.88) | 0.82    |
| Cyanosis                            | 62   | 39<br>(62.90)   | 23<br>(37.09)  | 0.34    | 16<br>(69.57)  | 7<br>(30.43)   | 0.64    |
| Pallor                              | 764  | 465<br>(60.86)  | 299<br>(39.13) | 0.002   | 200<br>(66.89) | 99<br>(33.11)  | 0.41    |
| Rhonchi                             | 2054 | 1377<br>(67.03) | 677<br>(32.96) | 0.005   | 415<br>(61.30) | 262<br>(38.70) | 0.0003  |
| <b>Duration of illness fever in</b> | 2508 | 3.91±2.51       | 4.40±2.70      | <0.0001 | 4.57±2.82      | 4.08±2.44      | 0.011   |

|                                  |      |                 |                |          |                |                |      |
|----------------------------------|------|-----------------|----------------|----------|----------------|----------------|------|
| <b>days<br/>(Mean ± SD)</b>      |      |                 |                |          |                |                |      |
| <b>Danger Signs of pneumonia</b> |      |                 |                |          |                |                |      |
| Vomiting                         | 899  | 605<br>(67.30)  | 294<br>(32.70) | 0.17     | 174<br>(59.18) | 120<br>(40.82) | 0.01 |
| Lethargy                         | 1101 | 732<br>(66.49)  | 369<br>(33.51) | 0.39     | 247<br>(66.94) | 122<br>(33.06) | 0.33 |
| Difficulty in breathing          | 2705 | 1766<br>(65.29) | 939<br>(34.71) | 0.39     | 609<br>(64.86) | 330<br>(35.14) | 0.73 |
| Inability to drink               | 937  | 612<br>(65.31)  | 325<br>(34.69) | 0.46     | 211<br>(64.92) | 114<br>(35.08) | 0.97 |
| Convulsion                       | 148  | 98<br>(66.22)   | 50<br>(33.78)  | 0.93     | 33<br>(66.0)   | 17<br>(34.0)   | 0.87 |
| Blue Lips                        | 42   | 27<br>(64.29)   | 15<br>(35.71)  | 0.87     | 12<br>(80.0)   | 3<br>(20.0)    | 0.28 |
| <b>Malnutrition Status</b>       |      |                 |                |          |                |                |      |
| Normal *                         | 1912 | 1312<br>(68.62) | 600<br>(31.38) | < 0.0001 | 374<br>(62.33) | 226<br>(37.67) | 0.06 |
| Malnutrition*                    | 485  | 314<br>(64.74)  | 171<br>(35.26) |          | 115<br>(67.25) | 56<br>(32.75)  |      |
| Severe malnutrition*             | 432  | 226<br>(52.31)  | 206<br>(47.69) |          | 146<br>(70.87) | 60<br>(29.13)  |      |

\*Normal-weight of age z score > -2SD; Malnutrition-weight of age z ≤ -2SD and Severe malnutrition-weight of age z ≤ -3SD

**Table 3** describes four multivariate logistic regression models to find associates of abnormal CXR findings. After controlling for age, gender, symptoms of pneumonia, duration of illness, biomass fuel and malnutrition status of cases, statistically significant district-wise heterogeneity remained in the first three models. Models I, II and III had similar associates for radiological abnormalities whereas Model IV was different. Across all the four models, female cases of CAP and those who had severe malnutrition had statistically significantly higher risk for having abnormal CXRs. A higher risk of radiological abnormalities was also observed in those children who had longer duration of illness.

**Table 3: Independent Associations between Chest Radiograph Findings and demographic and clinical factors, among hospitalized children January 2015-April 2017**

| Variables                                  | Model – I<br>Abnormal/Normal <sup>Ref</sup> |         | Model – II<br>PEP alone or with<br>other infiltrate<br>/Normal <sup>Ref</sup> |         | Model – III<br>PEP alone Vs. Normal <sup>Ref</sup> |         | Model – IV<br>Other infiltrate /<br>Normal <sup>Ref</sup> |            |
|--------------------------------------------|---------------------------------------------|---------|-------------------------------------------------------------------------------|---------|----------------------------------------------------|---------|-----------------------------------------------------------|------------|
|                                            | Adjusted<br>Odd Ratio<br>(95%CI)            | p value | Adjusted<br>Odd Ratio<br>(95%CI)                                              | p value | Adjusted<br>Odd Ratio<br>(95%CI)                   | p value | Adjusted<br>Odd Ratio<br>(95%CI)                          | P<br>value |
| <b>Districts</b>                           |                                             |         |                                                                               |         |                                                    |         |                                                           |            |
| Lucknow Vs. Others                         | 1.58<br>(1.20-2.10)                         | <0.0001 | 2.07<br>(1.48-2.89)                                                           | <0.0001 | 2.20<br>(1.52-3.19)                                | <0.0001 | 0.98<br>(0.65-1.47)                                       | 0.93       |
| Etawah Vs. Others                          | 1.22<br>(0.88-1.70)                         | 0.23    | 1.30<br>(0.87-1.95)                                                           | 0.19    | 1.49<br>(0.95-2.30)                                | 0.07    | 1.17<br>(0.74-1.87)                                       | 0.50       |
| Patna Vs. Others                           | 1.67<br>(1.27-2.20)                         | <0.0001 | 1.89<br>(1.36-2.64)                                                           | <0.0001 | 2.25<br>(1.56-3.24)                                | <0.0001 | 1.39<br>(0.95-2.07)                                       | 0.09       |
| <b>Age – Group ( months)</b>               |                                             |         |                                                                               |         |                                                    |         |                                                           |            |
| 2-11 <sup>Ref</sup>                        |                                             |         |                                                                               |         |                                                    |         |                                                           |            |
| 12-59                                      | 0.92<br>(0.77-1.10)                         | 0.34    | 0.95<br>(0.77-1.17)                                                           | 0.62    | 1.03<br>(0.82-1.29)                                | 0.79    | 0.86<br>(0.66-1.13)                                       | 0.27       |
| <b>Gender</b>                              |                                             |         |                                                                               |         |                                                    |         |                                                           |            |
| Male <sup>Ref</sup>                        |                                             |         |                                                                               |         |                                                    |         |                                                           |            |
| Female                                     | 1.39<br>(1.16-1.66)                         | <0.0001 | 1.34<br>(1.08-1.65)                                                           | 0.008   | 1.28<br>(1.01-1.61)                                | 0.03    | 1.48<br>(1.14-1.92)                                       | 0.004      |
| <b>Symptoms of pneumonia<sup>¶</sup></b>   |                                             |         |                                                                               |         |                                                    |         |                                                           |            |
| Rhonchi                                    | 0.83<br>(0.68-1.01)                         | 0.06    | 0.72<br>(0.57-0.90)                                                           | 0.005   | 0.75<br>(0.59-0.96)                                | 0.02    | 1.14<br>(0.83-1.55)                                       | 0.42       |
| Pallor                                     | 1.30<br>(1.08-1.58)                         | 0.006   | 1.28<br>(1.03-1.60)                                                           | 0.02    | 1.22<br>(0.95-1.55)                                | 0.12    | 1.34<br>(1.01-1.77)                                       | 0.04       |
| Vomiting                                   | 0.90<br>(0.75-1.09)                         | 0.28    | 0.80<br>(0.64-0.99)                                                           | 0.04    | 0.78<br>(0.62-1.01)                                | 0.05    | 1.09<br>(0.83-1.08)                                       | 0.51       |
| <b>Duration of illness, fever ( days )</b> | 1.06<br>(1.04-1.09)                         | <0.0001 | 1.08<br>(1.04-1.12)                                                           | <0.0001 | 1.08<br>(1.04-1.12)                                | <0.0001 | 1.03<br>(0.98-1.48)                                       | 0.24       |
| <b>Biomass fuel</b>                        | 1.28<br>(1.05-1.57)                         | 0.02    | 1.39<br>(1.10-1.76)                                                           | 0.006   | 1.40<br>(1.14-1.88)                                | 0.003   | 1.08<br>(0.79-1.45)                                       | 0.64       |
| <b>Malnutrition Status</b>                 |                                             |         |                                                                               |         |                                                    |         |                                                           |            |
| Normal <sup>*Ref</sup>                     |                                             |         |                                                                               |         |                                                    |         |                                                           |            |
| Malnutrition*                              | 1.16<br>(0.93-1.45)                         | 0.20    | 1.19<br>(0.92-1.55)                                                           | 0.19    | 1.19<br>(0.90-1.59)                                | 0.22    | 1.06<br>(0.76-1.48)                                       | 0.69       |
| Severe malnutrition*                       | 1.64<br>(1.30-2.06)                         | <0.0001 | 1.80<br>(1.39-2.34)                                                           | <0.0001 | 1.86<br>(1.40-2.46)                                | <0.0001 | 1.33<br>(0.94-1.89)                                       | <0.10      |

**Abbreviations used:** <sup>Ref</sup> Reference Category

**Footnotes:** <sup>¶</sup> No signs of pneumonia taken as a reference

\*Normal-weight of age z score > -2SD; Malnutrition-weight of age z ≤ -2SD and Severe malnutrition-weight of age z ≤ -3SD

## DISCUSSION

This prospective hospital-based surveillance study was conducted to assess the radiological abnormalities in children (2-59 months) residing in pre-specified districts of Uttar Pradesh and Bihar, India and hospitalized with CAP. The study was conducted from January 2015 to April 2017, prior to introduction of PCV in NIP of Government of India <sup>9</sup>. In our study, among interpretable CXRs, we found 22.44% (635/2829) children had PEP alone or with infiltrates, other infiltrates only 12.09% (342/2829) and 65.46% (1852/2829) had normal CXRs findings. Our study used WHO case definition for CAP <sup>18</sup>. A panel of three trained radiologists interpreted CXRs, adopting WHO recommended methodology <sup>11 12</sup>. These make our study methodology robust and results generalizable.

In our study, there were 88.54% (2829/3195) interpretable CXRs. This is similar to 83% (3587/3973) interpretable CXRs reported by Pneumonia Etiology Research for Child Health (PERCH) study conducted on 4232 children (1-59 months) to assess the etiology of CAP in nine sites of seven countries <sup>24</sup>. Consistent with PERCH findings, a vaccine probe trial conducted in Gambia found the proportion of interpretable CXRs among unvaccinated cases of pneumonia to be 84.32% (242/287) <sup>25</sup>.

There have been several studies in the past two decades, which have reported CXRs findings in hospitalized cases of CAP. Almost all of these were conducted before the introduction of PCV in their respective regions. A small prospective study conducted in Ethiopia reported radiological abnormality in CXRs to be 48.3% (95% CI 39.49-57.22) in 122 children (3 months-14 years) clinically diagnosed with WHO-defined severe pneumonia <sup>26</sup>. Similar findings were reported

1  
2  
3 from the Gambian vaccine probe trial where the proportion of radiological abnormality was 45%  
4 (95% CI: 43.35-46.46) among unvaccinated hospitalized cases of clinical pneumonia. PERCH  
5  
6 (95% CI: 52.31-55.57) of CXRs among cases of CAP were abnormal <sup>24</sup>.  
7  
8 In all of these studies, proportion of cases with abnormal CXRs is higher than 34.5% (95% CI  
9  
10 32.8-36.3) found by us in the current study. However, our findings are similar to PERCH rural  
11  
12 study site of Matlab, Bangladesh that reported radiological abnormality in 35.3% (95% CI:  
13  
14 29.77-40.85) CXRs of hospitalized cases of CAP <sup>24</sup>. Another PERCH urban site of Dhaka,  
15  
16 Bangladesh reported 63.10% (95% CI 56.18 -70.02) cases with abnormal CXRs <sup>24</sup>. In our study,  
17  
18 radiological abnormalities in CXRs were higher in cases from largely urban districts of Patna and  
19  
20 Lucknow compared to rural districts of Darbhanga and Etawah. This is consistent with rural-  
21  
22 urban differences in Bangladesh sites of PERCH. Variation in CXR findings among cases of  
23  
24 CAP may be due to infecting organism, immune response of patient and prior duration of  
25  
26 disease.  
27  
28  
29  
30  
31  
32  
33  
34

35 In 2016, WHO's Department of Immunization, Vaccines and Biologicals standardized the  
36  
37 categorization of radiological pneumonia and established that PEP can be taken as a good  
38  
39 surrogate marker of SP in epidemiological and vaccine efficacy studies <sup>12</sup>. In our study, 22.44 %  
40  
41 (95% C.I. 20.90 -23.98), CXRs were having PEP alone or with other infiltrates. This is similar to  
42  
43 PERCH study that reported PEP alone or with other infiltrates in 27% (95% C.I. 25.50 -28.40)  
44  
45 hospitalized cases of CAP <sup>24</sup>. Another study conducted in Gambia reported that 45% (95% CI:  
46  
47 43.35-46.46) non-vaccinated children had PEP and/or other infiltrates <sup>25</sup>. PEP has been  
48  
49 associated with increased risk of treatment failure (p=0.002), increased length of hospitalization  
50  
51  
52  
53  
54  
55  
56  
57  
58  
59  
60

1  
2  
3 (p=0.0003) and more days of respiratory support (p=0.002) in Botswana when compared with  
4 cases reporting `no significant pathology` on CXRs <sup>27</sup> .  
5  
6  
7  
8  
9

10 In our study, female gender (p<0.001) was at the higher risk of developing radiological  
11 abnormalities compared to males (**table 3**). The results are in concordance with a hospital-based  
12 case-control study carried out in Brazil that reported male gender as a protective factor against  
13 pneumonia (OR = 0.53; 95 % CI 0.39–0.72) <sup>28</sup>. Another study in Mozambique, Africa reported  
14 that male gender was not significantly associated with presence of radiological abnormalities  
15 (OR =0.77 (95 % CI 0.56–1.05) in children (0-59 months) suffering from severe pneumonia <sup>29</sup>.  
16  
17 However, in contrast, a Gambian study reported male preponderance for all pneumonia that was  
18 most marked for `other infiltrates/abnormalities` pneumonia <sup>25</sup>.  
19  
20  
21  
22  
23  
24  
25  
26  
27  
28  
29  
30

31 A systematic review with meta-analysis conducted in 2019 suggests that no one clinical feature  
32 is sufficient on its own to diagnose of radiological pneumonia <sup>30</sup>. However other socio-  
33 demographic and clinical correlates of abnormal CXRs found by us (Model 1), which increased  
34 the risk of radiological abnormalities, were presence of pallor, severe malnutrition, longer  
35 duration of illness and exposure to biomass fuel. Exposure to biomass fuel at the time of cooking  
36 is an important factor that impacts the severity of CAP in developing countries <sup>31</sup>. In rural India,  
37 majority of the households use biomass fuel like firewood, dung cakes and wood for cooking <sup>32</sup>.  
38  
39 Young children are at risk to adverse effects of exposure to biomass fuel as either the households  
40 have no separate cooking space or have poor ventilation and sometimes young children stay with  
41 their mother while she cooks.  
42  
43  
44  
45  
46  
47  
48  
49  
50  
51  
52  
53  
54  
55  
56  
57  
58  
59  
60



1  
2  
3 Specific correlates of PEP/Radiological Pneumonia (Models II and III) possibly due to SP, other  
4 than those mentioned above, were presence of vomiting and ronchi on auscultation, both of  
5 which were found to be protective. These symptoms/signs are more often reported in viral  
6 pneumonia<sup>33</sup>. No specific correlates of radiological abnormalities of `other infiltrates` (Model  
7 IV) were found by us. Hence it is difficult to attribute radiological findings of other infiltrates to  
8 either bacterial or viral etiology.  
9  
10  
11  
12  
13  
14  
15  
16  
17  
18

19 Based on our study, almost two-third hospitalized cases of CAP had normal CXRs and this could  
20 be perhaps of viral etiology. This is supported by a recent study that reported 61.4% (95% CI  
21 57.3–65.6) cases to be viral<sup>33</sup>. Among one-third of cases of CAP had abnormal CXRs and thus  
22 were more likely to be bacterial in etiology, and two-thirds of which were possibly due to SP.  
23  
24  
25  
26  
27  
28  
29  
30

## 31 CONCLUSION

32  
33  
34 Among hospitalized cases of community-acquired pneumonia, almost one-third children had  
35 abnormal chest radiographs of which about two-thirds had abnormalities related with possible  
36 bacterial etiology (SP). Hence, the introduction of pneumococcal vaccination is likely to reduce  
37 the burden of childhood pneumonia in India. Since the study was done prior to the introduction  
38 of PCV in India, continued surveillance will be required to assess the impact of PCV on  
39 radiological findings in cases admitted with CAP. The impact of introduction of PCV in NIP on  
40 under-five mortality rate and burden of CAP needs to be assessed.  
41  
42  
43  
44  
45  
46  
47  
48  
49  
50  
51  
52

53 **Acknowledgements:** We thank the state governments of Uttar Pradesh and Bihar for giving  
54 us permission to conduct the study. We extend our gratitude to participating tertiary and  
55  
56  
57  
58  
59  
60

1  
2  
3 secondary care hospitals for their contribution. Members of the Lucknow Community-Acquired  
4 Pneumonia (CAP) Group: King George's Medical University (KGMU), Lucknow, India: Prof.  
5  
6 Shally Awasthi, Department of Pediatrics, Prof. Neera Kohli, Department of Radio-diagnosis,  
7  
8 Prof. Monica Agarwal, Department of Community Medicine; Mr. Puneet Dhasmana, Project  
9  
10 Staff; Patna Medical College and Hospital, Patna, Bihar-Prof. Neelam Verma and Prof. Chandra  
11  
12 Bhushan Kumar, Department of Pediatrics; Darbhanga Medical College and Hospital,  
13  
14 Darbhanga, Bihar, India- Prof. Chittaranjan Roy, Department of Community Medicine, Prof.  
15  
16 Kripanath Mishra, Department of Pediatrics; Uttar Pradesh University of Medical Sciences,  
17  
18 Etawah, Uttar Pradesh, India- Prof. Pankaj Kumar Jain, Department of Community Medicine,  
19  
20 Prof. Rajesh Yadav, Department of Pediatrics.  
21  
22  
23  
24  
25

26 **Contributors:** The study was conceived and designed by SA. CAP study group performed data  
27  
28 acquisition. CMP and NM<sup>3</sup> conducted the statistical analysis of the data. The paper was written  
29  
30 by SA, TV, MA and CMP. AC, NM<sup>5</sup>, RCS and NK interpreted chest x-rays. All authors were  
31  
32 involved with drafting and revising the work and approved the final submission.  
33  
34

35 **Funding statement:** The study was supported by Bill & Melinda Gates Foundation  
36  
37 (<https://www.gatesfoundation.org/>) via Grant No: OPP1118005. Funding agency had no role in  
38  
39 the design of the study and collection, analysis and interpretation of data, or in writing the  
40  
41 manuscript.  
42  
43

44 **Competing interests:** None declared.  
45

46 **Patient consent for publication:** Not required.  
47

48  
49 **Ethics approval:** The Institutional Ethics Committee of King George's Medical University  
50  
51 (Lucknow), The Uttar Pradesh University of Medical Sciences (Etawah), Patna Medical College  
52  
53  
54  
55  
56  
57

1  
2  
3 and Hospital (Patna) and Darbhanga Medical College and Hospital (Darbhanga) gave ethical  
4 approval for the conduct of study.  
5  
6

7  
8 **Provenance and peer review:** Not commissioned; externally peer reviewed.  
9

10 **Data sharing statement:** The data contained within this study can be obtained by writing to  
11 [shally07@gmail.com](mailto:shally07@gmail.com)  
12  
13

14 **Copyright information:** This is an Open Access article distributed in accordance with the  
15 Creative Commons Attribution Non Commercial (CC BY-NC 4.0) license, which permits others  
16 to distribute, remix, adapt, build upon this work non-commercially, and license their derivative  
17 works on different terms, provided the original work is properly cited and the use is non-  
18 commercial. See: <http://creativecommons.org/licenses/by-nc/4.0/>  
19  
20  
21  
22  
23  
24  
25  
26  
27

## 28 **Supporting Information**

29 S1 Appendix: Chest radiograph interpretation form  
30  
31  
32  
33  
34  
35  
36

## 37 **REFERENCES:**

- 38 1. UNICEF U. Levels and trends in child mortality. Estimates developed by the UN inter-  
39 agency group for child mortality estimation. 2011.
- 40 2. Amouzou A, Velez LC, Tarekegn H, *et al.* One is too many: ending child deaths from  
41 pneumonia and diarrhoea.  
42
- 43 3. Mathew JL, Patwari AK, Gupta P, *et al.* Acute respiratory infection and pneumonia in India:  
44 a systematic review of literature for advocacy and action: UNICEF-PHFI series on newborn  
45 and child health, India. *Indian Pediatr* 2011; 48: 191–218.  
46
- 47 4. Farooqui H, Jit M, Heymann DL, *et al.* Burden of severe pneumonia, pneumococcal  
48 pneumonia and pneumonia deaths in Indian states: modelling based estimates. *PLoS One*  
49 2015  
50  
51  
52  
53  
54  
55  
56  
57

- 1  
2  
3 5. Rudan I, O'Brien KL, Nair H, *et al.* Epidemiology and etiology of childhood pneumonia in  
4 2010: estimates of incidence, severe morbidity, mortality, underlying risk factors and  
5 causative pathogens for 192 countries. *Journal of global health*. 2013 Jun;3(1).  
6  
7
- 8 6. Leung DT, Chisti MJ, Pavia AT. Prevention and control of childhood pneumonia and  
9 diarrhea. *Pediatric Clinics*. 2016 Feb 1;63 (1):67-79.  
10  
11
- 12 7. Virkki R, Juven T, Rikalainen H, *et al.* Differentiation of bacterial and viral pneumonia in  
13 children. *Thorax*. 2002 May 1;57(5):438-41.  
14
- 15 8. World Health Organization. Pneumococcal conjugate vaccines in infants and children under  
16 5 years of age: WHO position paper—February 2019. Accessed 12th July 2019.  
17
- 18 9. Government of India. Introduction of Pneumococcal Conjugate Vaccine: Operational  
19 Guidelines. Ministry of Health and Family Welfare, 2017 Available at:  
20 [https://nhm.gov.in/New\\_Updates\\_2018/NHM\\_Components/Immunization/Guidelines\\_for\\_i](https://nhm.gov.in/New_Updates_2018/NHM_Components/Immunization/Guidelines_for_i)  
21 [mmunization/Operational\\_Guidelines\\_for\\_PCV\\_introduction.pdf](https://nhm.gov.in/New_Updates_2018/NHM_Components/Immunization/Guidelines_for_i) Assessed 12th July 2019.  
22  
23  
24
- 25 10. Cherian T, Mulholland EK, Carlin JB, *et al.* Standardized interpretation of paediatric chest  
26 radiographs for the diagnosis of pneumonia in epidemiological studies. *Bulletin of the World*  
27 *Health Organization*. 2005;83:353-9  
28  
29  
30
- 31 11. Pneumonia Vaccine Trial Investigators' Group. Standardization of Interpretation of Chest  
32 Radiographs for the Diagnosis of Pneumonia in Children. Geneva: Department of Vaccines  
33 and Biologicals, World Health Organization; 2001  
34  
35
- 36 12. Mahomed N, Fancourt N, De Campo J, *et al.* Preliminary report from the World Health  
37 Organization chest radiography in epidemiological studies project. *Pediatric radiology*. 2017  
38 Oct 1;47 (11):1399-404.  
39  
40
- 41 13. Greenberg D, Givon-Lavi N, Ben-Shimol S, *et al.* Impact of PCV7/PCV13 introduction on  
42 community-acquired alveolar pneumonia in children < 5 years. *Vaccine*. 2015 Aug 26;  
43 33(36):4623-9. 6.  
44  
45
- 46 14. Sutcliffe CG, Shet A, Varghese R, *et al.* Nasopharyngeal carriage of Streptococcus  
47 pneumoniae serotypes among children in India prior to the introduction of pneumococcal  
48 conjugate vaccines: a cross-sectional study. *BMC Infect Dis*. 2019 Dec;19(1):605.  
49  
50
- 51 15. Annual health survey (AHS) factsheet 2012–13 Uttar Pradesh [Internet]. New Delhi: Office  
52 of Registrar General & Census Commissioner, Ministry of Home Affairs, Government of  
53 India; 2010–2011. Available  
54  
55  
56  
57

- 1  
2  
3 from:[http://www.censusindia.gov.in/vital\\_statistics/AHSBulletins/AHS\\_Factsheets\\_2012-](http://www.censusindia.gov.in/vital_statistics/AHSBulletins/AHS_Factsheets_2012-13/FACTSHEET-UTTAR_PRADESH.pdf)  
4 [13/FACTSHEET-UTTAR\\_PRADESH.pdf](http://www.censusindia.gov.in/vital_statistics/AHSBulletins/AHS_Factsheets_2012-13/FACTSHEET-UTTAR_PRADESH.pdf) [cited 2019 Aug 8].  
5  
6  
7 16. Annual health survey (AHS) factsheet 2012–13 Bihar [Internet]. New Delhi: Office of  
8 Registrar General & Census Commissioner, Ministry of Home Affairs, Government of India;  
9 2010–2011. Available  
10 from:[http://www.censusindia.gov.in/vital\\_statistics/AHSBulletins/AHS\\_Factsheets\\_2012-](http://www.censusindia.gov.in/vital_statistics/AHSBulletins/AHS_Factsheets_2012-13/FACTSHEET-Bihar.pdf)  
11 [13/FACTSHEET-Bihar.pdf](http://www.censusindia.gov.in/vital_statistics/AHSBulletins/AHS_Factsheets_2012-13/FACTSHEET-Bihar.pdf) [cited 2019 Aug 8].  
12  
13  
14  
15 17. Awasthi S, Pandey CM, Verma T, *et al.* Incidence of community-acquired pneumonia in  
16 children aged 2-59 months of age in Uttar Pradesh and Bihar, India, in 2016: An indirect  
17 estimation. *PloS one*. 2019 Mar 20;14(3):e0214086.  
18  
19  
20 18. World Health Organization. Revised WHO classification and treatment of childhood  
21 pneumonia at health facilities. Geneva: World Health Organization. 2014:6-14.  
22  
23  
24 19. Awasthi S, Singh JV, Kohli N, *et al.* Hospital-based surveillance for radiological pneumonia  
25 in children under 5 years of age in Uttar Pradesh and Bihar. *Pediatric Infectious Disease*.  
26 2016 Jun 30;8(2):52-7.  
27  
28  
29 20. Bassignani MJ, Bubash-Faust L, Ciambotti J, *et al.* Conversion of teaching file cases from  
30 film to digital format: a comparison between use of a diagnostic-quality digitizer and use of a  
31 flatbed scanner with transparency adapter. *Acad Radiol*. 2003 May 1;10(5):536-42.  
32  
33  
34 21. Dean AG, Arner AT, Sunki GG, *et al.* Epi Info™, a database and statistics program for  
35 public health professionals. Atlanta, GA, USA: CDC; 2011.  
36  
37  
38 22. De Onis M, Blossner M, World Health Organization. WHO global database on child growth  
39 and malnutrition. Geneva: World Health Organization; 1997.  
40  
41  
42 23. SPSS Inc. Released 2009. SPSS for Windows [software], Version 22.0. Chicago, SPSS Inc.  
43 Available from:[www.spss.com](http://www.spss.com)  
44  
45 24. Fancourt N, Deloria Knoll M, Baggett HC, *et al.* Chest radiograph findings in childhood  
46 pneumonia cases from the multisite PERCH study. *Clin Infect Dis*. 2017 May  
47 29;64(suppl\_3):S262-70  
48  
49  
50 25. Enwere G, Cheung YB, Zaman SM, *et al.* Epidemiology and clinical features of pneumonia  
51 according to radiographic findings in Gambian children. *Trop Med Int Health*. 2007  
52 Nov;12(11):1377-85.  
53  
54  
55  
56  
57  
58  
59  
60

- 1  
2  
3 26. Meiron Hassen, Alemayehu Toma, Mulugeta Tesfay, *et al.* Radiologic Diagnosis and  
4 Hospitalization among Children with Severe Community Acquired Pneumonia: A  
5 Prospective Cohort Study. *Biomed Res Int*, vol. 2019, Article ID 6202405, 8 pages, 2019.  
6  
7 <https://doi.org/10.1155/2019/6202405>.  
8  
9
- 10 27. Kelly MS, Crotty EJ, Rattan MS, *et al.* Chest radiographic findings and outcomes of  
11 pneumonia among children in Botswana. *Pediatr Infect Dis J.* 2016 Mar;35(3):257.  
12
- 13 28. da Fonseca Lima EJ, Mello MJ, Lopes MI, *et al.* Risk factors for community-acquired  
14 pneumonia in children under five years of age in the post-pneumococcal conjugate vaccine  
15 era in Brazil: a case control study. *BMC Pediatr.* 2016 Dec;16(1):157.  
16  
17
- 18 29. Sigauque B, Roca A, Bassat Q, *et al.* Severe pneumonia in Mozambican young children:  
19 clinical and radiological characteristics and risk factors. *J Trop Pediatr.* 2009 Apr  
20 28;55(6):379-87.  
21  
22
- 23 30. Rambaud-Althaus C, Althaus F, Genton B, *et al.* Clinical features for diagnosis of  
24 pneumonia in children younger than 5 years: a systematic review and meta-analysis. *Lancet*  
25 *Infect Dis.* 2015 Apr 1;15(4):439-50  
26  
27
- 28 31. Awasthi S, Glick AH, Fletcher RH. Effect of cooking fuels on Respiratory Diseases in Pre-  
29 school children in Lucknow, India. *Am J Trop Med Hyg* 1996; 55: 48-51  
30
- 31 32. Tielsch JM, Katz J, Thulasiraj RD, *et al.* Exposure to indoor biomass fuel and tobacco smoke  
32 and risk of adverse reproductive outcomes, mortality, respiratory morbidity and growth  
33 among newborn infants in south India. *Int J Epidemiol.* 2009 Sep 16;38 (5):1351-63.  
34  
35
- 36 33. O'Brien KL, Baggett HC, Brooks WA, *et al.* Causes of severe pneumonia requiring hospital  
37 admission in children without HIV infection from Africa and Asia: the PERCH multi-country  
38 case-control study. *The Lancet.* 2019 Jun 27  
39  
40  
41  
42  
43  
44  
45

## 46 **Figure Legend**

47  
48 Figure 1: Flow diagram of cases of community acquired pneumonia recruited from participating  
49 districts before the introduction of pneumococcal conjugate vaccine (January 2015-April 2017)  
50  
51  
52  
53  
54  
55  
56  
57  
58  
59  
60

Figure 1: Flow diagram of cases of community acquired pneumonia recruited from participating districts before introduction of pneumococcal conjugate vaccine (January 2015-April 2017)

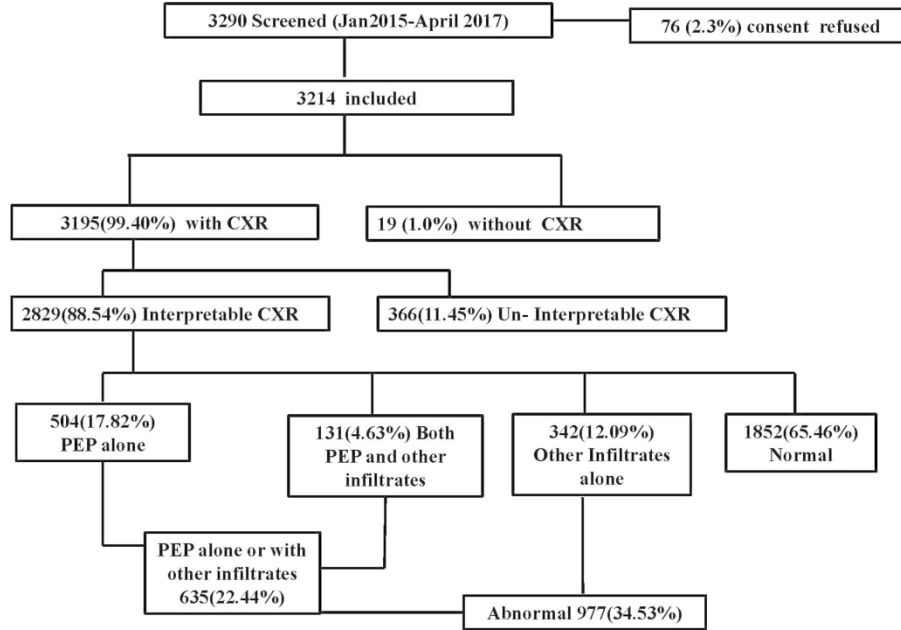

Figure 1: Flow diagram of cases of community acquired pneumonia recruited from participating districts before the introduction of pneumococcal conjugate vaccine (January 2015-April 2017)

254x190mm (300 x 300 DPI)

**Childhood Pneumonia Surveillance**  
Department of Paediatrics, KGMU, Lucknow ,UP

**Form-R**  
(RADIOLOGY REPORT FORM)

|    |                                        |                                                                                                                                                                                                                                                                                      |
|----|----------------------------------------|--------------------------------------------------------------------------------------------------------------------------------------------------------------------------------------------------------------------------------------------------------------------------------------|
| 1  | <b>Drs_ID</b>                          | [ ][ ][ ][ ]                                                                                                                                                                                                                                                                         |
|    | <b>Radiology Report</b>                | <b>Patient Details</b>                                                                                                                                                                                                                                                               |
| 2  | <b>IDNo:</b>                           | [ ] / [ ] / [ ][ ][ ][ ][ ][ ][ ]<br>State /District / Unit / Subject number<br>(For office use)                                                                                                                                                                                     |
| 2  | <b>Date Of Report</b>                  | [ ][ ]/[ ][ ]/[ ][ ][ ][ ] (DD/MM/YYYY)                                                                                                                                                                                                                                              |
|    | <b>Report Details</b>                  | <b>Findings ( tick one)</b>                                                                                                                                                                                                                                                          |
| 3  | <b>Image Quality</b>                   | Adequate <input type="checkbox"/> Suboptimal <input type="checkbox"/> Un-interpretable <input type="checkbox"/>                                                                                                                                                                      |
| 4  | <b>Significant Pathology</b>           | Yes <input type="checkbox"/> No <input type="checkbox"/> Un-interpretable <input type="checkbox"/>                                                                                                                                                                                   |
| 5  | <b>End Point Consolidation</b>         |                                                                                                                                                                                                                                                                                      |
| 5a | Left                                   | Yes <input type="checkbox"/> No <input type="checkbox"/> Un-interpretable <input type="checkbox"/>                                                                                                                                                                                   |
| 5b | Right                                  | Yes <input type="checkbox"/> No <input type="checkbox"/> Un-interpretable <input type="checkbox"/>                                                                                                                                                                                   |
|    |                                        | Uninterpretable                                                                                                                                                                                                                                                                      |
| 6  | <b>Other Infiltrates/Abnormalities</b> |                                                                                                                                                                                                                                                                                      |
| 6a | Left                                   | Yes <input type="checkbox"/> No <input type="checkbox"/> Un-interpretable <input type="checkbox"/>                                                                                                                                                                                   |
| 6b | Right                                  | Yes <input type="checkbox"/> No <input type="checkbox"/> Un-interpretable <input type="checkbox"/>                                                                                                                                                                                   |
| 7  | <b>Pleural Fluid</b>                   |                                                                                                                                                                                                                                                                                      |
| 7a | Left                                   | Yes <input type="checkbox"/> No <input type="checkbox"/> Un-interpretable <input type="checkbox"/>                                                                                                                                                                                   |
| 7b | Right                                  | Yes <input type="checkbox"/> No <input type="checkbox"/> Un-interpretable <input type="checkbox"/>                                                                                                                                                                                   |
| 8  | <b>Comments:</b>                       | <input style="width: 100%; height: 15px;" type="text"/>                                                                                                                                                                                                                              |
| 9  | <b>Conclusion:</b>                     | a) Primary endpoint pneumonia only <input type="checkbox"/><br>b) Other infiltrate only <input type="checkbox"/><br>c) Both PEP and other infiltrate <input type="checkbox"/><br>d) Normal <input type="checkbox"/><br>e) Un-interpretable for any findings <input type="checkbox"/> |



# BMJ Open

## Chest Radiograph Findings in children aged 2-59 months hospitalized with Community-Acquired Pneumonia, prior to the introduction of Pneumococcal Conjugate Vaccine in India- A Prospective Multisite Observational Study

|                                 |                                                                                                                                                                                                                                                                                                                                                                                                                                                                                                                                                                                                                                                                                                                                                                                                                                           |
|---------------------------------|-------------------------------------------------------------------------------------------------------------------------------------------------------------------------------------------------------------------------------------------------------------------------------------------------------------------------------------------------------------------------------------------------------------------------------------------------------------------------------------------------------------------------------------------------------------------------------------------------------------------------------------------------------------------------------------------------------------------------------------------------------------------------------------------------------------------------------------------|
| Journal:                        | <i>BMJ Open</i>                                                                                                                                                                                                                                                                                                                                                                                                                                                                                                                                                                                                                                                                                                                                                                                                                           |
| Manuscript ID                   | bmjopen-2019-034066.R1                                                                                                                                                                                                                                                                                                                                                                                                                                                                                                                                                                                                                                                                                                                                                                                                                    |
| Article Type:                   | Original research                                                                                                                                                                                                                                                                                                                                                                                                                                                                                                                                                                                                                                                                                                                                                                                                                         |
| Date Submitted by the Author:   | 02-Jan-2020                                                                                                                                                                                                                                                                                                                                                                                                                                                                                                                                                                                                                                                                                                                                                                                                                               |
| Complete List of Authors:       | Awasthi, Shally; King George's Medical University, Pediatrics<br>Rastogi, Tuhina; King George's Medical University, Paediatrics<br>Mishra, Neha; King George's Medical University, Pediatrics<br>Chauhan, Abhishek ; Dr Ram Manohar Lohia Institute of Medical Sciences, Department of Radio-diagnosis<br>Mohindra, Namita; Sanjay Gandhi Post Graduate Institute of Medical Sciences, Department of Radio-diagnosis<br>Shukla, Ram ; Banaras Hindu University, Varanasi, India, Institute of Medical Sciences<br>Agarwal, Monica; King George's Medical University, Department of Community Medicine<br>Pandey, CM; Sanjay Gandhi Post Graduate Institute of Medical Sciences, Biostatistics & Health Informatics<br>Kohli, Neera ; King George's Medical University, Department of Radio-diagnosis<br>Study Group, CAP; CAP study Group |
| <b>Primary Subject Heading</b>: | Paediatrics                                                                                                                                                                                                                                                                                                                                                                                                                                                                                                                                                                                                                                                                                                                                                                                                                               |
| Secondary Subject Heading:      | Global health                                                                                                                                                                                                                                                                                                                                                                                                                                                                                                                                                                                                                                                                                                                                                                                                                             |
| Keywords:                       | Chest radiographs, Hospitalized community-acquired pneumonia, under-five, Streptococcus pneumoniae, India                                                                                                                                                                                                                                                                                                                                                                                                                                                                                                                                                                                                                                                                                                                                 |
|                                 |                                                                                                                                                                                                                                                                                                                                                                                                                                                                                                                                                                                                                                                                                                                                                                                                                                           |

SCHOLARONE™  
Manuscripts



I, the Submitting Author has the right to grant and does grant on behalf of all authors of the Work (as defined in the below author licence), an exclusive licence and/or a non-exclusive licence for contributions from authors who are: i) UK Crown employees; ii) where BMJ has agreed a CC-BY licence shall apply, and/or iii) in accordance with the terms applicable for US Federal Government officers or employees acting as part of their official duties; on a worldwide, perpetual, irrevocable, royalty-free basis to BMJ Publishing Group Ltd ("BMJ") its licensees and where the relevant Journal is co-owned by BMJ to the co-owners of the Journal, to publish the Work in this journal and any other BMJ products and to exploit all rights, as set out in our [licence](#).

The Submitting Author accepts and understands that any supply made under these terms is made by BMJ to the Submitting Author unless you are acting as an employee on behalf of your employer or a postgraduate student of an affiliated institution which is paying any applicable article publishing charge ("APC") for Open Access articles. Where the Submitting Author wishes to make the Work available on an Open Access basis (and intends to pay the relevant APC), the terms of reuse of such Open Access shall be governed by a Creative Commons licence – details of these licences and which [Creative Commons](#) licence will apply to this Work are set out in our licence referred to above.

Other than as permitted in any relevant BMJ Author's Self Archiving Policies, I confirm this Work has not been accepted for publication elsewhere, is not being considered for publication elsewhere and does not duplicate material already published. I confirm all authors consent to publication of this Work and authorise the granting of this licence.

1  
2  
3  
4 Title: *Chest Radiograph Findings in children aged 2-59*  
5 *months hospitalized with Community-Acquired Pneumonia,*  
6 *prior to the introduction of Pneumococcal Conjugate Vaccine*  
7 *in India- A Prospective Multisite Observational Study*  
8  
9  
10  
11

12  
13 Short Title: *Radiological Findings in Children hospitalized*  
14 *with Community-Acquired Pneumonia in India Pre-*  
15 *Pneumococcal Conjugate Vaccine introduction*  
16  
17  
18  
19  
20

21 **Shally Awasthi<sup>1\*</sup>, Tuhina Rastogi<sup>1</sup>, Neha Mishra<sup>1</sup>, Abhishek**  
22 **Chauhan<sup>2</sup>, Namita Mohindra<sup>3</sup>, Ram Chandra Shukla<sup>4</sup>, Monica**  
23 **Agarwal<sup>5</sup>, Chandra Mani Pandey<sup>6</sup>, Neera Kohli<sup>7</sup> and CAP Group<sup>^</sup>**  
24  
25  
26  
27

28 <sup>1</sup>Department of Pediatrics, King George's Medical University, Lucknow, India

29 <sup>2</sup>Department of Radio-diagnosis, Dr Ram Manohar Lohia Institute of Medical Sciences,  
30 Lucknow, India

31 <sup>3</sup>Department of Radio-diagnosis, Sanjay Gandhi Post Graduate Institute of Medical Sciences,  
32 Lucknow, India

33 <sup>4</sup>Department of Radio-diagnosis, Institute of Medical Sciences, Banaras Hindu University,  
34 Varanasi, India

35 <sup>5</sup> Department of Community Medicine, King George's Medical University, Lucknow, India

36 <sup>6</sup>Department of Biostatistics and Health Informatics, Sanjay Gandhi Postgraduate  
37 Institute of Medical Sciences, Lucknow, India

38 <sup>7</sup>Department of Radio-diagnosis, King George's Medical University, Lucknow, India  
39  
40  
41  
42

43  
44 <sup>^</sup>Members of the Lucknow CAP Group are given in the Acknowledgement  
45  
46

47 \*Corresponding Author

48 Postal Address: Prof. Shally Awasthi, Head, Department of Paediatrics, King George's Medical  
49 University, Lucknow , India Pincode: 226003

50 Mobile: +91-9839221244

51 E-mail: shally07@gmail.com  
52  
53

54 Word Count: 4533    Tables: 3    Figure:1  
55  
56  
57  
58  
59  
60

## ABSTRACT

**Objectives:** To assess radiological abnormalities in chest X-rays and to identify the demographic and clinical correlates of specific radiological abnormalities in children aged 2-59 months, hospitalized with World Health Organization defined community-acquired pneumonia, residing in pre-specified districts of Uttar Pradesh and Bihar, India.

**Design:** Prospective, hospital-based surveillance

**Setting:** Multi-site study conducted in a network of 117 secondary/tertiary care hospitals in four districts of Uttar Pradesh and Bihar, India.

**Participants:** Included were children aged 2-59 months hospitalized with community-acquired pneumonia, residing in project district, with duration of illness of <14 days and who were not hospitalized elsewhere for this episode nor had been recruited previously.

**Main outcome measure:** Radiological abnormalities in the chest X-rays, where there was concordance between two or more of the panel of three trained radiologists.

**Results:** From January 2015 to April 2017, 3214 cases were recruited and in 99.40 % (3195/3214) chest X-rays were available. Among 88.54 % (2829/3195) interpretable X-rays, 34.53 % (977/ 2829, 95% C.I. 32.78 -36.28) had some radiological abnormalities, while the rest were normal. Primary endpoint pneumonia alone or with other infiltrates was found in 22.44 % (635/2829, C.I. 20.90 %-23.98 %), other infiltrates only in 12.09% (342/ 2829; C.I. 10.88 %-13.29 %). There was a statistically significant inter-district variation in radiological abnormality. Statistically significantly higher proportion of abnormal chest X-ray was found among girls, those with weight-for-age z score  $\leq -3$  SD, longer duration of fever, pallor and with exposure to biomass fuel.

1  
2  
3 **Conclusions:** Among hospitalized cases of community-acquired pneumonia, almost one-third  
4 children had abnormal chest radiographs of which about two-thirds had abnormalities related  
5 with possible bacterial etiology (*Streptococcus pneumoniae*). Hence introduction of  
6 pneumococcal vaccination is likely to reduce burden of childhood pneumonia in India.  
7  
8  
9  
10  
11  
12  
13

14 **Key words:** Chest radiographs, Hospitalized community-acquired pneumonia, under-five,  
15 *Streptococcus pneumoniae*, India  
16  
17  
18  
19

## 20 **Strengths and Limitations of the Study**

21  
22

- 23 • Prospective, multisite recruitments from a large hospital surveillance network established for  
24 the project in four districts in two states of India that have high under-five mortality rates  
25
- 26 • Standard World Health Organization definition was used for identifying hospitalized cases of  
27 clinical pneumonia  
28
- 29 • Radiological abnormalities interpreted by a panel of three trained radiologists at locations out  
30 of the surveillance network, blinded to each other as well as clinical features of the case  
31
- 32 • Since pre-existing X-rays machines were used in this pragmatic study, there was a variation  
33 in the quality of images obtained, which were minimized by digitizing them centrally  
34
- 35 • Since the objective of the study was to assess the radiological abnormalities in chest X-rays of  
36 recruited cases, clinical data was recorded by pre-existing hospital staff, there could be some  
37 inter-observer variations.  
38  
39  
40  
41  
42  
43  
44  
45  
46  
47  
48  
49  
50

# 1 INTRODUCTION

2 Community-acquired pneumonia (CAP) is the single largest infectious cause of death in young  
3 children worldwide. Globally, pneumonia accounts for 16% of deaths in children under-five years of  
4 age and results in almost one million deaths (0.9 million children in 2016) every year<sup>1-2</sup>. Most  
5 deaths due to pneumonia occur in low and middle income countries particularly in sub-Saharan  
6 Africa and South Asia<sup>2,3</sup>. In India, there were approximately 0.44 million under-five deaths due to  
7 CAP in the year 2015<sup>4</sup>.

8  
9 CAP could have viral or bacterial etiology<sup>5-7</sup>. Etiology varies from country to country and also  
10 across different time periods. Pediatric bacterial pneumonia is predominantly caused by  
11 *Streptococcus pneumoniae* (SP) and *Hemophilus influenzae Type B* (HiB) while Respiratory  
12 syncytial virus and Influenza A or B virus are important contributors of pediatric viral  
13 pneumonia<sup>5-6</sup>. The World Health Organization (WHO) recommends the introduction of  
14 Pneumococcal Conjugate Vaccine (PCV) in the national immunization programme of countries  
15 with high child mortality rates, which includes India<sup>8</sup>. Consequently, PCV-13 was launched in  
16 May 2017 under the national immunization programme of five Indian states (Uttar Pradesh,  
17 Bihar, Rajasthan, Madhya Pradesh and Himachal Pradesh) in a phased manner<sup>9</sup>. It is expected to  
18 be rolled out in other parts of the country in the near future. Vaccination against HiB is already  
19 under the national immunization programme since 2011.

20  
21 Differentiating bacterial from viral etiology of CAP on clinical features or by investigations  
22 remains difficult<sup>7-10-11</sup>. Several PCV probe trials have used radiographically confirmed alveolar

23 pneumonia, also called end-point pneumonia, to be an outcome for vaccine efficacy and this has  
24 been endorsed by WHO <sup>12-14</sup>.

26 The current study was a hospital-based surveillance to assess the radiological abnormalities in  
27 chest X-rays (CXRs) and to identify the demographic and clinical correlates of specific  
28 radiological abnormalities in children aged 2-59 months, hospitalized with WHO defined CAP,  
29 residing in pre-specified districts of Uttar Pradesh and Bihar, India.

## 31 **METHODS**

### 32 **Study design and Setting**

33 This prospective multi-site observational study was conducted in Lucknow and Etawah districts  
34 of Uttar Pradesh and Patna & Darbhanga districts of Bihar, India. Uttar Pradesh is the first most  
35 populated and Bihar third most populated state of India<sup>15 16</sup>. In Lucknow district 66.2% population  
36 resides in urban areas and in Patna district 43.07% <sup>15 16</sup>. In contrast, only 22.3% population of  
37 Etawah district and 9.74% population of Darbhanga district resides in urban areas <sup>15 16</sup>. All four  
38 project districts have alarmingly high infant and child mortality indicators <sup>15-17</sup>. The under-five  
39 mortality rates of Lucknow (58/1000), Etawah (85/1000), Patna (46/1000) and Darbhanga  
40 (77/1000) districts are above the national average (50/1000) <sup>15-17</sup>. Similarly, the infant mortality  
41 rates of Lucknow (44/1000), Etawah (56/1000), Patna (31/1000) and Darbhanga (44/1000)  
42 districts are also higher than the national average (41/1000) <sup>15-17</sup>.

### 44 **Study Population**

1  
2  
3 45 A hospital-based surveillance system was established for this study<sup>17 18</sup>. Included in the  
4  
5 46 surveillance were public and private hospitals of study districts which provided either secondary  
6  
7 47 or tertiary level care to admitted children. All children (2-59 months), hospitalized in network  
8  
9 48 hospitals between January 2015 to April 2017, with history of fast breathing with/without chest  
10  
11 49 in-drawing were screened<sup>18</sup>.  
12  
13  
14  
15

16 50  
17 51 Included were children hospitalized with symptoms of WHO defined CAP and residing in the  
18  
19 52 project district<sup>18</sup>. WHO has developed guidelines for hospital-based management of common  
20  
21 53 childhood illness such as pneumonia<sup>19</sup>. According to these guidelines, fast breathing  $\geq 50$   
22  
23 54 breaths/minute in a child aged 2–11 months and  $\geq 40$  breaths/minute in a child aged 12-59  
24  
25 55 months along with chest indrawing was categorized as having 'pneumonia'<sup>19</sup>. A child presenting  
26  
27 56 with cough or difficulty in breathing with: (a) oxygen saturation  $< 90\%$  or central cyanosis (b)  
28  
29 57 severe respiratory distress (e.g. grunting, very severe chest indrawing) and (c) signs of  
30  
31 58 pneumonia with a general danger sign (inability to breastfeed or drink, lethargy or reduced level  
32  
33 59 of consciousness, convulsions) was categorized as having 'severe pneumonia'<sup>19</sup>. Excluded were  
34  
35 60 children with cough for  $\geq 14$  days or those that had been hospitalized in last 14 days<sup>18</sup>.  
36  
37  
38  
39  
40  
41  
42

## 43 62 **Sample Size**

44  
45 63 We assumed that the incidence of radiological pneumonia is 3/100 child years of observations.  
46  
47 64 Then for a margin of error of 1.5/100 child years of observation, incidence of pneumonia in the  
48  
49 65 community of 20/100 child years of observation, alpha level of 0.05, and power of 90% when the  
50  
51 66 estimated population of children under-five years of age in Lucknow district<sup>20</sup> is 750,000; 693  
52  
53 67 cases had to be included per district.  
54  
55  
56  
57  
58  
59  
60



## 68 **Data collection**

69 Data was collected by surveillance officers who had postgraduate degree in social sciences and  
70 almost 10 years experience in community based health research. After recruitment, they were  
71 imparted six-day centralized training on project procedures and logistics. Class-room as well as  
72 practical skills-training was given by the coordinating centre in Lucknow. Pre and post tests were  
73 conducted to ascertain knowledge and skills acquired by them through the training to ensure  
74 quality in data collection. The coordinating centre provided annual refresher trainings to the  
75 surveillance officers from all four sites in Lucknow.

77 After obtaining written, informed consent of the caregivers, data was collected through face-to-  
78 face interviews with them as well as by abstraction from hospital records. Socio-demographic  
79 data, obtained by interviewing caregivers, was: child's age, gender, residence, birth order,  
80 immunization status, current breastfeeding status, parental education and occupation, smoking  
81 status of parents, family type, housing infrastructure, use of biomass fuel etc. Caregivers were  
82 also asked about the symptoms of disease and its duration in days.

84 Clinical data, recorded by pre-existing hospital staff at the time of hospitalization, was  
85 abstracted. Where available, data was collected on anthropometry (weight and height), fever  
86 (axillary temperature  $\geq 37.5^{\circ}\text{C}$ ), oxygen saturation by pulse oxymetry, pallor, central cyanosis,  
87 and danger signs of pneumonia and vital signs (heart rate and respiratory rate). Presence of  
88 wheezing on auscultation of chest was abstracted, when recorded. At the hospitals, clinicians  
89 generally used Integrated Management of Childhood Illness (IMCI) definitions<sup>21</sup> to identify  
90 pallor, cyanosis, wheeze on auscultation and general danger sign as it is incorporated in their

1  
2  
3 91 medical undergraduate training. Most doctors of public health sector also receive a formal in-  
4  
5 92 service training on IMCI <sup>21</sup>. Clinical outcome (survival or mortality) was noted from hospital  
6  
7 93 records on follow up.<sup>17 18</sup>.  
8  
9  
10 94

### 95 **Chest x-ray (CXR) image acquisition and archiving**

15 96 CXR (poster-anterior view) was done when advised by the treating physician. These CXRs were  
16  
17 97 obtained by the surveillance staff at the time of recruitment. CXRs were either analog or digital.  
18  
19 98 In case of digital CXRs, second copy was obtained where possible. If only single analog image  
20  
21 99 was available, then the hardcopy of CXR was obtained from the caregiver after the child was  
22  
23  
24 100 discharged. If this could not be done, image of the hardcopy was captured. CXR machines were  
25  
26 101 not provided through the project.  
27  
28  
29 102

31 103 CXRs of recruited cases were subsequently scanned and converted into digital format using a  
32  
33 104 diagnostic-quality film image digitalizer (Microteck International Limited, model Medi 6000  
34  
35 105 plus) <sup>22</sup>. CXRs obtained/converted into digital image were stored as per the standard operating  
36  
37 106 procedure and were subsequently archived for web-based radiological interpretation. Digital  
38  
39 107 images were stored in JPEG format at 300 dpi resolution. Each CXR file was anonymized and  
40  
41 108 given a unique identification number. Digital CXRs were uploaded on online data management  
42  
43 109 software, developed especially for the project.  
44  
45  
46  
47 110

### 50 111 **Interpretation of radiological images**

52 112 A panel of radiologists was constituted for standardized interpretations of CXRs. Four  
53  
54 113 radiologists were part of this panel, one of whom was Project co-investigator-Radiology (NK).  
55  
56  
57  
58  
59  
60

1  
2  
3 114 All radiologists are faculty in medical teaching institutes and also look after pediatric radiology.  
4  
5 115 They all have more than fifteen years experience in interpreting pediatric CXRs.  
6  
7  
8 116

9  
10 117 Radiologists were trained according to the methodology developed by Department of  
11  
12 118 Immunization, Vaccines, and Biologicals of the WHO <sup>11</sup>. An international WHO-certified  
13  
14 119 trainer from the International Centre for Diarrhoeal Disease Research, Bangladesh imparted a  
15  
16 120 two-day in-house training to the radiologists. Training objective was to standardize interpretation  
17  
18 121 and coding of CXRs, to develop a CXR reporting form [S1 Appendix] and to provide training  
19  
20 122 on web-based CXR retrieval and reporting system. During the training, 210 CXRs of WHO data  
21  
22 123 set were used. For assessing concordance post training, another set of 48 CXRs was provided for  
23  
24 124 interpretation to individual radiologists. Post-test agreement with WHO findings was calculated,  
25  
26 125 which was about 80%. Inter-observer variation was about 25% and was for minor interpretation  
27  
28 126 like quality of film, end point infiltrates etc. Repeat training was conducted on an additional set  
29  
30 127 of 44 CXRs provided by WHO to ensure standardization in interpretation. Thereafter,  
31  
32 128 concordance achieved by the radiologists was reviewed quarterly by the study arbitrator.  
33  
34 129 Radiologists met annually to review key concepts and discuss challenges faced in interpreting  
35  
36 130 CXRs.  
37  
38  
39  
40  
41  
42  
43

44 132 After training, radiologists independently reviewed CXRs and registered their findings in an  
45  
46 133 online standardized chest radiograph interpretation form [S1 Appendix]. For optimal viewing of  
47  
48 134 CXRs, all radiologists used similar workstations. Specifications were provided for the computer  
49  
50 135 monitor and hardware to be used. It was ensured that monitors had the correct brightness and  
51  
52 136 contrast adjustment for optimal viewing.  
53  
54  
55  
56  
57  
58  
59  
60

1  
2  
3 137  
4  
5 138 During online evaluation, radiologists recorded the quality of film, findings of CXRs and  
6  
7  
8 139 conclusion. Radiologists interpreted film quality as follows: (a) *'Adequate/optimal'* for features  
9  
10 140 that allow confident interpretation of consolidation and pleural effusion as well as other  
11  
12 141 infiltrates; (b) *'Suboptimal'* for features that allow interpretation of consolidation and pleural  
13  
14 142 effusion, but not of other infiltrates or findings and (c) *'Un-interpretable'* pertaining to features  
15  
16 143 of the image that are not interpretable with respect to presence or absence of consolidation or  
17  
18  
19 144 pleural effusion without additional images<sup>12</sup>.  
20  
21

22 145  
23  
24 146 After interpreting film quality, radiologists interpreted the pathological findings. For each  
25  
26 147 radiographic finding, there were two options to be chosen: 'yes' for the presence of pathological  
27  
28 148 findings and 'no' for its absence. Pathological findings were classified into significant pathology  
29  
30 149 (including pleural effusion) and the presence of consolidation and infiltrates. *'End-point*  
31  
32 150 *consolidation'* for CXRs was defined as dense or confluent opacity that occupies a portion or  
33  
34 151 whole of a lobe or the entire lung, that may or may not contain air bronchograms. Portion of the  
35  
36 152 lung would mean the opacity covering the width of intercostal spaces plus the width of one  
37  
38 153 adjacent rib. *'Other (non end-point) infiltrate'* for CXRs was defined as linear and patchy  
39  
40 154 opacities (interstitial infiltrate) in a lacy pattern, featuring peri-bronchial thickening and multiple  
41  
42 155 areas of atelectasis or minor patchy infiltrates that are not of sufficient magnitude to constitute  
43  
44 156 endpoint consolidation, and small areas of atelectasis that in children may be difficult to  
45  
46 157 distinguish from consolidation. *'Pleural effusion'* was defined as presence of fluid in the lateral  
47  
48  
49 158 pleural space between the lung and chest wall that is spatially associated with a pulmonary  
50  
51  
52 159 parenchymal infiltrate (including 'other infiltrate') or has obliterated enough of the hemithorax to  
53  
54  
55  
56  
57  
58  
59  
60

1  
2  
3 160 obscure any infiltrate. In most cases, this will be seen at the costo-phrenic angle or as a layer of  
4  
5 161 fluid adjacent to the lateral chest-wall. This does not include fluid seen in the horizontal or  
6  
7  
8 162 oblique fissures <sup>12</sup>.

9  
10 163  
11  
12 164 Final conclusions were categorised into: (a) '*Primary End Point Pneumonia only*' (PEP) on the  
13  
14 165 presence of consolidation or pleural effusion; (b) '*Other (non end-point) infiltrate only*' on the  
15  
16 166 presence of other (non-consolidation) infiltrates as defined above in the absence of a pleural  
17  
18 167 effusion (c) '*Both PEP and other infiltrate*' and (d) '*Normal*' when there were no findings  
19  
20 168 consistent with 'endpoint consolidation' or 'other infiltrate' or 'pleural effusion'<sup>12</sup>.

21  
22 169  
23  
24 170 After radiological interpretation, online data was archived, stored and checked for  
25  
26 171 inconsistencies and completeness by the data manager. CXRs with concordant and discordant  
27  
28 172 interpretations were identified. Interpretations were considered concordant when there was an  
29  
30 173 agreement between two or more radiologists and discordant if all the three radiologists disagreed.  
31  
32 174 Discordant interpretations were forwarded to the study arbitrator (NK). Arbitrator assessed  
33  
34 175 discordant CXRs online and her interpretation was taken as final.

35  
36 176

## 37 38 177 **Data management and statistical analysis**

39  
40 178 Clinical data of hospital surveillance network was entered online in customized software.  
41  
42 179 Primary entry was done by the four participating sites. Secondary data entry was done by the  
43  
44 180 coordinating site in separate customized software. Anonymized CXRs were uploaded on  
45  
46 181 customized software. Each of the three panelists assessed the CXRs online, blind to peer

1  
2  
3 182 assessments as well as clinical features of the case. CXR assessment data was downloaded from  
4  
5 183 the online software in MS Access database.  
6  
7  
8 184

9  
10 185 Exploratory data analysis was performed for detection of outlier and missing observations for all  
11  
12 186 the variables. Descriptive statistics was calculated for continuous variables as mean  $\pm$  standard  
13  
14 187 deviation and categorical variables in percent. Un-interpretable CXRs were not analyzed. Among  
15  
16 188 interpretable CXRs, those radiological abnormalities where there was concordance between the  
17  
18 189 two radiologists, were taken as final. Weight-for-age (WAZ) z-score each child was calculated  
19  
20 190 using WHO Anthro Survey Analyser <sup>23</sup>. Weight of 7.59% (215/2829) children was missing in  
21  
22 191 our data. Missing weight of recruited children was estimated using regression based imputation  
23  
24 192 technique <sup>24</sup>. Kappa statistics was performed for agreement analysis among radiologists for  
25  
26 193 CXRs findings. Statistical analysis was performed using SPSS version 22.0 (Chicago, IL) <sup>25</sup>. A  
27  
28 194 p-value of  $<0.05$  was taken as statistically significant using a two-tailed distribution.  
29  
30  
31  
32  
33

34 195  
35  
36 196 Univariate analysis was performed to evaluate heterogeneity, stratified by four participating sites  
37  
38 197 for socio-demographic variables such as child's age, gender, residence, birth order,  
39  
40 198 immunization status, current breastfeeding status, parental education and occupation, smoking  
41  
42 199 status of parents, family type, housing infrastructure, use of biomass fuel and for clinical  
43  
44 200 variables such as weight, height, duration of fever and oxygen saturation.  
45  
46  
47

48 201  
49  
50 202 We report proportions of radiological abnormalities among hospitalized children for CAP by  
51  
52 203 four districts. Univariate analysis was performed to assess association of socio-demographic  
53  
54 204 variables and clinical signs of CAP with radiological abnormalities. Chi-square test was used for  
55  
56  
57

1  
2  
3 205 categorical variables and student's t-test for continuous variables. ANOVA test was used for  
4  
5 206 more than two groups to test the significance of continuous variables. Multivariate unconditional  
6  
7 207 logistic regression was performed find association of presence of various radiological  
8  
9 208 abnormalities, controlling for district of residence and other variables that had univariate  
10  
11 209 association with radiological abnormalities (p value  $\leq 0.2$ ) and/or were clinically meaningful.  
12  
13  
14  
15 210

16  
17 211 We developed four models and in these four models dependent (outcome) were:

18  
19 212 Model I: Abnormal vs. Normal

20  
21 213 Model II: Primary End Point Pneumonia (PEP) alone or with infiltrates vs. Normal

22  
23 214 Model III: Primary End Point Pneumonia (PEP) alone vs. Normal

24  
25 215 Model IV: Other infiltrates only vs. Normal

26  
27 216  
28  
29  
30  
31 217 Independent variables that were kept across all the four models were : participating districts, age,  
32  
33 218 gender, use of biomass fuel, symptoms of CAP such as duration of illness, presence of wheeze  
34  
35 219 on ascultation, pallor, vomiting everything and malnutrition status of the case [ $WAZ \leq -2$  SD  
36  
37 220 (malnourished) and  $WAZ \leq -3$  SD (severely malnourished)].  
38  
39

40 221

## 41 42 222 **Patient and public involvement in research**

43  
44  
45 223 Patients or public were not involved in the development of research question, study design or  
46  
47 224 conducting the research. Reporting of this research conforms to the guidelines for Strengthening  
48  
49 225 the Reporting of Observational Studies in Epidemiology (STROBE)<sup>26</sup>.

50  
51  
52 226

## 53 54 55 227 **RESULTS**

228 A total of 3290 hospitalized cases were screened in hospital surveillance network of Lucknow  
 229 and Etawah districts of Uttar Pradesh and Patna & Darbhanga districts of Bihar. Out of these,  
 230 3214 cases fulfilling the WHO diagnosis of CAP were included [Figure 1]. Among them, 3195  
 231 (99.40%) cases were enrolled with CXRs and only in 19 (1.0%) cases CXRs were not done. Out  
 232 of these 88.54% (2829/3195) CXRs were found interpretable and remaining 11.45% (366/3195)  
 233 were found un-interpretable by radiologists. Among interpretable CXRs, we found 22.44%  
 234 (635/2829) children had primary end point pneumonia (PEP) alone or with infiltrates, 12.09%  
 235 (342/2829) other infiltrates only and 65.46% (1852/2829) had normal CXRs findings [Figure 1].  
 236 Concordance among  $\geq 2$  radiologists for CXRs findings was 86.0%. Kappa statistics was  
 237 calculated for agreement of CXRs findings between Reader 1 versus Reader 2 ( $K_1=0.31$ ), Reader  
 238 2 versus Reader 3 ( $K_2=0.46$ ) and Reader 3 versus Reader 1 ( $K_3=0.42$ ).

240 **Table 1** shows univariate distribution of socio-demographic and clinical variables among  
 241 hospitalized cases across four participating districts. A statistically significant variation was  
 242 observed in all socio-demographic variables such as place of residence, type of house, type of  
 243 family, maternal and paternal education and occupation, use of biomass fuel and parental  
 244 smoking status across the four districts. We also report clinical variables of recruited cases across  
 245 the four districts in **table 1**. Oxygen saturation by pulse-oxymetry was statistically significantly  
 246 different across the sites, the proportion of cases with oxygen saturation  $\leq 90$  % was found also  
 247 found statistically significant in children across four districts ( $p < 0.0001$ ).

248

249 **Table 1: Distribution of socio-demographic and clinical variables among hospitalized children for**  
 250 **participating districts (Jan 2015-April 2017)**

| Characteristics   | Lucknow | Etawah | Patna | Darbhangha | Total  | p value |
|-------------------|---------|--------|-------|------------|--------|---------|
| Socio-demographic | n=1025  | n=389  | n=744 | n=671      | N=2829 |         |



| Characteristics                 | (%)        | (%)        | (%)        | (%)        | (%)         | (%)     |
|---------------------------------|------------|------------|------------|------------|-------------|---------|
| <b>Gender</b>                   |            |            |            |            |             |         |
| Male                            | 659(64.29) | 287(73.78) | 557(74.87) | 502(74.81) | 2005(70.87) | <0.0001 |
| <b>Place of residence</b>       |            |            |            |            |             |         |
| Rural                           | 195(19.02) | 279(71.72) | 304(40.86) | 614(91.51) | 1392(49.20) | <0.0001 |
| Urban                           | 830(80.98) | 110(28.28) | 440(59.14) | 57(8.49)   | 1437(50.80) |         |
| <b>Family Type</b>              |            |            |            |            |             |         |
| Joint                           | 688(67.12) | 360(92.54) | 707(95.03) | 383(57.08) | 2138(75.57) | <0.0001 |
| Nuclear                         | 337(32.88) | 29(7.46)   | 37(4.97)   | 287(42.77) | 690(24.39)  |         |
| <b>House type</b>               |            |            |            |            |             |         |
| Mud                             | 64(6.24)   | 54(13.88)  | 123(16.53) | 374(55.74) | 615(21.74)  |         |
| Bricks                          | 854(83.32) | 256(65.81) | 453(60.89) | 85(12.67)  | 1648(58.25) | <0.0001 |
| Combined                        | 107(10.4)  | 79(20.31)  | 168(22.58) | 212(31.59) | 566(20.01)  |         |
| <b>Mother's Education</b>       |            |            |            |            |             |         |
| No formal education             | 203(19.80) | 56(14.40)  | 328(44.09) | 496(73.92) | 1083(38.28) |         |
| Class I-V                       | 108(10.54) | 28(7.20)   | 82(11.02)  | 38(5.66)   | 256(9.05)   | <0.0001 |
| Class VI-XII                    | 379(36.98) | 176(45.24) | 243(33.66) | 112(16.69) | 910(32.17)  |         |
| Graduate/ Post graduation       | 335(32.68) | 129(33.16) | 91(12.23)  | 25(3.73)   | 580(20.50)  |         |
| <b>Father's Education</b>       |            |            |            |            |             |         |
| No formal education             | 167(16.29) | 29(7.46)   | 153(20.56) | 345(51.42) | 694(24.53)  |         |
| Class I-V                       | 85(8.29)   | 19(4.88)   | 91(12.23)  | 82(12.22)  | 277(9.79)   |         |
| Class VI-XII                    | 437(42.63) | 206(52.96) | 328(44.09) | 205(30.55) | 1176(41.57) | <0.0001 |
| Graduate/ Post graduation       | 336(32.78) | 135(34.70) | 172(23.12) | 39(5.81)   | 682(24.11)  |         |
| <b>Birth Order</b>              |            |            |            |            |             |         |
| 1 <sup>st</sup>                 | 435(42.44) | 187(48.07) | 315(42.34) | 192(28.61) | 1129(39.91) |         |
| 2 <sup>nd</sup>                 | 343(33.46) | 120(30.85) | 235(31.59) | 258(38.45) | 956(33.79)  | <0.0001 |
| 3 <sup>rd</sup>                 | 153(14.93) | 47(12.08)  | 129(17.34) | 137(20.42) | 466(16.47)  |         |
| More than 3 <sup>rd</sup>       | 93(9.07)   | 35(9.00)   | 62(8.33)   | 83(12.37)  | 273(9.65)   |         |
| <b>Immunization Status</b>      |            |            |            |            |             |         |
| Complete for age                | 792(77.27) | 300(77.12) | 711(95.56) | 544(81.07) | 2347(82.96) |         |
| Incomplete for age              | 220(21.46) | 84(21.59)  | 25(3.36)   | 126(18.78) | 455(16.08)  | <0.0001 |
| Unimmunized                     | 13(1.27)   | 5(1.29)    | 8(1.08)    | 1(0.15)    | 27(0.95)    |         |
| <b>Currently Breast Feeding</b> |            |            |            |            |             |         |
| Yes                             | 653(63.71) | 256(65.81) | 589(79.17) | 537(80.03) | 2035(71.93) | <0.0001 |
| No                              | 372(36.29) | 133(34.19) | 155(20.83) | 134(19.97) | 794(28.07)  |         |
| <b>Father's Occupation</b>      |            |            |            |            |             |         |
| Unemployed                      | 13(1.27)   | 20(5.14)   | 27(3.63)   | 63(9.39)   | 123(4.35)   |         |
| Daily wages                     | 329(32.10) | 81(20.82)  | 165(22.18) | 474(70.64) | 1049(37.08) |         |
| Salaried/ Professional          | 397(38.73) | 104(26.74) | 245(32.93) | 55(8.20)   | 801(28.31)  | <0.0001 |
| Self-Employment                 | 286(27.90) | 184(47.30) | 307(41.26) | 79(11.77)  | 856(30.26)  |         |
| <b>Mother's Occupation</b>      |            |            |            |            |             |         |
| Home maker                      | 961(93.76) | 376(96.66) | 701(94.22) | 484(72.13) | 2522(89.15) |         |
| Daily wages                     | 17(1.66)   | 3(0.77)    | 17(2.28)   | 171(25.48) | 208(7.35)   |         |
| Salaried/Professionals          | 47(4.59)   | 9(2.31)    | 18(2.42)   | 7(1.04)    | 81(2.86)    | <0.0001 |
| Self-Employment                 | 0(0.0)     | 1(0.26)    | 8(1.08)    | 9(1.34)    | 18(0.64)    |         |
| <b>Biomass fuel</b>             |            |            |            |            |             |         |
| Yes                             | 211(20.59) | 245(62.98) | 263(35.35) | 609(90.76) | 1328(46.94) | <0.0001 |
| No                              | 814(79.41) | 144(37.02) | 481(64.65) | 62(9.24)   | 1501(53.06) |         |
| <b>Smoking Status-Father</b>    |            |            |            |            |             |         |

|                                                                |                      |                     |                     |                     |                      |                |
|----------------------------------------------------------------|----------------------|---------------------|---------------------|---------------------|----------------------|----------------|
| Yes                                                            | 152(14.83)           | 45(11.57)           | 56(7.53)            | 59(8.79)            | 312(11.03)           | <0.0001        |
| No                                                             | 873(85.17)           | 344(88.43)          | 688(92.47)          | 612(91.21)          | 2517(88.97)          |                |
| <b>Indoor smoking-Father</b>                                   |                      |                     |                     |                     |                      |                |
| Yes                                                            | 83(8.10)             | 21(5.40)            | 16(2.15)            | 43(6.41)            | 163(5.76)            | <0.0001        |
| No                                                             | 942(91.90)           | 368(91.60)          | 728(97.85)          | 628(93.59)          | 2666(94.24)          |                |
| <b>Smoking Status-Family member</b>                            |                      |                     |                     |                     |                      |                |
| Yes                                                            | 129(12.59)           | 55(14.14)           | 45(6.05)            | 102(15.20)          | 331(11.70)           | <0.0001        |
| No                                                             | 896(87.41)           | 334(85.86)          | 699(93.95)          | 569(84.80)          | 2498(83.30)          |                |
| <b>Indoor smoking – Family member</b>                          |                      |                     |                     |                     |                      |                |
| Yes                                                            | 84(8.20)             | 27(6.94)            | 27(3.63)            | 94(14.01)           | 232(8.20)            | <0.0001        |
| No                                                             | 941(91.80)           | 362(93.06)          | 717(96.37)          | 577(85.99)          | 2597(91.80)          |                |
| <b>Clinical Variables at the time of admission at hospital</b> | <b>n, Mean± SD</b>   | <b>n, Mean± SD</b>  | <b>n, Mean± SD</b>  | <b>n, Mean± SD</b>  | <b>n, Mean± SD</b>   | <b>p value</b> |
| Age (months)                                                   | 1025,<br>14.53±13.88 | 389,<br>10.69±10.95 | 744,<br>10.26±11.35 | 671,<br>12.30±13.29 | 2829,<br>12.35±12.85 | <0.0001        |
| Height (cm)                                                    | 303,<br>68.61±13.78  | 324,<br>70.66±13.75 | 34,<br>64.38±10.25  | 266,<br>70.46±12.14 | 927,<br>69.70±13.26  | <0.018         |
| Weight (Kg)                                                    | 1025,<br>7.96±2.97   | 389,<br>7.34±2.73   | 744,<br>7.11±2.78   | 671,<br>7.78±2.93   | 2829,<br>7.61±2.90   | <0.0001        |
| Fever Duration (days )                                         | 929,<br>4.46±2.71    | 321,<br>3.59±2.37   | 689,<br>4.25±2.52   | 569,<br>3.54±2.47   | 2508,<br>4.08±2.59   | <0.0001        |
| Oxygen saturation done n (%)                                   | 528(51.51)           | 343(88.17)          | 236(34.25)          | 319(56.06)          | 1426(50.40)          | <0.0001        |
| Oxygen Saturation ≤90 % n (%)                                  | 90 (17.04)           | 86 (26.79)          | 76(32.20)           | 49(15.36)           | 301(20.58)           | <0.0001        |

251

252 **Table 2** shows proportions of radiological pneumonia among cases hospitalized for CAP in four

253 participating districts. We observed statistically significant district-wise heterogeneity in

254 radiological abnormalities. We found higher proportion of radiological abnormalities in Patna

255 and Lucknow districts, which have a larger urban population, and lower proportion in Etawah

256 and Darbhanga districts, which in contrast have a larger rural population. We also observed

257 correspondingly higher proportion of PEP alone or with other infiltrates in districts of Lucknow

258 and Patna and lower in districts of Etawah and Darbhanga.

259

260 **Table 2** also describes univariate distribution of socio-demographic and clinical factors of CAP  
 261 among hospitalized children (2-59 months). Statistically significantly higher proportion of  
 262 females hospitalized for CAP had radiologically abnormal CXR. Likewise, statistically  
 263 significantly higher proportion of abnormal versus normal CXRs findings were reported in  
 264 hospitalized cases who had symptoms of fever, pallor, wheezing on auscultation, vomiting  
 265 everything or were malnourished.

267 **Table 2: Distribution of socio-demographic and clinical factors by chest radiograph**  
 268 **findings among hospitalized children from January 2015-April 2017**

|                                                               | Interpretable chest X rays |                         |                          |         | Abnormal chest X rays                                     |                                      |            |
|---------------------------------------------------------------|----------------------------|-------------------------|--------------------------|---------|-----------------------------------------------------------|--------------------------------------|------------|
|                                                               | N=2829                     | Normal<br>1852<br>n (%) | Abnormal<br>977<br>n (%) | p value | PEP* alone or<br>with other<br>infiltrate<br>635<br>n (%) | Other<br>infiltrates<br>342<br>n (%) | p<br>value |
| <b>Participating site</b><br>(row %)                          |                            |                         |                          |         |                                                           |                                      |            |
| Lucknow                                                       | 1025                       | 636<br>(62.05)          | 389<br>(37.95)           | <0.0001 | 282<br>(72.49)                                            | 107<br>(27.51)                       | <0.0001    |
| Etawah                                                        | 389                        | 275<br>(70.69)          | 114<br>(29.31)           |         | 73<br>(64.04)                                             | 41<br>(35.96)                        |            |
| Patna                                                         | 744                        | 457<br>(61.42)          | 287<br>(38.58)           |         | 184<br>(64.11)                                            | 103<br>(35.89)                       |            |
| Darbhangha                                                    | 671                        | 484<br>(72.13)          | 187<br>(27.87)           |         | 96<br>(51.34)                                             | 91<br>(48.66)                        |            |
| <b>Socio-demographic &amp; clinical factors</b><br>(column %) |                            |                         |                          |         |                                                           |                                      |            |
| <b>Age-group (months)</b>                                     |                            |                         |                          |         |                                                           |                                      |            |
| 2-11                                                          | 1865                       | 1223<br>(66.04)         | 642<br>(65.71)           | 0.86    | 409<br>(64.41)                                            | 233<br>(68.13)                       | 0.26       |
| 12-59                                                         | 964                        | 629<br>(33.96)          | 335<br>(34.29)           |         | 226<br>(35.59)                                            | 109<br>(31.87)                       |            |
| <b>Gender</b>                                                 |                            |                         |                          |         |                                                           |                                      |            |

1  
2  
3  
4  
5  
6  
7  
8  
9  
10  
11  
12  
13  
14  
15  
16  
17  
18  
19  
20  
21  
22  
23  
24  
25  
26  
27  
28  
29  
30  
31  
32  
33  
34  
35  
36  
37  
38  
39  
40  
41  
42  
43  
44  
45  
46  
47  
48  
49  
50  
51  
52  
53  
54  
55  
56  
57  
58  
59  
60

|                                                 |      |                      |                     |         |                     |                     |        |
|-------------------------------------------------|------|----------------------|---------------------|---------|---------------------|---------------------|--------|
| Male                                            | 2005 | 1354<br>(73.11)      | 651<br>(66.63)      | <0.0001 | 426<br>(67.09)      | 225<br>(65.79)      | 0.72   |
| Female                                          | 824  | 498<br>(26.89)       | 326<br>(33.37)      |         | 209<br>(32.91)      | 117<br>(34.21)      |        |
| <b>Place of residence</b>                       |      |                      |                     |         |                     |                     |        |
| Rural                                           | 1392 | 921<br>(49.73)       | 471<br>(48.21)      | 0.44    | 299<br>(47.09)      | 172<br>(50.29)      | 0.34   |
| Urban                                           | 1437 | 931<br>(50.27)       | 506<br>(51.79)      |         | 336<br>(52.91)      | 170<br>(49.71)      |        |
| <b>Biomass fuel</b>                             |      |                      |                     |         |                     |                     |        |
| Yes                                             | 1501 | 867<br>(46.81)       | 461<br>(47.19)      | 0.44    | 294<br>(42.30)      | 167<br>(48.83)      | 0.24   |
| No                                              | 1328 | 985<br>(53.19)       | 516<br>(52.81)      |         | 341<br>(53.70)      | 175<br>(51.17)      |        |
| <b>Immunization status</b>                      |      |                      |                     |         |                     |                     |        |
| Complete for age                                | 2347 | 1546<br>(83.48)      | 801<br>(81.99)      | 0.32    | 516<br>(81.26)      | 285<br>(83.33)      | 0.54   |
| Incomplete                                      | 482  | 306<br>(16.52)       | 176<br>(18.01)      |         | 119<br>(18.74)      | 57<br>(16.67)       |        |
| <b>Symptoms of pneumonia</b>                    |      |                      |                     |         |                     |                     |        |
| Fever                                           | 2499 | 1616<br>(87.26)      | 883<br>(90.38)      | 0.014   | 575<br>(90.55)      | 308<br>(90.06)      | 0.82   |
| Cyanosis                                        | 62   | 39<br>(2.11)         | 23<br>(2.35)        | 0.34    | 16<br>(2.52)        | 7<br>(2.05)         | 0.64   |
| Pallor                                          | 764  | 465<br>(25.11)       | 299<br>(30.60)      | 0.002   | 200<br>(31.50)      | 99<br>(28.95)       | 0.41   |
| Wheeze on auscultation                          | 2054 | 1377<br>(74.35)      | 677<br>(69.29)      | 0.005   | 415<br>(65.35)      | 262<br>(76.61)      | 0.0003 |
| Duration of illness fever [days] (n, Mean ± SD) | 2499 | 1611<br>3.91±2.51    | 888,<br>4.40±2.70   | <0.0001 | 577,<br>4.57±2.82   | 342,<br>4.08±2.44   | 0.011  |
| <b>Respiratory Rate and Fast Breathing</b>      |      |                      |                     |         |                     |                     |        |
| Respiratory Rate [2-11 months] (n, Mean ± SD)   | 1865 | 1243,<br>55.52±11.29 | 642,<br>57.99±11.70 | <0.0001 | 409,<br>58.12±11.88 | 233,<br>57.74±11.40 | 0.69   |
| Respiratory Rate [12-59 months] (n, Mean ± SD)  | 964  | 629,<br>49.78±12.41  | 335,<br>51.28±13.37 | 0.08    | 226,<br>51.35±13.31 | 109,<br>51.12±13.35 | 0.88   |
| Fast Breathing for age (2-11 months)            | 1735 | 1130<br>(61.02)      | 605<br>(61.92)      | 0.11    | 384<br>(60.47)      | 221<br>(64.62)      | 0.69   |
| Fast Breathing for                              | 862  | 562                  | 300                 | 0.92    | 204                 | 96                  | 0.53   |

1  
2  
3  
4  
5  
6  
7  
8  
9  
10  
11  
12  
13  
14  
15  
16  
17  
18  
19  
20  
21  
22  
23  
24  
25  
26  
27  
28  
29  
30  
31  
32  
33  
34  
35  
36  
37  
38  
39  
40  
41  
42  
43  
44  
45  
46  
47  
48  
49  
50  
51  
52  
53  
54  
55  
56  
57  
58  
59  
60

|                                  |      |                 |                |          |                |                |      |
|----------------------------------|------|-----------------|----------------|----------|----------------|----------------|------|
| age (12-59 months)               |      | (30.35)         | (30.71)        |          | (32.13)        | (28.07)        |      |
| <b>Danger Signs of pneumonia</b> |      |                 |                |          |                |                |      |
| Lethargy                         | 1101 | 732<br>(39.52)  | 369<br>(37.77) | 0.39     | 247<br>(38.90) | 122<br>(35.67) | 0.33 |
| Inability to drink               | 937  | 612<br>(33.05)  | 325<br>(33.27) | 0.46     | 211<br>(33.23) | 114<br>(33.33) | 0.97 |
| Convulsion                       | 148  | 98<br>(5.29)    | 50<br>(5.12)   | 0.93     | 33<br>(5.20)   | 17<br>(4.97)   | 0.87 |
| Cyanosis                         | 42   | 27<br>(1.46)    | 15<br>(1.54)   | 0.87     | 12<br>(1.89)   | 3<br>(0.88)    | 0.28 |
| <b>Malnutrition Status</b>       |      |                 |                |          |                |                |      |
| Normal *                         | 1880 | 1293<br>(69.82) | 587<br>(60.08) | < 0.0001 | 367<br>(57.80) | 220<br>(64.33) | 0.06 |
| Malnutrition*                    | 517  | 333<br>(17.98)  | 184<br>(18.83) |          | 122<br>(19.21) | 62<br>(18.13)  |      |
| Severe malnutrition*             | 432  | 226<br>(12.20)  | 206<br>(21.08) |          | 146<br>(22.99) | 60<br>(17.54)  |      |

\*Normal-weight of age z score > -2SD; Malnutrition-weight-for-age z ≤ -2SD and Severe malnutrition-weight-for- age z ≤ -3SD

**Table 3** describes four multivariate unconditional logistic regression models to find associates of abnormal CXR findings. After controlling for age, gender, symptoms of pneumonia, duration of illness, biomass fuel and malnutrition status of cases, statistically significant district-wise heterogeneity remained in the first three models. Models I, II and III had similar associates for radiological abnormalities whereas Model IV was different. Across all the four models, female gender and those with severe malnutrition had statistically significantly higher risk for having abnormal CXRs. A higher risk of radiological abnormalities was also observed in those children with longer duration of illness.

280  
281  
282  
283

284 **Table 3: Independent Associations between Chest Radiograph Findings and demographic**  
 285 **and clinical factors, among hospitalized children January 2015-April 2017**

| Variables                                      | Model – I<br>Abnormal/Normal <sup>Ref</sup> |         | Model – II<br>PEP alone or with<br>other infiltrate<br>/Normal <sup>Ref</sup> |         | Model – III<br>PEP alone / Normal <sup>Ref</sup> |         | Model – IV<br>Other infiltrate /<br>Normal <sup>Ref</sup> |            |
|------------------------------------------------|---------------------------------------------|---------|-------------------------------------------------------------------------------|---------|--------------------------------------------------|---------|-----------------------------------------------------------|------------|
|                                                | Adjusted<br>Odd Ratio<br>(95%CI)            | p value | Adjusted<br>Odd Ratio<br>(95%CI)                                              | p value | Adjusted<br>Odd Ratio<br>(95%CI)                 | p value | Adjusted<br>Odd Ratio<br>(95%CI)                          | P<br>value |
| <b>Districts</b>                               |                                             |         |                                                                               |         |                                                  |         |                                                           |            |
| Lucknow vs. Others                             | 1.58<br>(1.20-2.10)                         | <0.0001 | 2.07<br>(1.48-2.89)                                                           | <0.0001 | 2.20<br>(1.52-3.19)                              | <0.0001 | 0.98<br>(0.65-1.47)                                       | 0.93       |
| Etawah vs. Others                              | 1.22<br>(0.88-1.70)                         | 0.23    | 1.30<br>(0.87-1.95)                                                           | 0.19    | 1.49<br>(0.95-2.30)                              | 0.07    | 1.17<br>(0.74-1.87)                                       | 0.50       |
| Patna vs. Others                               | 1.67<br>(1.27-2.20)                         | <0.0001 | 1.89<br>(1.36-2.64)                                                           | <0.0001 | 2.25<br>(1.56-3.24)                              | <0.0001 | 1.39<br>(0.95-2.07)                                       | 0.09       |
| <b>Age – Group<br/>( months)</b>               |                                             |         |                                                                               |         |                                                  |         |                                                           |            |
| 2-11 <sup>Ref</sup>                            |                                             |         |                                                                               |         |                                                  |         |                                                           |            |
| 12-59                                          | 0.92<br>(0.77-1.10)                         | 0.34    | 0.95<br>(0.77-1.17)                                                           | 0.62    | 1.03<br>(0.82-1.29)                              | 0.79    | 0.86<br>(0.66-1.13)                                       | 0.27       |
| <b>Gender</b>                                  |                                             |         |                                                                               |         |                                                  |         |                                                           |            |
| Male <sup>Ref</sup>                            |                                             |         |                                                                               |         |                                                  |         |                                                           |            |
| Female                                         | 1.39<br>(1.16-1.66)                         | <0.0001 | 1.34<br>(1.08-1.65)                                                           | 0.008   | 1.28<br>(1.01-1.61)                              | 0.03    | 1.48<br>(1.14-1.92)                                       | 0.004      |
| <b>Symptoms of<br/>pneumonia<sup>¶</sup></b>   |                                             |         |                                                                               |         |                                                  |         |                                                           |            |
| Wheezing                                       | 0.83<br>(0.68-1.01)                         | 0.06    | 0.72<br>(0.57-0.90)                                                           | 0.005   | 0.75<br>(0.59-0.96)                              | 0.02    | 1.14<br>(0.83-1.55)                                       | 0.42       |
| Pallor                                         | 1.30<br>(1.08-1.58)                         | 0.006   | 1.28<br>(1.03-1.60)                                                           | 0.02    | 1.22<br>(0.95-1.55)                              | 0.12    | 1.34<br>(1.01-1.77)                                       | 0.04       |
| Vomiting<br>everything                         | 0.90<br>(0.75-1.09)                         | 0.28    | 0.80<br>(0.64-0.99)                                                           | 0.04    | 0.78<br>(0.62-1.01)                              | 0.05    | 1.09<br>(0.83-1.08)                                       | 0.51       |
| <b>Duration of illness,<br/>fever ( days )</b> | 1.06<br>(1.04-1.09)                         | <0.0001 | 1.08<br>(1.04-1.12)                                                           | <0.0001 | 1.08<br>(1.04-1.12)                              | <0.0001 | 1.03<br>(0.98-1.48)                                       | 0.24       |
| <b>Biomass fuel</b>                            | 1.28<br>(1.05-1.57)                         | 0.02    | 1.39<br>(1.10-1.76)                                                           | 0.006   | 1.40<br>(1.14-1.88)                              | 0.003   | 1.08<br>(0.79-1.45)                                       | 0.64       |
| <b>Malnutrition<br/>Status</b>                 |                                             |         |                                                                               |         |                                                  |         |                                                           |            |
| Normal <sup>*Ref</sup>                         |                                             |         |                                                                               |         |                                                  |         |                                                           |            |
| Malnutrition*                                  | 1.18<br>(0.93-1.45)                         | 0.15    | 1.17<br>(0.91-1.52)                                                           | 0.23    | 1.17<br>(0.88-1.55)                              | 0.27    | 1.12<br>(0.82-1.52)                                       | 0.47       |
| Severe<br>malnutrition*                        | 1.65<br>(1.31-2.09)                         | <0.0001 | 1.82<br>(1.34-2.36)                                                           | <0.0001 | 1.87<br>(1.41-2.47)                              | <0.0001 | 1.62<br>(1.71-2.23)                                       | 0.003      |

286 **Abbreviations used:** <sup>Ref</sup> Reference Category

287

288 **Footnotes:** <sup>¶</sup> No signs of pneumonia taken as a reference

289 \*Normal: weight-for-age z score > -2SD; Malnutrition: weight-for -age z ≤ -2SD; Severe

290 malnutrition: weight-for-age z ≤ -3SD

## 291 **DISCUSSION**

292 This prospective hospital-based surveillance study was conducted to assess the radiological  
293 abnormalities in children (2-59 months) residing in pre-specified districts of Uttar Pradesh and  
294 Bihar, India and hospitalized with CAP. The study was conducted from January 2015 to April  
295 2017, prior to introduction of PCV in the national immunization programme of the Government  
296 of India<sup>9</sup>.

297  
298 In our study, among interpretable CXRs, we found 22.44% (635/2829) children had PEP alone  
299 or with infiltrates, other infiltrates only 12.09%(342/2829) and 65.46% (1852/2829) had normal  
300 CXRs findings. Our study used WHO case definition for CAP<sup>19</sup>. A panel of three trained  
301 radiologists interpreted CXRs, adopting WHO recommended methodology<sup>11 12</sup>. These make our  
302 study methodology robust and results generalizable.

303  
304 There were 88.54% (2829/3195) interpretable CXRs in the current study. This is similar to 83%  
305 (3587/3973) interpretable CXRs reported by Pneumonia Etiology Research for Child Health  
306 (PERCH) study conducted on 4232 children (1-59 months) to assess the etiology of CAP in nine  
307 sites of seven countries<sup>27</sup>. Consistent with PERCH findings, a vaccine probe trial conducted in  
308 Gambia found the proportion of interpretable CXRs among unvaccinated cases of pneumonia to  
309 be 84.32% (242/287)<sup>28</sup>.

310  
311 There have been several studies in the past two decades, which have reported CXRs findings in  
312 hospitalized cases of CAP. Almost all of these were conducted before the introduction of PCV in  
313 their respective regions. A small prospective study conducted in Ethiopia reported radiological

1  
2  
3 314 abnormality in CXRs in 48.3% (95% CI 39.49-57.22) among 122 children (3 months-14 years)  
4  
5 315 clinically diagnosed with WHO-defined severe pneumonia<sup>29</sup>. Similar findings were reported  
6  
7 316 from the Gambian vaccine probe trial where the proportion of radiological abnormality was 45%  
8  
9  
10 317 (95% CI: 43.35-46.46) among unvaccinated hospitalized cases of clinical pneumonia<sup>28</sup>. PERCH  
11  
12 318 study found that 54% (95% CI: 52.31-55.57) of CXRs among cases of CAP were abnormal <sup>27</sup>.  
13  
14 319 In all of these studies, proportion of cases with abnormal CXRs is higher than 34.5% (95% CI  
15  
16 320 32.8-36.3) found by us in the current study. However, our findings are similar to PERCH rural  
17  
18 321 study site of Matlab, Bangladesh that reported radiological abnormality in 35.3% (95% CI:  
19  
20 322 29.77-40.85) CXRs of hospitalized cases of CAP <sup>27</sup>. Another PERCH urban site of Dhaka,  
21  
22 323 Bangladesh reported 63.10% (95% CI 56.18 -70.02) cases with abnormal CXRs <sup>27</sup>. In our study,  
23  
24 324 radiological abnormalities in CXRs were higher in cases from largely urban districts of Patna and  
25  
26 325 Lucknow compared to rural districts of Darbhanga and Etawah. This is consistent with rural-  
27  
28 326 urban differences in Bangladesh sites of PERCH. Variation in CXR findings among cases of  
29  
30 327 CAP may be due to infecting organism, immune response of patient and prior duration of  
31  
32 328 disease.

33  
34  
35  
36  
37  
38 329  
39  
40 330 In 2016, WHO's Department of Immunization, Vaccines and Biologicals standardized the  
41  
42 331 categorization of radiological pneumonia and established that PEP can be taken as a good  
43  
44 332 surrogate marker of SP in epidemiological and vaccine efficacy studies<sup>12</sup>. In our study, 22.44 %  
45  
46 333 (95% C.I. 20.90 -23.98), CXRs were having PEP alone or with other infiltrates. This is similar to  
47  
48 334 PERCH study that reported PEP alone or with other infiltrates in 27% (95% C.I. 25.50 -28.40)  
49  
50 335 hospitalized cases of CAP<sup>27</sup>. Another study conducted in Gambia reported that 45% (95% CI:  
51  
52 336 43.35-46.46) non-vaccinated children had PEP and/or other infiltrates <sup>28</sup>. PEP has been



1  
2  
3 337 associated with increased risk of treatment failure ( $p=0.002$ ), increased length of hospitalization  
4  
5 338 ( $p=0.0003$ ) and more days of respiratory support ( $p=0.002$ ) in Botswana when compared with  
6  
7 339 cases reporting 'no significant pathology' on CXRs<sup>30</sup>.  
8  
9

10 340  
11  
12 341 In our study, female gender ( $p<0.001$ ) was at the higher risk of developing radiological  
13  
14 342 abnormalities compared to males (**table 3**). The results are in concordance with a hospital-based  
15  
16 343 case-control study carried out in Brazil that reported male gender as a protective factor against  
17  
18 344 pneumonia (OR = 0.53; 95 % CI 0.39–0.72)<sup>31</sup>. Another study in Mozambique, Africa reported  
19  
20 345 that male gender was not significantly associated with presence of radiological abnormalities  
21  
22 346 (OR =0.77; 95 % CI 0.56–1.05) in children (0-59 months) suffering from severe pneumonia<sup>32</sup>.  
23  
24 347 However, in contrast, a Gambian study reported male preponderance for all pneumonia that was  
25  
26 348 most marked for 'other infiltrates/abnormalities' pneumonia<sup>28</sup>.  
27  
28  
29  
30

31 349  
32  
33 350 In our study, it was observed that there was differential care-seeking by gender for CAP in all  
34  
35 351 four project sites. Although females admitted with CAP were at higher risk of having  
36  
37 352 radiological abnormalities, lower proportion were hospitalized for it. Gender inequality in health  
38  
39 353 care seeking for females is common in India, as in other South Asian countries<sup>33 34</sup>. Since there  
40  
41 354 is no health-care financing or health insurance provision in India, in case of severe illness,  
42  
43 355 parents are less likely to incur out-of-pocket expenditure or incur debts to pay expenses on  
44  
45 356 medical treatment of their daughters compared to sons<sup>35</sup>. Another Indian study found that male  
46  
47 357 children were five times more likely to be taken early for medical care and three times more  
48  
49 358 likely to be seen by qualified medical doctors compared to female children<sup>36</sup>. We also found  
50  
51  
52  
53  
54  
55  
56  
57  
58  
59  
60

1  
2  
3 359 that majority of hospitalized cases of pneumonia were from urban areas, in contrast with  
4  
5 360 observations of other researchers who report poor health care seeking from rural areas<sup>37</sup>.

6  
7  
8 361  
9  
10 362 A systematic review with meta-analysis conducted in 2019 suggests that no one clinical feature  
11  
12 363 is sufficient on its own to diagnose radiological pneumonia <sup>38</sup>. However other socio-  
13  
14 364 demographic and clinical correlates of abnormal CXRs found by us (Model 1), which increased  
15  
16 365 the risk of radiological abnormalities, were presence of pallor, severe malnutrition, longer  
17  
18 366 duration of illness and exposure to biomass fuel. Exposure to biomass fuel used for cooking is an  
19  
20 367 important factor that increases the risk of CAP in developing countries<sup>39</sup>. In rural India, majority  
21  
22 368 of the households use biomass fuel like firewood, dung cakes and wood for cooking <sup>40</sup>. Young  
23  
24 369 children are at risk to adverse effects of exposure to biomass fuel as either the households have  
25  
26 370 no separate cooking space or have poor ventilation and sometimes young children stay with their  
27  
28 371 mother while she cooks.  
29  
30

31  
32  
33 372  
34  
35 373 Other correlates of PEP/Radiological Pneumonia (Models II and III) possibly due to SP, besides  
36  
37 374 those found in Model I, were presence of vomiting everything and wheeze on auscultation, both  
38  
39 375 of which were found to be protective. These symptoms/signs are more often reported in viral  
40  
41 376 pneumonia<sup>41</sup>. Correlates of radiological abnormalities of 'other infiltrates' (Model IV), which  
42  
43 377 increased the risk, were again female gender, pallor and severe malnutrition. Hence it is difficult  
44  
45 378 to attribute radiological findings of other infiltrates to either bacterial or viral etiology.  
46  
47  
48

49 379  
50  
51 380 Based on our study, almost two-third hospitalized cases of CAP had normal CXRs and this could  
52  
53 381 be perhaps of viral etiology. This is supported by a recent study that reported 61.4% (95% CI  
54  
55  
56  
57  
58  
59  
60

1  
2  
3 382 57·3–65·6) cases to be viral<sup>41</sup>. Among one-third of cases of CAP had abnormal CXRs and thus  
4  
5 383 were more likely to be bacterial in etiology, two-thirds of which were possibly due to SP.  
6  
7

8 384  
9  
10 385 In India, 13-valent PCV is given using a three dose schedule (2 primary and one booster) at 6  
11  
12 386 weeks, 14 weeks and 9 months of age. PCV 13 provides coverage against 13 serotypes (1, 3, 4,  
13  
14 387 5, 6A, 6B, 7F, 9V, 14, 18C, 19A, 19F and 23F) causing pneumococcal pneumonia<sup>42</sup>. Several  
15  
16 388 studies have assessed serotype distribution of pneumococcal disease among children in India. A  
17  
18 389 study conducted in Vellore, India found that the most common serotypes causing invasive  
19  
20 390 infections among under-five children were 14, 19F, 5, 6A and 6B, all of which were covered by  
21  
22 391 the 13-valent PCV <sup>43</sup>. Another population-based surveillance study conducted in rural  
23  
24 392 Bangladesh found that the most common serotypes were 1, 5, 14, 18C and 19A and 38 and these  
25  
26 393 comprised more than three-fourth of the *S. pneumoniae* isolates <sup>44</sup>. A systematic review and  
27  
28 394 meta-analysis of data collected on Invasive Pneumococcal Disease serotypes from under-five  
29  
30 395 children during the pre-PCV period (between 1980–2007) found that serotypes included in both  
31  
32 396 the 10-valent and 13-valent PCVs accounted for 10 million cases and 600,000 deaths  
33  
34 397 worldwide<sup>45</sup>.  
35  
36  
37  
38  
39  
40  
41  
42

43 399 Several strengths of the study are worth-noting. This was a prospective, multi-site study where  
44  
45 400 recruitments were done from a large hospital surveillance network established especially for the  
46  
47 401 study in four districts of two Indian states that have high under-five mortality rates. Standard  
48  
49 402 WHO definition was used to identify hospitalized cases of CAP. Radiological abnormalities  
50  
51 403 were interpreted by a panel of three trained radiologists at locations out of the surveillance  
52  
53 404 network, blinded to each other as well as clinical features of the case. Despite these strengths,  
54  
55  
56  
57  
58  
59  
60

1  
2  
3 405 our study findings have certain limitations. First, in our study, pre-existing x-rays machines  
4  
5 406 which were not of uniform specification, were used. This might have caused variation in quality  
6  
7 407 of CXR images, though this error was minimized by digitizing the CXR images centrally.  
8  
9  
10 408 Secondly, in our study, clinical data collection was recorded by physicians in the network  
11  
12 409 hospitals and this could be subject to observer bias. However, the primary outcome of the study  
13  
14 410 was radiological findings of CXRs of cases admitted with CAP. This was not subject to bias. In  
15  
16 411 this study, we have not collected information on use of antibiotic prior to hospitalization; as such  
17  
18 412 information is not available reliably. However, in another study, done in one of the network  
19  
20 413 hospitals of Lucknow in the recent past, it was found that 70.5% children tested positive for  
21  
22 414 antibiotics on urine examination<sup>46</sup>.  
23  
24  
25  
26  
27 415  
28  
29

## 30 416 **CONCLUSION**

31  
32  
33 417 Among hospitalized cases of community-acquired pneumonia, almost one-third children had  
34  
35 418 abnormal chest radiographs of which about two-thirds had abnormalities related with possible  
36  
37 419 bacterial etiology (SP). Hence, the introduction of pneumococcal vaccination is likely to reduce  
38  
39 420 the burden of childhood pneumonia in India. Since the study was done prior to the introduction  
40  
41 421 of PCV in India, continued surveillance will be required to assess the impact of PCV on  
42  
43 422 radiological findings in cases admitted with CAP. The impact of introduction of PCV in the  
44  
45 423 national immunization programme on under-five mortality rate and burden of CAP needs to be  
46  
47 424 assessed.  
48  
49  
50  
51 425  
52  
53  
54  
55  
56  
57  
58  
59

1  
2  
3 426 **Acknowledgements:** We thank the state governments of Uttar Pradesh and Bihar for giving  
4  
5  
6 427 us permission to conduct the study. We extend our gratitude to participating tertiary and  
7  
8 428 secondary care hospitals for their contribution in the study. We offer thanks to Dr. Kamrun  
9  
10 429 Nahar from the International Centre for Diarrhoeal Disease Research, Bangladesh for imparting  
11  
12 430 training to the panel of study radiologists. Members of the Lucknow Community-Acquired  
13  
14 431 Pneumonia (CAP) Group: King George's Medical University (KGMU), Lucknow, India: Prof.  
15  
16 432 Shally Awasthi, Department of Pediatrics, Prof. Neera Kohli, Department of Radio-diagnosis,  
17  
18 433 Prof. Monica Agarwal, Department of Community Medicine; Mr. Puneet Dhasmana, Project  
19  
20 434 Staff; Patna Medical College and Hospital, Patna, Bihar-Prof. Neelam Verma and Prof. Chandra  
21  
22 435 Bhushan Kumar, Department of Pediatrics; Darbhanga Medical College and Hospital,  
23  
24 436 Darbhanga, Bihar, India- Prof. Chittaranjan Roy, Department of Community Medicine, Prof.  
25  
26 437 Kripanath Mishra, Department of Pediatrics; Uttar Pradesh University of Medical Sciences,  
27  
28 438 Etawah, Uttar Pradesh, India- Prof. Pankaj Kumar Jain, Department of Community Medicine,  
29  
30 439 Prof. Rajesh Yadav, Department of Pediatrics.

31  
32 440 **Contributors:** The study was conceived and designed by SA. CAP study group performed data  
33  
34 441 acquisition. CMP and NM<sup>3</sup> conducted the statistical analysis of the data. The paper was written by  
35  
36 442 SA, TR, MA and CMP. AC, NM<sup>5</sup>, RCS and NK interpreted chest x-rays. All authors were  
37  
38 443 involved with drafting and revising the work and approved the final submission.

39  
40 444 **Funding statement:** The study was supported by Bill & Melinda Gates Foundation  
41  
42 445 (<https://www.gatesfoundation.org/>) via Grant No: OPP1118005. Funding agency had no role in  
43  
44 446 the design of the study and collection, analysis and interpretation of data, or in writing the  
45  
46 447 manuscript.

47  
48 448 **Competing interests:** None declared.  
49  
50  
51  
52  
53  
54  
55  
56  
57  
58  
59  
60

1  
2  
3 449 **Patient consent for publication:** Not required.  
4

5 450 **Ethics approval:** The Institutional Ethics Committee of King George's Medical University  
6  
7 451 (Lucknow), The Uttar Pradesh University of Medical Sciences (Etawah), Patna Medical College  
8  
9 452 and Hospital (Patna) and Darbhanga Medical College and Hospital (Darbhanga) gave ethical  
10  
11 453 approval for the conduct of study.  
12  
13

14 454 **Provenance and peer review:** Not commissioned; externally peer reviewed.  
15

16  
17 455 **Data sharing statement:** The data contained within this study can be obtained by writing to  
18  
19 456 [shally07@gmail.com](mailto:shally07@gmail.com)  
20

21 457 **Copyright information:** This is an Open Access article distributed in accordance with the  
22  
23 458 Creative Commons Attribution Non Commercial (CC BY-NC 4.0) license, which permits others  
24  
25 459 to distribute, remix, adapt, build upon this work non-commercially, and license their derivative  
26  
27 460 works on different terms, provided the original work is properly cited and the use is non-  
28  
29 461 commercial. See: <http://creativecommons.org/licenses/by-nc/4.0/>  
30  
31  
32

### 33 462

### 35 463 **Supporting Information**

36  
37 464 S1 Appendix: Chest radiograph interpretation form  
38  
39  
40  
41 465

## 42 43 466 **REFERENCES:**

- 44  
45  
46  
47 467 1. UNICEF U. Levels and trends in child mortality. Estimates developed by the UN inter-  
48  
49 468 agency group for child mortality estimation. 2011.  
50  
51 469 2. Amouzou A, Velez LC, Tarekegn H, *et al.* One is too many: ending child deaths from  
52  
53 470 pneumonia and diarrhoea. New York: Unicef, 2016. pp 73–75  
54  
55  
56  
57  
58  
59  
60

- 1  
2  
3 471 3. Mathew JL, Patwari AK, Gupta P, *et al.* Acute respiratory infection and pneumonia in India:  
4  
5 472 a systematic review of literature for advocacy and action: UNICEF-PHFI series on newborn  
6  
7 473 and child health, India. *Indian Pediatr* 2011; 48: 191–218.
- 8  
9  
10 474 4. Farooqui H, Jit M, Heymann DL, *et al.* Burden of severe pneumonia, pneumococcal  
11  
12 475 pneumonia and pneumonia deaths in Indian states: modelling based estimates. *PLoS One*  
13  
14 476 2015
- 15  
16  
17 477 5. Rudan I, O'brien KL, Nair H, *et al.* Epidemiology and etiology of childhood pneumonia in  
18  
19 478 2010: estimates of incidence, severe morbidity, mortality, underlying risk factors and  
20  
21 479 causative pathogens for 192 countries. *Journal of global health.* 2013 Jun;3(1).
- 22  
23  
24 480 6. Leung DT, Chisti MJ, Pavia AT. Prevention and control of childhood pneumonia and  
25  
26 481 diarrhea. *Pediatric Clinics.* 2016 Feb 1;63(1):67-79.
- 27  
28  
29 482 7. Virkki R, Juven T, Rikalainen H, *et al.* Differentiation of bacterial and viral pneumonia in  
30  
31 483 children. *Thorax.* 2002 May 1;57(5):438-41.
- 32  
33 484 8. World Health Organization. Pneumococcal conjugate vaccines in infants and children under  
34  
35 485 5 years of age: WHO position paper–February 2019. Accessed 12th July 2019.
- 36  
37  
38 486 9. Government of India. Introduction of Pneumococcal Conjugate Vaccine: Operational  
39  
40 487 Guidelines. Ministry of Health and Family Welfare, 2017 Available at:  
41  
42 488 [https://nhm.gov.in/New\\_Updates\\_2018/NHM\\_Components/Immunization/Guidelines\\_for\\_i](https://nhm.gov.in/New_Updates_2018/NHM_Components/Immunization/Guidelines_for_immunization/Operational_Guidelines_for_PCV_introduction.pdf)  
43  
44 489 [mmunization/Operational\\_Guidelines\\_for\\_PCV\\_introduction.pdf](https://nhm.gov.in/New_Updates_2018/NHM_Components/Immunization/Guidelines_for_immunization/Operational_Guidelines_for_PCV_introduction.pdf). Assessed 12 July 2019.
- 45  
46  
47 490 10. Cherian T, Mulholland EK, Carlin JB, *et al.* Standardized interpretation of paediatric chest  
48  
49 491 radiographs for the diagnosis of pneumonia in epidemiological studies. *Bulletin of the World*  
50  
51 492 *Health Organization.* 2005;83:353-9

- 1  
2  
3 493 11. Pneumonia Vaccine Trial Investigators' Group. Standardization of Interpretation of Chest  
4  
5 494 Radiographs for the Diagnosis of Pneumonia in Children. Geneva: Department of Vaccines  
6  
7  
8 495 and Biologicals, World Health Organization; 2001  
9
- 10 496 12. Mahomed N, Fancourt N, De Campo J, *et al.* Preliminary report from the World Health  
11  
12 497 Organization chest radiography in epidemiological studies project. *Pediatric radiology*. 2017  
13  
14 498 Oct 1;47(11):1399-404.  
15
- 16  
17 499 13. Greenberg D, Givon-Lavi N, Ben-Shimol S, *et al.* Impact of PCV7/PCV13 introduction on  
18  
19 500 community-acquired alveolar pneumonia in children < 5 years. *Vaccine*. 2015 Aug  
20  
21 501 26;33(36):4623-9. 6.  
22
- 23  
24 502 14. Sutcliffe CG, Shet A, Varghese R, *et al.* Nasopharyngeal carriage of *Streptococcus*  
25  
26 503 *pneumoniae* serotypes among children in India prior to the introduction of pneumococcal  
27  
28 504 conjugate vaccines: a cross-sectional study. *BMC Infect Dis*. 2019 Dec;19(1):605.  
29
- 30  
31 505 15. Annual health survey (AHS) factsheet 2012–13 Uttar Pradesh [Internet]. New Delhi: Office  
32  
33 506 of Registrar General & Census Commissioner, Ministry of Home Affairs, Government of  
34  
35 507 India; 2010–2011. Available  
36  
37 508 from:[http://www.censusindia.gov.in/vital\\_statistics/AHSBulletins/AHS\\_Factsheets\\_2012-](http://www.censusindia.gov.in/vital_statistics/AHSBulletins/AHS_Factsheets_2012-13/FACTSHEET-UTTAR_PRADESH.pdf)  
38  
39 509 [13/FACTSHEET-UTTAR\\_PRADESH.pdf](http://www.censusindia.gov.in/vital_statistics/AHSBulletins/AHS_Factsheets_2012-13/FACTSHEET-UTTAR_PRADESH.pdf). Assessed 5<sup>th</sup> August, 2019.  
40  
41
- 42 510 16. Annual health survey (AHS) factsheet 2012–13 Bihar [Internet]. New Delhi: Office of  
43  
44 511 Registrar General & Census Commissioner, Ministry of Home Affairs, Government of India;  
45  
46 512 2010–2011. Available  
47  
48 513 from:[http://www.censusindia.gov.in/vital\\_statistics/AHSBulletins/AHS\\_Factsheets\\_2012-](http://www.censusindia.gov.in/vital_statistics/AHSBulletins/AHS_Factsheets_2012-13/FACTSHEET-Bihar.pdf)  
49  
50 514 [13/FACTSHEET-Bihar.pdf](http://www.censusindia.gov.in/vital_statistics/AHSBulletins/AHS_Factsheets_2012-13/FACTSHEET-Bihar.pdf). Assessed 5<sup>th</sup> August, 2019.  
51  
52  
53  
54  
55  
56  
57  
58  
59  
60



- 1  
2  
3 515 17. Awasthi S, Pandey CM, Verma T, *et al.* Incidence of community-acquired pneumonia in  
4  
5 516 children aged 2-59 months of age in Uttar Pradesh and Bihar, India, in 2016: An indirect  
6  
7 517 estimation. *PloS one*. 2019 Mar 20;14(3):e0214086.  
8  
9  
10 518 18. Awasthi S, Singh JV, Kohli N, *et al.* Hospital-based surveillance for radiological pneumonia  
11  
12 519 in children under 5 years of age in Uttar Pradesh and Bihar. *Pediatric Infectious Disease*.  
13  
14 520 2016 Jun 30;8(2):52-7.  
15  
16  
17 521 19. World Health Organization. Pocket Book of Hospital Care for Children: Guidelines for the  
18  
19 522 Management of Common Childhood Illnesses. 2nd edn. Geneva, Switzerland: World Health  
20  
21 523 Organization, 2013.  
22  
23  
24 524 20. Charan J, Biswas T. How to calculate sample size for different study designs in medical  
25  
26 525 research?. *Indian journal of psychological medicine*. 2013 Apr;35(2):121.  
27  
28  
29 526 21. Integrated Management of Childhood Illness (IMCI) Chart Booklet [online] Geneva: World  
30  
31 527 Health Organization. Available at:  
32  
33 528 [https://apps.who.int/iris/bitstream/handle/10665/104772/9789241506823\\_Chartbook\\_eng.pdf](https://apps.who.int/iris/bitstream/handle/10665/104772/9789241506823_Chartbook_eng.pdf)  
34  
35 529 Accessed: 19<sup>th</sup> December, 2019.  
36  
37  
38 530 22. Bassignani MJ, Bubash-Faust L, Ciambotti J, *et al.* Conversion of teaching file cases from  
39  
40 531 film to digital format: a comparison between use of a diagnostic-quality digitizer and use of a  
41  
42 532 flatbed scanner with transparency adapter. *Acad Radiol*. 2003 May 1;10(5):536-42.  
43  
44  
45 533 23. World Health Organization. The WHO Anthro Survey Analyser. In: World Health  
46  
47 534 Organization [Internet]. Available: <https://www.who.int/nutgrowthdb/software/en/>.  
48  
49 535 Accessed: 10<sup>th</sup> June, 2019.  
50  
51  
52  
53  
54  
55  
56  
57  
58  
59  
60

- 1  
2  
3 536 24. Horton NJ, Kleinman KP. Much ado about nothing: A comparison of missing data methods  
4  
5 537 and software to fit incomplete data regression models. *The American Statistician*. 2007 Feb  
6  
7 538 1;61(1):79-90.
- 9  
10 539 25. SPSS Inc. Released 2009. SPSS for Windows [software], Version 22.0. Chicago, SPSS Inc.  
11  
12 540 Available from:[www.spss.com](http://www.spss.com)
- 14  
15 541 26. von Elm E, Altman DG, Egger M, et al. The strengthening the reporting of observational  
16  
17 542 studies in epidemiology (STROBE) statement: guidelines for reporting observational studies.  
18  
19 543 *J Clin Epidemiol* 2008;61:344–9
- 21  
22 544 27. Fancourt N, Deloria Knoll M, Baggett HC, *et al*. Chest radiograph findings in childhood  
23  
24 545 pneumonia cases from the multisite PERCH study. *Clin Infect Dis*. 2017 May  
25  
26 546 29;64(suppl\_3):S262-70
- 28  
29 547 28. Enwere G, Cheung YB, Zaman SM, *et al*. Epidemiology and clinical features of pneumonia  
30  
31 548 according to radiographic findings in Gambian children. *Trop Med Int Health*. 2007  
32  
33 549 Nov;12(11):1377-85.
- 35  
36 550 29. Meiron Hassen, Alemayehu Toma, Mulugeta Tesfay, *et al*. Radiologic Diagnosis and  
37  
38 551 Hospitalization among Children with Severe Community Acquired Pneumonia: A  
39  
40 552 Prospective Cohort Study. *Biomed Res Int*, vol. 2019, Article ID 6202405, 8 pages, 2019.  
41  
42 553 <https://doi.org/10.1155/2019/6202405>.
- 44  
45 554 30. Kelly MS, Crotty EJ, Rattan MS, *et al*. Chest radiographic findings and outcomes of  
46  
47 555 pneumonia among children in Botswana. *Pediatr Infect Dis J*. 2016 Mar;35(3):257.
- 49  
50 556 31. da Fonseca Lima EJ, Mello MJ, Lopes MI, *et al*. Risk factors for community-acquired  
51  
52 557 pneumonia in children under five years of age in the post-pneumococcal conjugate vaccine  
53  
54 558 era in Brazil: a case control study. *BMC Pediatr*. 2016 Dec;16(1):157.

- 1  
2  
3 559 32. Sigauque B, Roca A, Bassat Q, *et al.* Severe pneumonia in Mozambican young children:  
4  
5 560 clinical and radiological characteristics and risk factors. *J Trop Pediatr.* 2009 Apr  
6  
7 561 28;55(6):379-87.
- 8  
9  
10 562 33. Ismail SA, McCullough A, Guo S, *et al.* Gender-related differences in care-seeking  
11  
12 563 behaviour for newborns: a systematic review of the evidence in South Asia. *BMJ global*  
13  
14 564 health. 2019 May 1;4(3):e001309.
- 15  
16  
17 565 34. Fikree FF, Pasha O. Role of gender in health disparity: the South Asian context. *BMJ*  
18  
19 566 2004;328:823–6. 10.1136/bmj.328.7443.823
- 20  
21  
22 567 35. Asfaw A, Lamanna F, Klasen S. Gender gap in parents' financing strategy for hospitalization  
23  
24 568 of their children: evidence from India. *Health economics.* 2010 Mar;19(3):265-79.
- 25  
26 569 36. Pandey A, Sengupta PG, Mondal SK, *et al.* Gender differences in healthcare-seeking during  
27  
28 570 common illnesses in a rural community of West Bengal, India. *Journal of Health, Population*  
29  
30 571 and Nutrition. 2002 Dec 1:306-11.
- 31  
32  
33 572 37. Jana A, Basu R. Examining the changing health care seeking behavior in the era of health  
34  
35 573 sector reforms in India: evidences from the National Sample Surveys 2004 & 2014. *Global*  
36  
37 574 health research and policy. 2017 Dec;2(1):6.
- 38  
39  
40 575 38. Rambaud-Althaus C, Althaus F, Genton B, *et al.* Clinical features for diagnosis of  
41  
42 576 pneumonia in children younger than 5 years: a systematic review and meta-analysis. *Lancet*  
43  
44 577 *Infect Dis.* 2015 Apr 1;15(4):439-50
- 45  
46  
47 578 39. Awasthi S, Glick AH, Fletcher RH. Effect of cooking fuels on Respiratory Diseases in Pre-  
48  
49 579 school children in Lucknow, India. *Am J Trop Med Hyg* 1996; 55: 48-51
- 50  
51  
52  
53  
54  
55  
56  
57  
58  
59  
60

- 1  
2  
3 580 40. Tielsch JM, Katz J, Thulasiraj RD, *et al.* Exposure to indoor biomass fuel and tobacco smoke  
4  
5 581 and risk of adverse reproductive outcomes, mortality, respiratory morbidity and growth  
6  
7 582 among newborn infants in south India. *Int J Epidemiol.* 2009 Sep 16;38(5):1351-63.
- 8  
9  
10 583 41. O'Brien KL, Baggett HC, Brooks WA, *et al.* Causes of severe pneumonia requiring hospital  
11  
12 584 admission in children without HIV infection from Africa and Asia: the PERCH multi-country  
13  
14 585 case-control study. *The Lancet.* 2019 Jun 27
- 15  
16  
17 586 42. World Health Organization. Pneumococcal conjugate vaccines in infants and children under  
18  
19 587 5 years of age: WHO position paper—February 2019. Accessed 12th March. 2019.
- 20  
21  
22 588 43. Balaji V, Jayaraman R, Verghese VP, Baliga PR, Kurien T. Pneumococcal serotypes  
23  
24 589 associated with invasive disease in under five children in India & implications for vaccine  
25  
26 590 policy. *The Indian journal of medical research.* 2015 Sep;142(3):286.
- 27  
28  
29 591 44. Arifeen SE, Saha SK, Rahman S, Rahman KM, Rahman SM, Bari S, Naheed A, Mannan I,  
30  
31 592 Seraji MH, Ahmed NU, Shameem Hassan M. Invasive pneumococcal disease among  
32  
33 593 children in rural Bangladesh: results from a population-based surveillance. *Clinical*  
34  
35 594 *Infectious Diseases.* 2009 Mar 1;48 (Supplement\_2):S103-13.
- 36  
37  
38 595 45. Johnson HL, Deloria-Knoll M, Levine OS, Stoszek SK, Hance LF, Reithinger R, Muenz LR,  
39  
40 596 O'Brien KL. Systematic evaluation of serotypes causing invasive pneumococcal disease  
41  
42 597 among children under five: the pneumococcal global serotype project. *PLoS medicine.* 2010  
43  
44 598 Oct 5;7(10):e1000348
- 45  
46  
47 599 46. Bénet T, Picot VS, Awasthi S, Pandey N, Bavdekar A, Kawade A, Robinson A, Rakoto-  
48  
49 600 Andrianarivelo M, Sylla M, Diallo S, Russomando G. Severity of pneumonia in under 5-  
50  
51 601 year-old children from developing countries: a multicenter, prospective, observational study.  
52  
53 602 *The American journal of tropical medicine and hygiene.* 2017 Jul 12;97(1):68-76

1  
2  
3 603  
4  
5 604 **Figure Legend**  
6  
7 605 Figure 1: Flow diagram of cases of community acquired pneumonia recruited from participating  
8  
9 606 districts before the introduction of pneumococcal conjugate vaccine (January 2015-April 2017)  
10  
11  
12  
13  
14  
15  
16  
17  
18  
19  
20  
21  
22  
23  
24  
25  
26  
27  
28  
29  
30  
31  
32  
33  
34  
35  
36  
37  
38  
39  
40  
41  
42  
43  
44  
45  
46  
47  
48  
49  
50  
51  
52  
53  
54  
55  
56  
57  
58  
59  
60

For peer review only

Figure 1: Flow diagram of cases of community acquired pneumonia recruited from participating districts before introduction of pneumococcal conjugate vaccine (January 2015-April 2017)

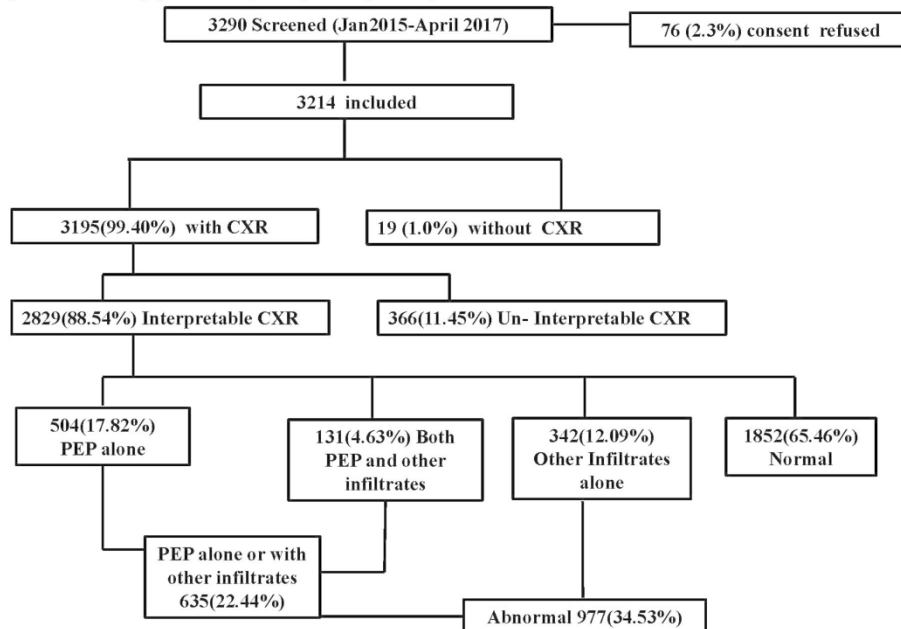

Figure 1: Flow diagram of cases of community acquired pneumonia recruited from participating districts before the introduction of pneumococcal conjugate vaccine (January 2015-April 2017)

254x190mm (300 x 300 DPI)

**Childhood Pneumonia Surveillance**  
Department of Paediatrics, KGMU, Lucknow ,UP

**Form-R**  
(RADIOLOGY REPORT FORM)

|    |                                        |                                                                                                                                                                                                                                                                                      |
|----|----------------------------------------|--------------------------------------------------------------------------------------------------------------------------------------------------------------------------------------------------------------------------------------------------------------------------------------|
| 1  | <b>Drs_ID</b>                          | [ ][ ][ ][ ]                                                                                                                                                                                                                                                                         |
|    | <b>Radiology Report</b>                | <b>Patient Details</b>                                                                                                                                                                                                                                                               |
| 2  | <b>IDNo:</b>                           | [ ] / [ ] / [ ][ ][ ][ ][ ][ ]<br>State /District / Unit / Subject number<br>(For office use)                                                                                                                                                                                        |
| 2  | <b>Date Of Report</b>                  | [ ][ ]/[ ][ ]/[ ][ ][ ][ ] (DD/MM/YYYY)                                                                                                                                                                                                                                              |
|    | <b>Report Details</b>                  | <b>Findings ( tick one)</b>                                                                                                                                                                                                                                                          |
| 3  | <b>Image Quality</b>                   | Adequate <input type="checkbox"/> Suboptimal <input type="checkbox"/> Un-interpretable <input type="checkbox"/>                                                                                                                                                                      |
| 4  | <b>Significant Pathology</b>           | Yes <input type="checkbox"/> No <input type="checkbox"/> Un-interpretable <input type="checkbox"/>                                                                                                                                                                                   |
| 5  | <b>End Point Consolidation</b>         |                                                                                                                                                                                                                                                                                      |
| 5a | Left                                   | Yes <input type="checkbox"/> No <input type="checkbox"/> Un-interpretable <input type="checkbox"/>                                                                                                                                                                                   |
| 5b | Right                                  | Yes <input type="checkbox"/> No <input type="checkbox"/> Un-interpretable <input type="checkbox"/>                                                                                                                                                                                   |
|    |                                        | Uninterpretable                                                                                                                                                                                                                                                                      |
| 6  | <b>Other Infiltrates/Abnormalities</b> |                                                                                                                                                                                                                                                                                      |
| 6a | Left                                   | Yes <input type="checkbox"/> No <input type="checkbox"/> Un-interpretable <input type="checkbox"/>                                                                                                                                                                                   |
| 6b | Right                                  | Yes <input type="checkbox"/> No <input type="checkbox"/> Un-interpretable <input type="checkbox"/>                                                                                                                                                                                   |
| 7  | <b>Pleural Fluid</b>                   |                                                                                                                                                                                                                                                                                      |
| 7a | Left                                   | Yes <input type="checkbox"/> No <input type="checkbox"/> Un-interpretable <input type="checkbox"/>                                                                                                                                                                                   |
| 7b | Right                                  | Yes <input type="checkbox"/> No <input type="checkbox"/> Un-interpretable <input type="checkbox"/>                                                                                                                                                                                   |
| 8  | <b>Comments:</b>                       | <input type="text"/>                                                                                                                                                                                                                                                                 |
| 9  | <b>Conclusion:</b>                     | a) Primary endpoint pneumonia only <input type="checkbox"/><br>b) Other infiltrate only <input type="checkbox"/><br>c) Both PEP and other infiltrate <input type="checkbox"/><br>d) Normal <input type="checkbox"/><br>e) Un-interpretable for any findings <input type="checkbox"/> |

1  
2  
3  
4  
5  
6  
7  
8  
9  
10  
11  
12  
13  
14  
15  
16  
17  
18  
19  
20  
21  
22  
23  
24  
25  
26  
27  
28  
29  
30  
31  
32  
33  
34  
35  
36  
37  
38  
39  
40  
41  
42  
43  
44  
45  
46  
47  
48  
49  
50  
51  
52  
53  
54  
55  
56  
57  
58  
59  
60STROBE Statement—Checklist of items that should be included in reports of *cross-sectional studies*

|                              | Item No | Recommendation                                                                                                                                                                                    | Page Number        |
|------------------------------|---------|---------------------------------------------------------------------------------------------------------------------------------------------------------------------------------------------------|--------------------|
| <b>Title and abstract</b>    | 1       | (a) Indicate the study's design with a commonly used term in the title or the abstract                                                                                                            | 1                  |
|                              |         | (b) Provide in the abstract an informative and balanced summary of what was done and what was found                                                                                               | 2-3                |
| <b>Introduction</b>          |         |                                                                                                                                                                                                   |                    |
| Background/rationale         | 2       | Explain the scientific background and rationale for the investigation being reported                                                                                                              | 4                  |
| Objectives                   | 3       | State specific objectives, including any pre-specified hypotheses                                                                                                                                 | 5                  |
| <b>Methods</b>               |         |                                                                                                                                                                                                   |                    |
| Study design                 | 4       | Present key elements of study design early in the paper                                                                                                                                           | 5                  |
| Setting                      | 5       | Describe the setting, locations, and relevant dates, including periods of recruitment, exposure, follow-up, and data collection                                                                   | 5                  |
| Participants                 | 6       | (a) Give the eligibility criteria, and the sources and methods of selection of participants                                                                                                       | 5-6                |
| Variables                    | 7       | Clearly define all outcomes, exposures, predictors, potential confounders, and effect modifiers. Give diagnostic criteria, if applicable                                                          | 5-6                |
| Data sources/<br>measurement | 8*      | For each variable of interest, give sources of data and details of methods of assessment (measurement). Describe comparability of assessment methods if there is more than one group              | 7-8                |
| Bias                         | 9       | Describe any efforts to address potential sources of bias                                                                                                                                         | 25                 |
| Study size                   | 10      | Explain how the study size was arrived at                                                                                                                                                         | 6                  |
| Quantitative variables       | 11      | Explain how quantitative variables were handled in the analyses. If applicable, describe which groupings were chosen and why                                                                      | 11-13              |
| Statistical methods          | 12      | (a) Describe all statistical methods, including those used to control for confounding                                                                                                             | 11-13              |
|                              |         | (b) Describe any methods used to examine subgroups and interactions                                                                                                                               | Table 1, 2 & 3     |
|                              |         | (c) Explain how missing data were addressed                                                                                                                                                       | 12<br>reference 24 |
|                              |         | (d) If applicable, describe analytical methods taking account of sampling strategy                                                                                                                | 11-13              |
|                              |         | (e) Describe any sensitivity analyses                                                                                                                                                             | NA                 |
| <b>Results</b>               |         |                                                                                                                                                                                                   |                    |
| Participants                 | 13*     | (a) Report numbers of individuals at each stage of study—eg numbers potentially eligible, examined for eligibility, confirmed eligible, included in the study, completing follow-up, and analysed | 14                 |
|                              |         | (b) Give reasons for non-participation at each stage                                                                                                                                              | Figure 1           |
|                              |         | (c) Consider use of a flow diagram                                                                                                                                                                | Figure 1           |
| Descriptive data             | 14*     | (a) Give characteristics of study participants (eg demographic, clinical, social) and information on exposures and potential confounders                                                          | 14-15<br>Table 1   |
|                              |         | (b) Indicate number of participants with missing data for each variable of interest                                                                                                               | Figure 1           |



|                          |     |                                                                                                                                                                                                              |                                    |
|--------------------------|-----|--------------------------------------------------------------------------------------------------------------------------------------------------------------------------------------------------------------|------------------------------------|
| Outcome data             | 15* | Report numbers of outcome events or summary measures                                                                                                                                                         |                                    |
| Main results             | 16  | (a) Give unadjusted estimates and, if applicable, confounder-adjusted estimates and their precision (eg, 95% confidence interval). Make clear which confounders were adjusted for and why they were included | Table 3<br>(adjusted odds ratio)   |
|                          |     | (b) Report category boundaries when continuous variables were categorized                                                                                                                                    | Table 3                            |
|                          |     | (c) If relevant, consider translating estimates of relative risk into absolute risk for a meaningful time period                                                                                             | NA<br>(calculated only odds ratio) |
| Other analyses           | 17  | Report other analyses done—eg analyses of subgroups and interactions, and sensitivity analyses                                                                                                               | Table 3                            |
| <b>Discussion</b>        |     |                                                                                                                                                                                                              |                                    |
| Key results              | 18  | Summarise key results with reference to study objectives                                                                                                                                                     | 21-23                              |
| Limitations              | 19  | Discuss limitations of the study, taking into account sources of potential bias or imprecision. Discuss both direction and magnitude of any potential bias                                                   | 25-26                              |
| Interpretation           | 20  | Give a cautious overall interpretation of results considering objectives, limitations, multiplicity of analyses, results from similar studies, and other relevant evidence                                   | 21-23                              |
| Generalisability         | 21  | Discuss the generalisability (external validity) of the study results                                                                                                                                        | 21                                 |
| <b>Other information</b> |     |                                                                                                                                                                                                              |                                    |
| Funding                  | 22  | Give the source of funding and the role of the funders for the present study and, if applicable, for the original study on which the present article is based                                                | 27                                 |

\*Give information separately for exposed and unexposed groups.

**Note:** An Explanation and Elaboration article discusses each checklist item and gives methodological background and published examples of transparent reporting. The STROBE checklist is best used in conjunction with this article (freely available on the Web sites of PLoS Medicine at <http://www.plosmedicine.org/>, Annals of Internal Medicine at <http://www.annals.org/>, and Epidemiology at <http://www.epidem.com/>). Information on the STROBE Initiative is available at [www.strobe-statement.org](http://www.strobe-statement.org).

# BMJ Open

## Chest Radiograph Findings in children aged 2-59 months hospitalized with Community-Acquired Pneumonia, prior to the introduction of Pneumococcal Conjugate Vaccine in India- A Prospective Multisite Observational Study

|                                 |                                                                                                                                                                                                                                                                                                                                                                                                                                                                                                                                                                                                                                                                                                                                                                                                                                         |
|---------------------------------|-----------------------------------------------------------------------------------------------------------------------------------------------------------------------------------------------------------------------------------------------------------------------------------------------------------------------------------------------------------------------------------------------------------------------------------------------------------------------------------------------------------------------------------------------------------------------------------------------------------------------------------------------------------------------------------------------------------------------------------------------------------------------------------------------------------------------------------------|
| Journal:                        | <i>BMJ Open</i>                                                                                                                                                                                                                                                                                                                                                                                                                                                                                                                                                                                                                                                                                                                                                                                                                         |
| Manuscript ID                   | bmjopen-2019-034066.R2                                                                                                                                                                                                                                                                                                                                                                                                                                                                                                                                                                                                                                                                                                                                                                                                                  |
| Article Type:                   | Original research                                                                                                                                                                                                                                                                                                                                                                                                                                                                                                                                                                                                                                                                                                                                                                                                                       |
| Date Submitted by the Author:   | 19-Mar-2020                                                                                                                                                                                                                                                                                                                                                                                                                                                                                                                                                                                                                                                                                                                                                                                                                             |
| Complete List of Authors:       | Awasthi, Shally; King George's Medical University, Pediatrics<br>Rastogi, Tuhina; King George's Medical University, Paediatrics<br>Mishra, Neha; King George's Medical University, Pediatrics<br>Chauhan, Abhishek ; Dr Ram Manohar Lohia Institute of Medical Sciences, Department of Radio-diagnosis<br>Mohindra, Namita; Sanjay Gandhi Post Graduate Institute of Medical Sciences, Department of Radio-diagnosis<br>Shukla, Ram ; Banaras Hindu University, Varanasi, India, Institute of Medical Sciences<br>Agrawal, Monika; King George's Medical University, Social and Preventive Medicine<br>Pandey, CM; Sanjay Gandhi Post Graduate Institute of Medical Sciences, Biostatistics & Health Informatics<br>Kohli, Neera ; King George's Medical University, Department of Radio-diagnosis<br>Study Group, CAP; CAP study Group |
| <b>Primary Subject Heading</b>: | Paediatrics                                                                                                                                                                                                                                                                                                                                                                                                                                                                                                                                                                                                                                                                                                                                                                                                                             |
| Secondary Subject Heading:      | Global health                                                                                                                                                                                                                                                                                                                                                                                                                                                                                                                                                                                                                                                                                                                                                                                                                           |
| Keywords:                       | Chest radiographs, Hospitalized community-acquired pneumonia, under-five, Streptococcus pneumoniae, India                                                                                                                                                                                                                                                                                                                                                                                                                                                                                                                                                                                                                                                                                                                               |
|                                 |                                                                                                                                                                                                                                                                                                                                                                                                                                                                                                                                                                                                                                                                                                                                                                                                                                         |

SCHOLARONE™  
Manuscripts



I, the Submitting Author has the right to grant and does grant on behalf of all authors of the Work (as defined in the below author licence), an exclusive licence and/or a non-exclusive licence for contributions from authors who are: i) UK Crown employees; ii) where BMJ has agreed a CC-BY licence shall apply, and/or iii) in accordance with the terms applicable for US Federal Government officers or employees acting as part of their official duties; on a worldwide, perpetual, irrevocable, royalty-free basis to BMJ Publishing Group Ltd ("BMJ") its licensees and where the relevant Journal is co-owned by BMJ to the co-owners of the Journal, to publish the Work in this journal and any other BMJ products and to exploit all rights, as set out in our [licence](#).

The Submitting Author accepts and understands that any supply made under these terms is made by BMJ to the Submitting Author unless you are acting as an employee on behalf of your employer or a postgraduate student of an affiliated institution which is paying any applicable article publishing charge ("APC") for Open Access articles. Where the Submitting Author wishes to make the Work available on an Open Access basis (and intends to pay the relevant APC), the terms of reuse of such Open Access shall be governed by a Creative Commons licence – details of these licences and which [Creative Commons](#) licence will apply to this Work are set out in our licence referred to above.

Other than as permitted in any relevant BMJ Author's Self Archiving Policies, I confirm this Work has not been accepted for publication elsewhere, is not being considered for publication elsewhere and does not duplicate material already published. I confirm all authors consent to publication of this Work and authorise the granting of this licence.

1  
2  
3  
4 Title: ***Chest Radiograph Findings in children aged 2-59***  
5 ***months hospitalized with Community-Acquired Pneumonia,***  
6 ***prior to the introduction of Pneumococcal Conjugate Vaccine***  
7 ***in India- A Prospective Multisite Observational Study***  
8  
9  
10  
11

12  
13 Short Title: ***Radiological Findings in Children hospitalized***  
14 ***with Community-Acquired Pneumonia in India Pre-***  
15 ***Pneumococcal Conjugate Vaccine introduction***  
16  
17  
18  
19  
20

21 **Shally Awasthi<sup>1\*</sup>, Tuhina Rastogi<sup>1</sup>, Neha Mishra<sup>1</sup>, Abhishek**  
22 **Chauhan<sup>2</sup>, Namita Mohindra<sup>3</sup>, Ram Chandra Shukla<sup>4</sup>, Monika**  
23 **Agarwal<sup>5</sup>, Chandra Mani Pandey<sup>6</sup>, Neera Kohli<sup>7</sup> and CAP Group<sup>^</sup>**  
24  
25  
26  
27

28 <sup>1</sup>Department of Pediatrics, King George's Medical University, Lucknow, India

29 <sup>2</sup>Department of Radio-diagnosis, Dr Ram Manohar Lohia Institute of Medical Sciences,  
30 Lucknow, India

31 <sup>3</sup>Department of Radio-diagnosis, Sanjay Gandhi Post Graduate Institute of Medical Sciences,  
32 Lucknow, India

33 <sup>4</sup>Department of Radio-diagnosis, Institute of Medical Sciences, Banaras Hindu University,  
34 Varanasi, India

35 <sup>5</sup> Department of Community Medicine, King George's Medical University, Lucknow, India

36 <sup>6</sup>Department of Biostatistics and Health Informatics, Sanjay Gandhi Postgraduate  
37 Institute of Medical Sciences, Lucknow, India

38 <sup>7</sup>Department of Radio-diagnosis, King George's Medical University, Lucknow, India  
39  
40  
41  
42

43  
44 <sup>^</sup>Members of the Lucknow CAP Group are given in the Acknowledgement  
45  
46

47 \*Corresponding Author

48 Postal Address: Prof. Shally Awasthi, Head, Department of Paediatrics, King George's Medical  
49 University, Lucknow , India Pincode: 226003

50 Mobile: +91-9839221244

51 E-mail: shally07@gmail.com  
52  
53

54 Word Count: 4643    Tables: 3    Figure:1  
55  
56  
57  
58  
59  
60

## ABSTRACT

**Objectives:** To assess radiological abnormalities in chest X-rays and to identify the demographic and clinical correlates of specific radiological abnormalities in children aged 2-59 months, hospitalized with World Health Organization defined community-acquired pneumonia, residing in pre-specified districts of Uttar Pradesh and Bihar, India.

**Design:** Prospective, hospital-based surveillance

**Setting:** Multi-site study conducted in a network of 117 secondary/tertiary care hospitals in four districts of Uttar Pradesh and Bihar, India.

**Participants:** Included were children aged 2-59 months hospitalized with community-acquired pneumonia, residing in project district, with duration of illness of <14 days and who were not hospitalized elsewhere for this episode nor had been recruited previously.

**Main outcome measure:** Radiological abnormalities in the chest X-rays, where there was concordance between two or more of the panel of three trained radiologists.

**Results:** From January 2015 to April 2017, 3214 cases were recruited and in 99.40 % (3195/3214) chest X-rays were available. Among 88.54 % (2829/3195) interpretable X-rays, 34.53 % (977/ 2829, 95% C.I. 32.78 -36.28) had some radiological abnormalities, while the rest were normal. Primary endpoint pneumonia alone or with other infiltrates was found in 22.44 % (635/2829, C.I. 20.90 %-23.98 %), other infiltrates only in 12.09% (342/ 2829; C.I. 10.88 %-13.29 %). There was a statistically significant inter-district variation in radiological abnormality. Statistically significantly higher proportion of abnormal chest X-ray was found among girls, those with weight-for-age z score  $\leq -3$  SD, longer duration of fever, pallor and with exposure to biomass fuel.

1  
2  
3 **Conclusions:** Among hospitalized cases of community-acquired pneumonia, almost one-third  
4 children had abnormal chest radiographs, which were higher in females, malnourished children  
5 and those with longer illnesses; and an intra-district variation was observed.  
6  
7  
8  
9

10  
11  
12 **Key words:** Chest radiographs, Hospitalized community-acquired pneumonia, under-five,  
13 *Streptococcus pneumoniae*, India  
14  
15  
16

### 17 **Strengths and Limitations of the Study**

- 18 • Prospective, multisite recruitments from a large hospital surveillance network established for  
19 the project in four districts in two states of India that have high under-five mortality rates  
20
- 21 • Standard World Health Organization definition was used for identifying hospitalized cases of  
22 clinical pneumonia  
23
- 24 • Radiological abnormalities interpreted by a panel of three trained radiologists at locations out  
25 of the surveillance network, blinded to each other as well as clinical features of the case  
26
- 27 • Since pre-existing X-rays machines were used, there was a variation in the quality of images  
28 obtained, which were minimized by digitizing them centrally  
29
- 30 • Since data of clinical examination was abstracted from hospital records, it could have resulted  
31 in inter-observer variation.  
32  
33  
34  
35  
36  
37  
38  
39  
40  
41  
42  
43  
44  
45  
46  
47  
48  
49  
50  
51  
52  
53  
54  
55  
56  
57  
58  
59  
60

# 1 INTRODUCTION

2 Community-acquired pneumonia (CAP) is the single largest infectious cause of death in young  
3 children worldwide. Globally, pneumonia accounts for 16% of deaths in children under-five years of  
4 age and results in almost one million deaths (0.9 million children in 2016) every year<sup>1 2</sup>. Most  
5 deaths due to pneumonia occur in low and middle income countries particularly in sub-Saharan  
6 Africa and South Asia<sup>2 3</sup>. In India, there were approximately 0.44 million under-five deaths due to  
7 CAP in the year 2015<sup>4</sup>.

8  
9 CAP could have viral or bacterial etiology<sup>5 - 7</sup>. Etiology varies from country to country and also  
10 across different time periods. Pediatric bacterial pneumonia is predominantly caused by  
11 *Streptococcus pneumoniae* and *Hemophilus influenzae Type B* while Respiratory syncytial virus  
12 and Influenza A or B virus are important contributors of pediatric viral pneumonia<sup>5 6</sup>. The World  
13 Health Organization (WHO) recommends the introduction of Pneumococcal Conjugate Vaccine  
14 (PCV) in the national immunization programme of countries with high child mortality rates,  
15 which includes India<sup>8</sup>. Consequently, PCV-13 was launched in May 2017 under the national  
16 immunization programme of five Indian states (Uttar Pradesh, Bihar, Rajasthan, Madhya Pradesh  
17 and Himachal Pradesh) in a phased manner<sup>9</sup>. It is expected to be rolled out in other parts of the  
18 country in the near future. Vaccination against *Hemophilus influenzae Type B* is already under  
19 the national immunization programme since 2011.

20  
21 Differentiating bacterial from viral etiology of CAP on clinical features or by investigations  
22 remains difficult<sup>7 10 11</sup>. Several PCV probe trials have used radiographically confirmed end-  
23 point pneumonia, to be an outcome for vaccine efficacy and this has been endorsed by WHO<sup>12-14</sup>.

1  
2  
3 24  
4  
5  
6 25 The current study was a hospital-based surveillance to assess the radiological abnormalities in  
7  
8 26 chest X-rays (CXRs) and to identify the demographic and clinical correlates of specific  
9  
10 27 radiological abnormalities in children aged 2-59 months, hospitalized with WHO defined CAP,  
11  
12 28 residing in pre-specified districts of Uttar Pradesh and Bihar, India.  
13  
14  
15 29

## 30 **METHODS**

### 31 **Study design and Setting**

32 This prospective multi-site observational study was conducted in Lucknow and Etawah districts  
33 of Uttar Pradesh and Patna & Darbhanga districts of Bihar, India. Uttar Pradesh is the first most  
34 populated and Bihar third most populated state of India<sup>15 16</sup>. In Lucknow district 66.2% population  
35 resides in urban areas and in Patna district 43.07%<sup>15 16</sup>. In contrast, only 22.3% population of  
36 Etawah district and 9.74% population of Darbhanga district resides in urban areas<sup>15 16</sup>. All four  
37 project districts have alarmingly high infant and child mortality indicators<sup>15-17</sup>. The under-five  
38 mortality rates of Lucknow (58/1000), Etawah (85/1000), Patna (46/1000) and Darbhanga  
39 (77/1000) districts are above the national average (50/1000)<sup>15-17</sup>. Similarly, the infant mortality  
40 rates of Lucknow (44/1000), Etawah (56/1000), Patna (31/1000) and Darbhanga (44/1000)  
41 districts are also higher than the national average (41/1000)<sup>15-17</sup>.

### 43 **Study Population**

44 A prospective, active, hospital-based surveillance system was established for this study<sup>17 18</sup>.  
45 Included in the surveillance were 117 public and private hospitals of four study districts which



1  
2  
3 46 provided either secondary or tertiary level care to admitted children. Surveillance officers visited  
4  
5 47 the hospital every 48-72 hours to screen and recruit eligible cases. In between the visits they  
6  
7 48 telephonically contacted the hospitals and made additional visits, if required. All children (2-59  
8  
9 49 months), hospitalized in network hospitals between January 2015 to April 2017, with history of  
10  
11 50 fast breathing with/without chest in-drawing were screened <sup>18</sup>.

12  
13  
14  
15 51  
16  
17 52 Included were children hospitalized with symptoms of WHO defined CAP and residing in the  
18  
19 53 project district <sup>18</sup>. WHO has developed guidelines for hospital-based management of common  
20  
21 54 childhood illness such as pneumonia <sup>19</sup>. According to these guidelines, fast breathing  $\geq 50$   
22  
23 55 breaths/minute in a child aged 2–11 months and  $\geq 40$  breaths/minute in a child aged 12-59  
24  
25 56 months along with chest indrawing was categorized as having `pneumonia`<sup>19</sup>. A child presenting  
26  
27 57 with cough or difficulty in breathing plus atleast one of the following: (a) oxygen saturation  $<$   
28  
29 58 90% or central cyanosis or (b) severe respiratory distress (e.g. grunting, very severe chest  
30  
31 59 indrawing) or (c) signs of pneumonia with a general danger sign (inability to breastfeed or drink,  
32  
33 60 lethargy or reduced level of consciousness, convulsions) was categorized as having `severe  
34  
35 61 pneumonia`<sup>19</sup>. Excluded were children with cough for  $\geq 14$  days or those that had been  
36  
37 62 hospitalized in last 14 days <sup>18</sup>.

## 63 64 **Sample Size**

65 We assumed that the incidence of radiological pneumonia is 3/100 child years of observations.  
66 Then for a margin of error of 1.5/100 child years of observation, incidence of pneumonia in the  
67 community of 20/100 child years of observation, alpha level of 0.05, and power of 90% when the

1  
2  
3 68 estimated population of children under-five years of age in Lucknow district <sup>20</sup> is 750,000; 693  
4  
5 69 cases had to be included per district.  
6  
7

8 70  
9

## 10 71 **Data collection**

11  
12  
13 72 Data was collected by surveillance officers who had postgraduate degree in social sciences and  
14  
15 73 atleast 10 years experience in community based health research. After recruitment, they were  
16  
17 74 imparted six-day centralized training on project procedures and logistics. Class-room as well as  
18  
19 75 practical skills-training was given by the coordinating centre in Lucknow. Pre and post tests were  
20  
21 76 conducted to ascertain knowledge and skills acquired by them through the training to ensure  
22  
23 77 quality in data collection. The coordinating centre provided annual refresher trainings to the  
24  
25 78 surveillance officers from all four sites in Lucknow.  
26  
27  
28

29  
30 79  
31  
32

33 80 After obtaining written, informed consent of the caregivers, data was collected through face-to-  
34  
35 81 face interviews with them as well as by abstraction from hospital records. Socio-demographic  
36  
37 82 data, obtained by interviewing caregivers, was: child's age, gender, residence, birth order,  
38  
39 83 immunization status, current breastfeeding status, parental education and occupation, smoking  
40  
41 84 status of parents, family type, housing infrastructure, use of biomass fuel etc. Caregivers were  
42  
43 85 also asked about the symptoms of disease and its duration in days.  
44  
45  
46

47 86  
48

49 87 Clinical data, recorded by pre-existing hospital staff at the time of hospitalization, was  
50  
51 88 abstracted. Data was collected on anthropometry (weight and height), fever (axillary temperature  
52  
53 89  $\geq 37.5^{\circ}\text{C}$ ), oxygen saturation by pulse oxymetry, pallor, central cyanosis, signs of pneumonia  
54  
55 90 with a general danger sign and vital signs (heart rate and respiratory rate). Presence of wheezing  
56  
57  
58

59 7  
60

1  
2  
3 91 on auscultation of chest was abstracted or inquired from the treating physician. At the hospitals,  
4  
5 92 clinicians generally used Integrated Management of Childhood Illness (IMCI) definitions<sup>21</sup> to  
6  
7 93 identify pallor, cyanosis, wheeze on auscultation and general danger sign as it is incorporated in  
8  
9 94 their medical undergraduate training. Most doctors of public health sector also receive a formal  
10  
11 95 in-service training on IMCI <sup>21</sup>. Clinical outcome (survival or mortality) was noted from hospital  
12  
13 96 records on follow up.<sup>17 18</sup>  
14  
15  
16  
17  
18

### 19 98 **Chest x-ray (CXR) image acquisition and archiving**

20  
21  
22 99 CXR (poster-anterior view) was done when advised by the treating physician. These CXRs were  
23  
24 100 obtained by the surveillance staff at the time of recruitment. CXRs were either analog or digital.  
25  
26 101 In case of digital CXRs, second copy was obtained where possible. If only single analog image  
27  
28 102 was available, then the hardcopy of CXR was obtained from the caregiver after the child was  
29  
30 103 discharged. If the caregiver was not ready to give the hardcopy of CXR (in <1% cases), image of  
31  
32 104 the same was captured by surveillance officers using 16 megapixel cell phone camera and  
33  
34 105 portable CXR view-box.  
35  
36  
37  
38 106  
39  
40 107 CXRs of recruited cases were subsequently scanned and converted into digital format using a  
41  
42 108 diagnostic-quality film image digitalizer (Microteck International Limited, model Medi 6000  
43  
44 109 plus) <sup>22</sup>. CXRs obtained/converted into digital image were stored as per the standard operating  
45  
46 110 procedure and were subsequently archived for web-based radiological interpretation. Digital  
47  
48 111 images were stored in JPEG format at 300 dpi resolution. Each CXR file was anonymized and  
49  
50 112 given a unique identification number. Digital CXRs were uploaded on online data management  
51  
52 113 software, developed especially for the project.  
53  
54  
55  
56  
57  
58  
59  
60

114

## 115 **Interpretation of radiological images**

116 A panel of radiologists was constituted for standardized interpretations of CXRs. Four  
117 radiologists were part of this panel, one of whom was Project co-investigator-Radiology (NK).

118 All radiologists are faculty in medical teaching institutes and also look after pediatric radiology.

119 They all have more than fifteen years experience in interpreting pediatric CXRs.

120

121 Radiologists were trained according to the methodology developed by Department of  
122 Immunization, Vaccines, and Biologicals of the WHO for research purpose <sup>11</sup>. An international  
123 WHO-certified trainer from the International Centre for Diarrhoeal Disease Research,  
124 Bangladesh imparted a two-day in-house training to the radiologists. Training objective was to  
125 standardize interpretation and coding of CXRs, to develop a CXR reporting form [S1 Appendix]  
126 and to provide training on web-based CXR retrieval and reporting system. During the training,  
127 210 CXRs of WHO data set were used. For assessing concordance post training, another set of  
128 48 CXRs was provided for interpretation to individual radiologists. Post-test agreement with  
129 WHO findings was calculated, which was about 80%. Inter-observer variation was about 25%  
130 and was for minor interpretation like quality of film, end point infiltrates etc. Repeat training  
131 was conducted on an additional set of 44 CXRs provided by WHO to ensure standardization in  
132 interpretation. Thereafter, concordance achieved by the radiologists was reviewed quarterly by  
133 the study arbitrator. Radiologists met annually to review key concepts and discuss challenges  
134 faced in interpreting CXRs.

135

1  
2  
3 136 After training, radiologists independently reviewed CXRs and registered their findings in an  
4  
5 137 online standardized chest radiograph interpretation form [S1 Appendix]. For optimal viewing of  
6  
7  
8 138 CXRs, all radiologists used similar workstations. Specifications were provided for the computer  
9  
10 139 monitor and hardware to be used. It was ensured that monitors had the correct brightness and  
11  
12 140 contrast adjustment for optimal viewing.  
13

14  
15 141  
16  
17 142 During online evaluation, radiologists reported the quality of film as *'interpretable'* or *'un-*  
18  
19 143 *interpretable'*. Radiologists categorized *'interpretable'* CXRs as either *'adequate/optimal'* for  
20  
21 144 features that allowed confident interpretation of consolidation and pleural effusion as well as  
22  
23 145 other infiltrates or *'suboptimal'* for features that allowed interpretation of consolidation and  
24  
25 146 pleural effusion, but not of other infiltrates or findings. In *'un-interpretable'* CXRs, no comment  
26  
27 147 was possible for radiological abnormality with respect to presence or absence of consolidation or  
28  
29 148 pleural effusion or other infiltrates<sup>12</sup>.  
30  
31  
32

33 149  
34  
35 150 After interpreting film quality, radiologists evaluated interpretable CXRs for abnormal  
36  
37 151 radiological findings. For each CXR evaluated, radiological abnormality could be presence of  
38  
39 152 consolidation, other infiltrates or pleural effusion. *'Consolidation'* was defined as a dense or  
40  
41 153 confluent opacity that occupies a portion or whole of a lobe or the entire lung, that may or may  
42  
43 154 not contain air bronchograms. *'Other infiltrates'* were defined as linear and patchy opacities  
44  
45 155 (interstitial infiltrate) in a lacy pattern, featuring peri-bronchial thickening and multiple areas of  
46  
47 156 atelectasis; also including minor patchy infiltrates that are not of sufficient magnitude to  
48  
49 157 constitute endpoint consolidation, and small areas of atelectasis that in children may be difficult  
50  
51 158 to distinguish from consolidation. *'Pleural effusion'* was defined as the fluid in the lateral  
52  
53  
54  
55  
56  
57  
58  
59  
60

1  
2  
3 159 pleural space between the lung and chest wall that is spatially associated with a pulmonary  
4  
5 160 parenchymal infiltrate (including `other infiltrates`) or has obliterated enough of the hemithorax  
6  
7  
8 161 to obscure any infiltrates. In most cases, this will be seen at the costo-phrenic angle or as a layer  
9  
10 162 of fluid adjacent to the lateral chest-wall and this does not include fluid seen in the horizontal or  
11  
12 163 oblique fissures<sup>12</sup>. Primary end point pneumonia (PEP) for research purpose was the presence  
13  
14  
15 164 of consolidation or pleural effusion which could be with or without other infiltrates.  
16  
17 165

18  
19 166 Final conclusions were categorised as: (a) “*Abnormal*” when it was `PEP only` or `Other  
20  
21 167 *infiltrates only*` or `Both PEP and other infiltrates` and (b) `Normal` when no findings were  
22  
23  
24 168 abnormal<sup>12</sup>.  
25

26 169  
27  
28 170 After radiological interpretation, online data was archived, stored and checked for  
29  
30 171 inconsistencies and completeness by the data manager. CXRs with concordant and discordant  
31  
32 172 interpretations were identified. Interpretations were considered concordant when there was an  
33  
34 173 agreement between two or more radiologists on final conclusions and discordant if all the three  
35  
36 174 radiologists disagreed. Discordant interpretations were forwarded to the study arbitrator (NK).  
37  
38 175 Arbitrator assessed discordant CXRs online and her interpretation was taken as final.  
39  
40 176

## 41 42 43 44 177 **Data management and statistical analysis**

45  
46 178 Clinical data of hospital surveillance network was entered online in customized software.  
47  
48 179 Primary entry was done by the four participating sites. Secondary data entry was done by the  
49  
50 180 coordinating site in separate customized software. Anonymized CXRs were uploaded on  
51  
52 181 customized software. Each of the three panelists assessed the CXRs online, blind to peer  
53  
54  
55  
56  
57  
58  
59  
60

1  
2  
3 182 assessments as well as clinical features of the case. CXR assessment data was downloaded from  
4  
5 183 the online software in MS Access database.  
6  
7  
8 184

9  
10 185 Exploratory data analysis was performed for detection of outlier and missing observations for all  
11  
12 186 the variables. Descriptive statistics was calculated for continuous variables as mean  $\pm$  standard  
13  
14 187 deviation and categorical variables in percent. Un-interpretable CXRs were not analyzed. Among  
15  
16 188 interpretable CXRs, those radiological abnormalities where there was concordance between the  
17  
18 189 two radiologists, were taken as final. Weight-for-age (WAZ) z-score each child was calculated  
19  
20 190 using WHO Anthro Survey Analyser <sup>23</sup>. Weight of 7.59% (215/2829) children was missing in  
21  
22 191 our data. Missing weight of recruited children was estimated using regression based imputation  
23  
24 192 technique <sup>24</sup>. Kappa statistics was performed for agreement analysis among radiologists for  
25  
26 193 CXRs findings. Statistical analysis was performed using SPSS version 22.0 (Chicago, IL) <sup>25</sup>. A  
27  
28 194 p-value of  $<0.05$  was taken as statistically significant using a two-tailed distribution.  
29  
30  
31  
32  
33

34 195  
35  
36 196 Univariate analysis was performed to evaluate heterogeneity, stratified by four participating sites  
37  
38 197 for socio-demographic variables such as child's age, gender, residence, birth order,  
39  
40 198 immunization status, current breastfeeding status, parental education and occupation, smoking  
41  
42 199 status of parents, family type, housing infrastructure, use of biomass fuel and for clinical  
43  
44 200 variables such as weight, height, duration of fever and oxygen saturation.  
45  
46  
47

48 201  
49  
50 202 We report proportions of radiological abnormalities among hospitalized children for CAP by  
51  
52 203 four districts. Univariate analysis was performed to assess association of socio-demographic  
53  
54 204 variables and clinical signs of CAP with radiological abnormalities. Chi-square test was used for  
55  
56  
57

1  
2  
3 205 categorical variables and student's t-test for continuous variables. ANOVA test was used for  
4  
5 206 more than two groups to test the significance of continuous variables. Multivariate unconditional  
6  
7 207 logistic regression was performed find association of presence of various radiological  
8  
9 208 abnormalities, controlling for district of residence and other variables that had univariate  
10  
11 209 association with radiological abnormalities (p value  $\leq 0.2$ ) and/or were clinically meaningful.  
12  
13  
14  
15 210

16  
17 211 We developed four models and in these four models dependent (outcome) were:

18  
19 212 Model I: Abnormal vs. Normal

20  
21 213 Model II: Primary End Point Pneumonia alone or with other infiltrates vs. Normal

22  
23 214 Model III: Primary End Point Pneumonia alone vs. Normal

24  
25 215 Model IV: Other infiltrates only vs. Normal

26  
27 216  
28  
29  
30  
31 217 Independent variables that were kept across all the four models were : participating districts, age,  
32  
33 218 gender, use of biomass fuel, symptoms of CAP such as duration of illness, presence of wheeze  
34  
35 219 on auscultation, pallor, vomiting everything and malnutrition status of the case [ $WAZ \leq -2$  SD  
36  
37 220 (malnourished) and  $WAZ \leq -3$  SD (severely malnourished)].  
38  
39

40 221

## 41 42 43 222 **Patient and public involvement in research**

44  
45 223 Patients or public were not involved in the development of research question, study design or  
46  
47 224 conducting the research. Reporting of this research conforms to the guidelines for Strengthening  
48  
49 225 the Reporting of Observational Studies in Epidemiology (STROBE)<sup>26</sup>.  
50  
51

52 226

## 53 54 55 227 **RESULTS**



1  
2  
3 228 A total of 3290 hospitalized cases were screened in hospital surveillance network of Lucknow  
4  
5 229 and Etawah districts of Uttar Pradesh and Patna & Darbhanga districts of Bihar. Out of these,  
6  
7 230 3214 cases fulfilling the WHO diagnosis of CAP were included [Figure 1]. Among them, 3195  
8  
9 231 (99.40%) cases were enrolled with CXRs and only in 19 (1.0%) cases CXRs were not done. Out  
10  
11 232 of these 88.54% (2829/3195) CXRs were found interpretable and remaining 11.45% (366/3195)  
12  
13 233 were found un-interpretable by radiologists. Among interpretable CXRs, 99.11 % (2804/2829)  
14  
15 234 children had 'severe pneumonia' as per the WHO criteria <sup>19</sup>.  
16  
17  
18  
19  
20  
21

22 236 Among interpretable CXRs, we found 22.44% (635/2829) children had PEP alone or with  
23  
24 237 infiltrates, 12.09% (342/2829) had other infiltrates only and 65.46% (1852/2829) had normal  
25  
26 238 CXRs findings [Figure 1]. Concordance among  $\geq 2$  radiologists on final conclusion of CXRs  
27  
28 239 findings was 86.0%. Kappa statistics was calculated for agreement of CXRs findings between  
29  
30  
31 240 Reader 1 versus Reader 2 ( $K_1=0.31$ ), Reader 2 versus Reader 3 ( $K_2=0.46$ ) and Reader 3 versus  
32  
33 241 Reader 1 ( $K_3=0.42$ ).  
34  
35  
36  
37

38 243 **Table 1** shows univariate distribution of socio-demographic and clinical variables among  
39  
40 244 hospitalized cases across four participating districts. A statistically significant variation was  
41  
42 245 observed in all socio-demographic variables such as place of residence, type of house, type of  
43  
44 246 family, maternal and paternal education and occupation, use of biomass fuel and parental  
45  
46 247 smoking status across the four districts. We also report other clinical variables of recruited cases  
47  
48 248 across the four districts in **table 1**. Oxygen saturation by pulse-oxymetry was statistically  
49  
50 249 significantly different across the sites, the proportion of cases with oxygen saturation  $< 90$  % was  
51  
52  
53 250 found also found statistically significant in children across four districts ( $p < 0.0001$ ).  
54  
55  
56  
57  
58  
59  
60

251

252 **Table 1: Distribution of socio-demographic and clinical variables among hospitalized children for**  
 253 **participating districts (Jan 2015-April 2017)**

| Characteristics                          | Lucknow           | Etawah           | Patna            | Darbhanga        | Total             |
|------------------------------------------|-------------------|------------------|------------------|------------------|-------------------|
| <b>Socio-demographic Characteristics</b> | <b>n=1025 (%)</b> | <b>n=389 (%)</b> | <b>n=744 (%)</b> | <b>n=671 (%)</b> | <b>N=2829 (%)</b> |
| <b>Gender</b>                            |                   |                  |                  |                  |                   |
| Male                                     | 659(64.29)        | 287(73.78)       | 557(74.87)       | 502(74.81)       | 2005(70.87)       |
| <b>Place of residence</b>                |                   |                  |                  |                  |                   |
| Rural                                    | 195(19.02)        | 279(71.72)       | 304(40.86)       | 614(91.51)       | 1392(49.20)       |
| Urban                                    | 830(80.98)        | 110(28.28)       | 440(59.14)       | 57(8.49)         | 1437(50.80)       |
| <b>Family Type</b>                       |                   |                  |                  |                  |                   |
| Joint                                    | 688(67.12)        | 360(92.54)       | 707(95.03)       | 383(57.08)       | 2138(75.57)       |
| Nuclear                                  | 337(32.88)        | 29(7.46)         | 37(4.97)         | 287(42.77)       | 690(24.39)        |
| <b>House type</b>                        |                   |                  |                  |                  |                   |
| Mud                                      | 64(6.24)          | 54(13.88)        | 123(16.53)       | 374(55.74)       | 615(21.74)        |
| Bricks                                   | 854(83.32)        | 256(65.81)       | 453(60.89)       | 85(12.67)        | 1648(58.25)       |
| Combined                                 | 107(10.4)         | 79(20.31)        | 168(22.58)       | 212(31.59)       | 566(20.01)        |
| <b>Mother's Education</b>                |                   |                  |                  |                  |                   |
| No formal education                      | 203(19.80)        | 56(14.40)        | 328(44.09)       | 496(73.92)       | 1083(38.28)       |
| Class I-V                                | 108(10.54)        | 28(7.20)         | 82(11.02)        | 38(5.66)         | 256(9.05)         |
| Class VI-XII                             | 379(36.98)        | 176(45.24)       | 243(33.66)       | 112(16.69)       | 910(32.17)        |
| Graduate/ Post graduation                | 335(32.68)        | 129(33.16)       | 91(12.23)        | 25(3.73)         | 580(20.50)        |
| <b>Father's Education</b>                |                   |                  |                  |                  |                   |
| No formal education                      | 167(16.29)        | 29(7.46)         | 153(20.56)       | 345(51.42)       | 694(24.53)        |
| Class I-V                                | 85(8.29)          | 19(4.88)         | 91(12.23)        | 82(12.22)        | 277(9.79)         |
| Class VI-XII                             | 437(42.63)        | 206(52.96)       | 328(44.09)       | 205(30.55)       | 1176(41.57)       |
| Graduate/ Post graduation                | 336(32.78)        | 135(34.70)       | 172(23.12)       | 39(5.81)         | 682(24.11)        |
| <b>Birth Order</b>                       |                   |                  |                  |                  |                   |
| 1 <sup>st</sup>                          | 435(42.44)        | 187(48.07)       | 315(42.34)       | 192(28.61)       | 1129(39.91)       |
| 2 <sup>nd</sup>                          | 343(33.46)        | 120(30.85)       | 235(31.59)       | 258(38.45)       | 956(33.79)        |
| 3 <sup>rd</sup>                          | 153(14.93)        | 47(12.08)        | 129(17.34)       | 137(20.42)       | 466(16.47)        |
| More than 3 <sup>rd</sup>                | 93(9.07)          | 35(9.00)         | 62(8.33)         | 83(12.37)        | 273(9.65)         |
| <b>Immunization Status</b>               |                   |                  |                  |                  |                   |
| Complete for age                         | 792(77.27)        | 300(77.12)       | 711(95.56)       | 544(81.07)       | 2347(82.96)       |
| Incomplete for age                       | 220(21.46)        | 84(21.59)        | 25(3.36)         | 126(18.78)       | 455(16.08)        |
| Unimmunized                              | 13(1.27)          | 5(1.29)          | 8(1.08)          | 1(0.15)          | 27(0.95)          |
| <b>Currently Breast Feeding</b>          |                   |                  |                  |                  |                   |
| Yes                                      | 653(63.71)        | 256(65.81)       | 589(79.17)       | 537(80.03)       | 2035(71.93)       |
| No                                       | 372(36.29)        | 133(34.19)       | 155(20.83)       | 134(19.97)       | 794(28.07)        |
| <b>Father's Occupation</b>               |                   |                  |                  |                  |                   |
| Unemployed                               | 13(1.27)          | 20(5.14)         | 27(3.63)         | 63(9.39)         | 123(4.35)         |
| Daily wages                              | 329(32.10)        | 81(20.82)        | 165(22.18)       | 474(70.64)       | 1049(37.08)       |
| Salaried/ Professional                   | 397(38.73)        | 104(26.74)       | 245(32.93)       | 55(8.20)         | 801(28.31)        |

|                                                                |                             |                             |                             |                             |                             |
|----------------------------------------------------------------|-----------------------------|-----------------------------|-----------------------------|-----------------------------|-----------------------------|
| Self-Employment                                                | 286(27.90)                  | 184(47.30)                  | 307(41.26)                  | 79(11.77)                   | 856(30.26)                  |
| <b>Mother's Occupation</b>                                     |                             |                             |                             |                             |                             |
| Home maker                                                     | 961(93.76)                  | 376(96.66)                  | 701(94.22)                  | 484(72.13)                  | 2522(89.15)                 |
| Daily wages                                                    | 17(1.66)                    | 3(0.77)                     | 17(2.28)                    | 171(25.48)                  | 208(7.35)                   |
| Salaried/Professionals                                         | 47(4.59)                    | 9(2.31)                     | 18(2.42)                    | 7(1.04)                     | 81(2.86)                    |
| Self-Employment                                                | 0(0.0)                      | 1(0.26)                     | 8(1.08)                     | 9(1.34)                     | 18(0.64)                    |
| <b>Biomass fuel</b>                                            |                             |                             |                             |                             |                             |
| Yes                                                            | 211(20.59)                  | 245(62.98)                  | 263(35.35)                  | 609(90.76)                  | 1328(46.94)                 |
| No                                                             | 814(79.41)                  | 144(37.02)                  | 481(64.65)                  | 62(9.24)                    | 1501(53.06)                 |
| <b>Smoking Status-Father</b>                                   |                             |                             |                             |                             |                             |
| Yes                                                            | 152(14.83)                  | 45(11.57)                   | 56(7.53)                    | 59(8.79)                    | 312(11.03)                  |
| No                                                             | 873(85.17)                  | 344(88.43)                  | 688(92.47)                  | 612(91.21)                  | 2517(88.97)                 |
| <b>Indoor smoking-Father</b>                                   |                             |                             |                             |                             |                             |
| Yes                                                            | 83(8.10)                    | 21(5.40)                    | 16(2.15)                    | 43(6.41)                    | 163(5.76)                   |
| No                                                             | 942(91.90)                  | 368(91.60)                  | 728(97.85)                  | 628(93.59)                  | 2666(94.24)                 |
| <b>Smoking Status-Family member</b>                            |                             |                             |                             |                             |                             |
| Yes                                                            | 129(12.59)                  | 55(14.14)                   | 45(6.05)                    | 102(15.20)                  | 331(11.70)                  |
| No                                                             | 896(87.41)                  | 334(85.86)                  | 699(93.95)                  | 569(84.80)                  | 2498(83.30)                 |
| <b>Indoor smoking – Family member</b>                          |                             |                             |                             |                             |                             |
| Yes                                                            | 84(8.20)                    | 27(6.94)                    | 27(3.63)                    | 94(14.01)                   | 232(8.20)                   |
| No                                                             | 941(91.80)                  | 362(93.06)                  | 717(96.37)                  | 577(85.99)                  | 2597(91.80)                 |
| <b>Clinical Variables at the time of admission at hospital</b> | <b>n</b><br><b>Mean± SD</b> | <b>n</b><br><b>Mean± SD</b> | <b>n</b><br><b>Mean± SD</b> | <b>n</b><br><b>Mean± SD</b> | <b>n</b><br><b>Mean± SD</b> |
| Age (in months)                                                | 1025<br>14.53±13.88         | 389<br>10.69±10.95          | 744<br>10.26±11.35          | 671<br>12.30±13.29          | 2829<br>12.35±12.85         |
| Height (in cm)                                                 | 303<br>68.61±13.78          | 324<br>70.66±13.75          | 34<br>64.38±10.25           | 266<br>70.46±12.14          | 927<br>69.70±13.26          |
| Weight (in kg)                                                 | 1025<br>7.96±2.97           | 389<br>7.34±2.73            | 744<br>7.11±2.78            | 671<br>7.78±2.93            | 2829<br>7.61±2.90           |
| Fever Duration (in days )                                      | 929<br>4.46±2.71            | 321<br>3.59±2.37            | 689<br>4.25±2.52            | 569<br>3.54±2.47            | 2508<br>4.08±2.59           |
| <b>Respiratory Rate</b>                                        |                             |                             |                             |                             |                             |
| Respiratory Rate [2-11 months]                                 | 602<br>53.38±14.05          | 272<br>60.87±9.60           | 540<br>53.82±10.16          | 451<br>60.78±7.26           | 1864<br>56.37±11.49         |
| Respiratory Rate [12-59 months]                                | 423<br>47.75±14.17          | 117<br>53.22±13.17          | 204<br>45.59±10.11          | 220<br>58.03±6.83           | 964<br>50.30±12.76          |
|                                                                | <b>n</b><br><b>(%)</b>      | <b>n</b><br><b>(%)</b>      | <b>n</b><br><b>(%)</b>      | <b>n</b><br><b>(%)</b>      | <b>n</b><br><b>(%)</b>      |
| Oxygen saturation done                                         | 528<br>(51.51)              | 343<br>(88.17)              | 236<br>(34.25)              | 319<br>(56.06)              | 1426<br>(50.40)             |
| Oxygen saturation < 90%                                        | 61<br>(11.53)               | 57<br>(16.61)               | 49<br>(20.76)               | 43<br>(13.47)               | 210<br>(14.72)              |

|                                                      |                |                |                |                |                 |
|------------------------------------------------------|----------------|----------------|----------------|----------------|-----------------|
| Grunting                                             | 461<br>(44.98) | 353<br>(90.75) | 687<br>(92.34) | 649<br>(96.72) | 2150<br>(76.00) |
| Very severe chest in-drawing                         | 953<br>(92.97) | 352<br>(90.49) | 739<br>(99.33) | 651<br>(97.02) | 2695<br>(95.26) |
| <b>Signs of Pneumonia with a general danger sign</b> |                |                |                |                |                 |
| Lethargy or reduced level of consciousness           | 423<br>(41.27) | 259<br>(66.58) | 6<br>(0.81)    | 412<br>(61.40) | 1100<br>(38.88) |
| Inability to breastfeed or drink                     | 291<br>(28.39) | 259<br>(66.58) | 75<br>(10.08)  | 312<br>(46.50) | 937<br>(33.12)  |
| Convulsions                                          | 16<br>(1.56)   | 19<br>(4.58)   | 13<br>(1.75)   | 100<br>(14.90) | 148<br>(5.23)   |
| Central cyanosis                                     | 15<br>(1.46)   | 7<br>(1.80)    | 26<br>(3.49)   | 14<br>(2.09)   | 62<br>(2.19)    |

254

255 **Table 2** shows proportions of radiological pneumonia which includes PEP alone or with other  
 256 infiltrate and other infiltrates among cases hospitalized for CAP in four participating districts.  
 257 We observed statistically significant district-wise heterogeneity in radiological abnormalities.  
 258 We found higher proportion of radiological abnormalities in Patna and Lucknow districts, which  
 259 have a larger urban population, and lower proportion in Etawah and Darbhanga districts, which  
 260 in contrast have a larger rural population. We also observed correspondingly higher proportion of  
 261 PEP alone or with other infiltrates in districts of Lucknow and Patna and lower in districts of  
 262 Etawah and Darbhanga.

263

264 **Table 2** also describes univariate distribution of socio-demographic and clinical factors of CAP  
 265 among hospitalized children (2-59 months). Statistically significantly higher proportion of  
 266 females hospitalized for CAP had radiologically abnormal CXR. Likewise, statistically  
 267 significantly higher proportion of abnormal versus normal CXRs findings were reported in

268 hospitalized cases who had symptoms of fever, pallor, wheezing on auscultation, vomiting  
 269 everything or were malnourished.

270

271 **Table 2: Distribution of socio-demographic and clinical factors by chest radiograph**  
 272 **findings among hospitalized children from January 2015-April 2017**

|                                                               | Interpretable chest X rays |                         |                          | Abnormal chest X rays |                                                           |                                      |            |
|---------------------------------------------------------------|----------------------------|-------------------------|--------------------------|-----------------------|-----------------------------------------------------------|--------------------------------------|------------|
|                                                               | N=2829                     | Normal<br>1852<br>n (%) | Abnormal<br>977<br>n (%) | p value               | PEP* alone or<br>with other<br>infiltrate<br>635<br>n (%) | Other<br>infiltrates<br>342<br>n (%) | p<br>value |
| <b>Participating site</b><br>(row %)                          |                            |                         |                          |                       |                                                           |                                      |            |
| Lucknow                                                       | 1025                       | 636<br>(62.05)          | 389<br>(37.95)           | <0.0001               | 282<br>(72.49)                                            | 107<br>(27.51)                       | <0.0001    |
| Etawah                                                        | 389                        | 275<br>(70.69)          | 114<br>(29.31)           |                       | 73<br>(64.04)                                             | 41<br>(35.96)                        |            |
| Patna                                                         | 744                        | 457<br>(61.42)          | 287<br>(38.58)           |                       | 184<br>(64.11)                                            | 103<br>(35.89)                       |            |
| Darbhanga                                                     | 671                        | 484<br>(72.13)          | 187<br>(27.87)           |                       | 96<br>(51.34)                                             | 91<br>(48.66)                        |            |
| <b>Socio-demographic &amp; clinical factors</b><br>(column %) |                            |                         |                          |                       |                                                           |                                      |            |
| <b>Age-group</b><br>(months)                                  |                            |                         |                          |                       |                                                           |                                      |            |
| 2-11                                                          | 1865                       | 1223<br>(66.04)         | 642<br>(65.71)           | 0.86                  | 409<br>(64.41)                                            | 233<br>(68.13)                       | 0.26       |
| 12-59                                                         | 964                        | 629<br>(33.96)          | 335<br>(34.29)           |                       | 226<br>(35.59)                                            | 109<br>(31.87)                       |            |
| <b>Gender</b>                                                 |                            |                         |                          |                       |                                                           |                                      |            |
| Male                                                          | 2005                       | 1354<br>(73.11)         | 651<br>(66.63)           | <0.0001               | 426<br>(67.09)                                            | 225<br>(65.79)                       | 0.72       |
| Female                                                        | 824                        | 498<br>(26.89)          | 326<br>(33.37)           |                       | 209<br>(32.91)                                            | 117<br>(34.21)                       |            |
| <b>Place of residence</b>                                     |                            |                         |                          |                       |                                                           |                                      |            |
| Rural                                                         | 1392                       | 921<br>(49.73)          | 471<br>(48.21)           | 0.44                  | 299<br>(47.09)                                            | 172<br>(50.29)                       | 0.34       |
| Urban                                                         | 1437                       | 931<br>(50.27)          | 506<br>(51.79)           |                       | 336<br>(52.91)                                            | 170<br>(49.71)                       |            |

1  
2  
3  
4  
5  
6  
7  
8  
9  
10  
11  
12  
13  
14  
15  
16  
17  
18  
19  
20  
21  
22  
23  
24  
25  
26  
27  
28  
29  
30  
31  
32  
33  
34  
35  
36  
37  
38  
39  
40  
41  
42  
43  
44  
45  
46  
47  
48  
49  
50  
51  
52  
53  
54  
55  
56  
57  
58  
59  
60

|                                                            |      |                           |                          |         |                          |                          |        |
|------------------------------------------------------------|------|---------------------------|--------------------------|---------|--------------------------|--------------------------|--------|
| <b>Biomass fuel</b>                                        |      |                           |                          |         |                          |                          |        |
| Yes                                                        | 1501 | 867<br>(46.81)            | 461<br>(47.19)           | 0.44    | 294<br>(42.30)           | 167<br>(48.83)           | 0.24   |
| No                                                         | 1328 | 985<br>(53.19)            | 516<br>(52.81)           |         | 341<br>(53.70)           | 175<br>(51.17)           |        |
| <b>Immunization status</b>                                 |      |                           |                          |         |                          |                          |        |
| Complete for age                                           | 2347 | 1546<br>(83.48)           | 801<br>(81.99)           | 0.32    | 516<br>(81.26)           | 285<br>(83.33)           | 0.54   |
| Incomplete                                                 | 482  | 306<br>(16.52)            | 176<br>(18.01)           |         | 119<br>(18.74)           | 57<br>(16.67)            |        |
| <b>Clinical Features</b>                                   |      |                           |                          |         |                          |                          |        |
| Fever                                                      | 2499 | 1616<br>(87.26)           | 883<br>(90.38)           | 0.014   | 575<br>(90.55)           | 308<br>(90.06)           | 0.82   |
| Pallor                                                     | 764  | 465<br>(25.11)            | 299<br>(30.60)           | 0.002   | 200<br>(31.50)           | 99<br>(28.95)            | 0.41   |
| Wheeze on auscultation                                     | 2054 | 1377<br>(74.35)           | 677<br>(69.29)           | 0.005   | 415<br>(65.35)           | 262<br>(76.61)           | 0.0003 |
| Duration of illness fever [days] (n, Mean $\pm$ SD)        | 2499 | 1611<br>3.91 $\pm$ 2.51   | 888,<br>4.40 $\pm$ 2.70  | <0.0001 | 577,<br>4.57 $\pm$ 2.82  | 342,<br>4.08 $\pm$ 2.44  | 0.011  |
| <b>Respiratory Rate</b>                                    |      |                           |                          |         |                          |                          |        |
| Respiratory Rate [2-11 months] (n, Mean $\pm$ SD)          | 1865 | 1243<br>55.52 $\pm$ 11.29 | 642<br>57.99 $\pm$ 11.70 | <0.0001 | 409<br>58.12 $\pm$ 11.88 | 233<br>57.74 $\pm$ 11.40 | 0.69   |
| Respiratory Rate [12-59 months] (n, Mean $\pm$ SD)         | 964  | 629<br>49.78 $\pm$ 12.41  | 335<br>51.28 $\pm$ 13.37 | 0.08    | 226<br>51.35 $\pm$ 13.31 | 109<br>51.12 $\pm$ 13.35 | 0.88   |
| Fast Breathing for age [2-11 months]                       | 1735 | 1130<br>(61.02)           | 605<br>(61.92)           | 0.11    | 384<br>(60.47)           | 221<br>(64.62)           | 0.69   |
| Fast Breathing for age [12-59 months]                      | 862  | 562<br>(30.35)            | 300<br>(30.71)           | 0.92    | 204<br>(32.13)           | 96<br>(28.07)            | 0.53   |
| <b>Signs of Pneumonia with a general danger sign n (%)</b> |      |                           |                          |         |                          |                          |        |
| Lethargy or reduced level of consciousness                 | 1101 | 732<br>(39.52)            | 369<br>(37.77)           | 0.39    | 247<br>(38.90)           | 122<br>(35.67)           | 0.33   |
| Inability to breastfeed or drink                           | 937  | 612<br>(33.05)            | 325<br>(33.27)           | 0.46    | 211<br>(33.23)           | 114<br>(33.33)           | 0.97   |
| Convulsions                                                | 148  | 98<br>(5.29)              | 50<br>(5.12)             | 0.93    | 33<br>(5.20)             | 17<br>(4.97)             | 0.87   |
| Central Cyanosis                                           | 62   | 39                        | 23                       | 0.34    | 16                       | 7                        | 0.64   |

1  
2

|                            |      |                 |                |          |                |                |      |
|----------------------------|------|-----------------|----------------|----------|----------------|----------------|------|
|                            |      | (2.11)          | (2.35)         |          | (2.52)         | (2.05)         |      |
| <b>Malnutrition Status</b> |      |                 |                |          |                |                |      |
| Normal *                   | 1880 | 1293<br>(69.82) | 587<br>(60.08) | < 0.0001 | 367<br>(57.80) | 220<br>(64.33) | 0.06 |
| Malnutrition*              | 517  | 333<br>(17.98)  | 184<br>(18.83) |          | 122<br>(19.21) | 62<br>(18.13)  |      |
| Severe malnutrition*       | 432  | 226<br>(12.20)  | 206<br>(21.08) |          | 146<br>(22.99) | 60<br>(17.54)  |      |

14 273 \*Normal-weight of age z score > -2SD; Malnutrition-weight-for-age z ≤ -2SD and Severe  
15 274 malnutrition-weight-for- age z ≤ -3SD

16 275  
17  
18  
19  
20 276 **Table 3** describes four multivariate unconditional logistic regression models to find associates of  
21  
22 277 abnormal CXR findings. After controlling for age, gender, symptoms of pneumonia, duration of  
23  
24 278 illness, biomass fuel and malnutrition status of cases, statistically significant district-wise  
25  
26 279 heterogeneity remained in the first three models. Models I, II and III had similar associates for  
27  
28 280 radiological abnormalities whereas Model IV was different. Across all the four models, female  
29  
30 281 gender and those with severe malnutrition had statistically significantly higher risk for having  
31  
32 282 abnormal CXRs. A higher risk of radiological abnormalities was also observed in those children  
33  
34  
35 283 with longer duration of illness.

36  
37  
38 284  
39 285 **Table 3: Independent Associations between Chest Radiograph Findings and demographic**  
40 286 **and clinical factors, among hospitalized children January 2015-April 2017**

| Variables          | Model – I<br>Abnormal/Normal <sup>Ref</sup> |         | Model – II<br>PEP alone or with<br>other infiltrate<br>/Normal <sup>Ref</sup> |         | Model – III<br>PEP alone / Normal <sup>Ref</sup> |         | Model – IV<br>Other infiltrate /<br>Normal <sup>Ref</sup> |            |
|--------------------|---------------------------------------------|---------|-------------------------------------------------------------------------------|---------|--------------------------------------------------|---------|-----------------------------------------------------------|------------|
|                    | Adjusted<br>Odd Ratio<br>(95%CI)            | p value | Adjusted<br>Odd Ratio<br>(95%CI)                                              | p value | Adjusted<br>Odd Ratio<br>(95%CI)                 | p value | Adjusted<br>Odd Ratio<br>(95%CI)                          | P<br>value |
| <b>Districts</b>   |                                             |         |                                                                               |         |                                                  |         |                                                           |            |
| Lucknow vs. Others | 1.58<br>(1.20-2.10)                         | <0.0001 | 2.07<br>(1.48-2.89)                                                           | <0.0001 | 2.20<br>(1.52-3.19)                              | <0.0001 | 0.98<br>(0.65-1.47)                                       | 0.93       |
| Etawah vs. Others  | 1.22<br>(0.88-1.70)                         | 0.23    | 1.30<br>(0.87-1.95)                                                           | 0.19    | 1.49<br>(0.95-2.30)                              | 0.07    | 1.17<br>(0.74-1.87)                                       | 0.50       |
| Patna vs. Others   | 1.67<br>(1.27-2.20)                         | <0.0001 | 1.89<br>(1.36-2.64)                                                           | <0.0001 | 2.25<br>(1.56-3.24)                              | <0.0001 | 1.39<br>(0.95-2.07)                                       | 0.09       |

|                                            |                     |         |                     |         |                     |         |                     |       |
|--------------------------------------------|---------------------|---------|---------------------|---------|---------------------|---------|---------------------|-------|
| <b>Age – Group ( months)</b>               |                     |         |                     |         |                     |         |                     |       |
| 2-11 <sup>Ref</sup>                        |                     |         |                     |         |                     |         |                     |       |
| 12-59                                      | 0.92<br>(0.77-1.10) | 0.34    | 0.95<br>(0.77-1.17) | 0.62    | 1.03<br>(0.82-1.29) | 0.79    | 0.86<br>(0.66-1.13) | 0.27  |
| <b>Gender</b>                              |                     |         |                     |         |                     |         |                     |       |
| Male <sup>Ref</sup>                        |                     |         |                     |         |                     |         |                     |       |
| Female                                     | 1.39<br>(1.16-1.66) | <0.0001 | 1.34<br>(1.08-1.65) | 0.008   | 1.28<br>(1.01-1.61) | 0.03    | 1.48<br>(1.14-1.92) | 0.004 |
| <b>Symptoms of pneumonia<sup>†</sup></b>   |                     |         |                     |         |                     |         |                     |       |
| Wheezing                                   | 0.83<br>(0.68-1.01) | 0.06    | 0.72<br>(0.57-0.90) | 0.005   | 0.75<br>(0.59-0.96) | 0.02    | 1.14<br>(0.83-1.55) | 0.42  |
| Pallor                                     | 1.30<br>(1.08-1.58) | 0.006   | 1.28<br>(1.03-1.60) | 0.02    | 1.22<br>(0.95-1.55) | 0.12    | 1.34<br>(1.01-1.77) | 0.04  |
| Vomiting everything                        | 0.90<br>(0.75-1.09) | 0.28    | 0.80<br>(0.64-0.99) | 0.04    | 0.78<br>(0.62-1.01) | 0.05    | 1.09<br>(0.83-1.08) | 0.51  |
| <b>Duration of illness, fever ( days )</b> | 1.06<br>(1.04-1.09) | <0.0001 | 1.08<br>(1.04-1.12) | <0.0001 | 1.08<br>(1.04-1.12) | <0.0001 | 1.03<br>(0.98-1.48) | 0.24  |
| <b>Biomass fuel</b>                        | 1.28<br>(1.05-1.57) | 0.02    | 1.39<br>(1.10-1.76) | 0.006   | 1.40<br>(1.14-1.88) | 0.003   | 1.08<br>(0.79-1.45) | 0.64  |
| <b>Malnutrition Status</b>                 |                     |         |                     |         |                     |         |                     |       |
| Normal <sup>*Ref</sup>                     |                     |         |                     |         |                     |         |                     |       |
| Malnutrition*                              | 1.18<br>(0.93-1.45) | 0.15    | 1.17<br>(0.91-1.52) | 0.23    | 1.17<br>(0.88-1.55) | 0.27    | 1.12<br>(0.82-1.52) | 0.47  |
| Severe malnutrition*                       | 1.65<br>(1.31-2.09) | <0.0001 | 1.82<br>(1.34-2.36) | <0.0001 | 1.87<br>(1.41-2.47) | <0.0001 | 1.62<br>(1.71-2.23) | 0.003 |

287 **Abbreviations used:** <sup>Ref</sup> Reference Category

288

289 **Footnotes:** <sup>†</sup> No signs of pneumonia taken as a reference

290 \*Normal: weight-for-age z score > -2SD; Malnutrition: weight-for-age z ≤ -2SD; Severe  
291 malnutrition: weight-for-age z ≤ -3SD

## 292 DISCUSSION

293 This active, prospective hospital-based surveillance study was conducted to assess the  
294 radiological abnormalities in children (2-59 months) residing in pre-specified districts of Uttar  
295 Pradesh and Bihar, India and hospitalized with CAP. The study was conducted from January  
296 2015 to April 2017, prior to introduction of PCV in the national immunization programme of the  
297 Government of India<sup>9</sup>.

298



1  
2  
3 299 In our study, among interpretable CXRs, we found that 22.44% (635/2829) children had PEP  
4  
5 300 alone or with infiltrates, 12.09% (342/2829) had other infiltrates only and 65.46% (1852/2829)  
6  
7 301 had normal CXRs findings. Our study used WHO case definition for CAP<sup>19</sup>. A panel of three  
8  
9 302 trained radiologists interpreted CXRs, adopting WHO recommended methodology<sup>11 12</sup>. These  
10  
11 303 make our study methodology robust and results generalizable.  
12  
13  
14

15 304  
16  
17 305 There were 88.54% (2829/3195) interpretable CXRs in the current study. This is similar to 83%  
18  
19 306 (3587/3973) interpretable CXRs reported by Pneumonia Etiology Research for Child Health  
20  
21 307 (PERCH) study conducted on 4232 children (1-59 months) to assess the etiology of CAP in nine  
22  
23 308 sites of seven countries<sup>27</sup>. Consistent with PERCH findings, a vaccine probe trial conducted in  
24  
25 309 Gambia found the proportion of interpretable CXRs among unvaccinated cases of pneumonia to  
26  
27 310 be 84.32% (242/287)<sup>28</sup>.  
28  
29  
30

31 311  
32  
33 312 There have been several studies in the past two decades, which have reported CXRs findings in  
34  
35 313 hospitalized cases of CAP. Almost all of these were conducted before the introduction of PCV in  
36  
37 314 their respective regions. A small prospective study conducted in Ethiopia reported radiological  
38  
39 315 abnormality in CXRs in 48.3% (95% CI 39.49-57.22) among 122 children (3 months-14 years)  
40  
41 316 clinically diagnosed with WHO-defined severe pneumonia<sup>29</sup>. Similar findings were reported  
42  
43 317 from the Gambian vaccine probe trial where the proportion of radiological abnormality was 45%  
44  
45 318 (95% CI: 43.35-46.46) among unvaccinated hospitalized cases of clinical pneumonia<sup>28</sup>. PERCH  
46  
47 319 study found that 54% (95% CI: 52.31-55.57) of CXRs among cases of CAP were abnormal<sup>27</sup>.  
48  
49 320 In all of these studies, proportion of cases with abnormal CXRs is higher than 34.5% (95% CI  
50  
51 321 32.8-36.3) found by us in the current study. However, our findings are similar to PERCH rural  
52  
53  
54  
55  
56  
57  
58  
59

1  
2  
3 322 study site of Matlab, Bangladesh that reported radiological abnormality in 35.3% (95% CI:  
4  
5 323 29.77-40.85) CXRs of hospitalized cases of CAP<sup>27</sup>. Another PERCH urban site of Dhaka,  
6  
7 324 Bangladesh reported 63.10% (95% CI 56.18 -70.02) cases with abnormal CXRs<sup>27</sup>. In our study,  
8  
9 325 radiological abnormalities in CXRs were higher in cases from largely urban districts of Patna and  
10  
11 326 Lucknow compared to rural districts of Darbhanga and Etawah. This is consistent with rural-  
12  
13 327 urban differences in Bangladesh sites of PERCH. Variation in CXR findings among cases of  
14  
15 328 CAP may be due to infecting organism, immune response of patient and prior duration of  
16  
17 329 disease.  
18  
19  
20  
21  
22 330

23  
24 331 In 2016, WHO's Department of Immunization, Vaccines and Biologicals standardized the  
25  
26 332 categorization of radiological pneumonia and established that PEP can be taken as a good  
27  
28 333 surrogate marker of bacterial pneumonia in epidemiological and vaccine efficacy studies<sup>12</sup>. In  
29  
30 334 our study, 22.44 % (95% C.I. 20.90 -23.98), CXRs were having PEP alone or with other  
31  
32 335 infiltrates. This is similar to PERCH study that reported PEP alone or with other infiltrates in  
33  
34 336 27% (95% C.I. 25.50 -28.40) hospitalized cases of CAP<sup>27</sup>. Another study conducted in Gambia  
35  
36 337 reported that 45% (95% CI: 43.35-46.46) non-vaccinated children had PEP and/or other  
37  
38 338 infiltrates<sup>28</sup>. PEP has been associated with increased risk of treatment failure (p=0.002),  
39  
40 339 increased length of hospitalization (p=0.0003) and more days of respiratory support (p=0.002) in  
41  
42 340 Botswana when compared with cases reporting `no significant pathology` on CXRs<sup>30</sup>.  
43  
44  
45  
46

47 341  
48  
49 342 In our study, female gender (p<0.001) was at the higher risk of developing radiological  
50  
51 343 abnormalities compared to males (**table 3**). The results are in concordance with a hospital-based  
52  
53 344 case-control study carried out in Brazil that reported male gender as a protective factor against  
54  
55  
56  
57  
58  
59

1  
2  
3 345 pneumonia (OR = 0.53; 95 % CI 0.39–0.72)<sup>31</sup>. Another study in Mozambique, Africa reported  
4  
5 346 that male gender was not significantly associated with presence of radiological abnormalities  
6  
7 347 (OR =0.77; 95 % CI 0.56–1.05) in children (0-59 months) suffering from severe pneumonia<sup>32</sup>.  
8  
9  
10 348 However, in contrast, a Gambian study reported male preponderance for all pneumonia that was  
11  
12 349 most marked for `other infiltrates/abnormalities` pneumonia<sup>28</sup>.

13  
14  
15 350

16  
17 351 In our study, it was observed that there was differential care-seeking by gender for CAP in all  
18  
19 352 four project sites. Although females admitted with CAP were at higher risk of having  
20  
21 353 radiological abnormalities, lower proportion were hospitalized for it. Gender inequality in health  
22  
23 354 care seeking for females is common in India, as in other South Asian countries<sup>33 34</sup>. Since there  
24  
25 355 is no health-care financing or health insurance provision in India, in case of severe illness,  
26  
27 356 parents are less likely to incur out-of-pocket expenditure or incur debts to pay expenses on  
28  
29 357 medical treatment of their daughters compared to sons<sup>35</sup>. Another Indian study found that male  
30  
31 358 children were five times more likely to be taken early for medical care and three times more  
32  
33 359 likely to be seen by qualified medical doctors compared to female children<sup>36</sup>. We also found  
34  
35 360 that majority of hospitalized cases of pneumonia were from urban areas, in contrast with  
36  
37 361 observations of other researchers who report poor health care seeking from rural areas<sup>37</sup>.

38  
39  
40 362

41  
42  
43  
44 363 A systematic review with meta-analysis conducted in 2019 suggests that no one clinical feature  
45  
46 364 is sufficient on its own to diagnose radiological pneumonia<sup>38</sup>. However other socio-  
47  
48 365 demographic and clinical correlates of abnormal CXRs found by us (Model 1), which increased  
49  
50 366 the risk of radiological abnormalities, were presence of pallor, severe malnutrition, longer  
51  
52 367 duration of illness and exposure to biomass fuel. Exposure to biomass fuel used for cooking is an

1  
2  
3 368 important factor that increases the risk of CAP in developing countries<sup>39</sup>. In rural India, majority  
4  
5 369 of the households use biomass fuel like firewood, dung cakes and wood for cooking <sup>40</sup>. Young  
6  
7  
8 370 children are at risk to adverse effects of exposure to biomass fuel as either the households have  
9  
10 371 no separate cooking space or have poor ventilation and sometimes young children stay with their  
11  
12 372 mother while she cooks.

13  
14 373  
15  
16 374 Other correlates of PEP/Radiological Pneumonia (Models II and III), besides those found in  
17  
18  
19 375 Model I, were presence of vomiting everything and wheeze on auscultation, both of which were  
20  
21 376 found to be protective. These symptoms/signs are more often reported in viral pneumonia<sup>41</sup>.  
22  
23 377 Correlates of radiological abnormalities of `other infiltrates` (Model IV), which increased the  
24  
25  
26 378 risk, were again female gender, pallor and severe malnutrition. Hence it is difficult to attribute  
27  
28 379 radiological findings of other infiltrates to either bacterial or viral etiology.

29  
30 380  
31  
32 381 Based on our study, almost two-third hospitalized cases of CAP had normal CXRs and this could  
33  
34  
35 382 be perhaps of viral etiology. This is supported by a recent study that reported 61.4% (95% CI  
36  
37 383 57.3–65.6) cases to be viral<sup>41</sup>. Among one-third of cases of CAP had abnormal CXRs and thus  
38  
39  
40 384 were more likely to be bacterial in etiology.

41  
42 385  
43  
44 386 In India, 13-valent PCV is given using a three dose schedule (2 primary and one booster) at 6  
45  
46  
47 387 weeks, 14 weeks and 9 months of age. PCV 13 provides coverage against 13 serotypes (1, 3, 4,  
48  
49 388 5, 6A, 6B, 7F, 9V, 14, 18C, 19A, 19F and 23F) causing pneumococcal pneumonia<sup>42</sup>. Several  
50  
51 389 studies have assessed serotype distribution of pneumococcal disease among children in India. A  
52  
53  
54 390 study conducted in Vellore, India found that the most common serotypes causing invasive

1  
2  
3 391 infections among under-five children were 14, 19F, 5, 6A and 6B, all of which were covered by  
4  
5 392 the 13-valent PCV <sup>43</sup>. Another population-based surveillance study conducted in rural  
6  
7  
8 393 Bangladesh found that the most common serotypes were 1, 5, 14, 18C and 19A and 38 and these  
9  
10 394 comprised more than three-fourth of the *S. pneumoniae* isolates <sup>44</sup>. A systematic review and  
11  
12 395 meta-analysis of data collected on Invasive Pneumococcal Disease serotypes from under-five  
13  
14 396 children during the pre-PCV period (between 1980–2007) found that serotypes included in both  
15  
16 397 the 10-valent and 13-valent PCVs accounted for 10 million cases and 600,000 deaths  
17  
18  
19 398 worldwide<sup>45</sup>.

20  
21  
22 399  
23  
24  
25 400 Several strengths of the study are worth-noting. This was an active, prospective, multi-site study  
26  
27 401 where recruitments were done from a large hospital surveillance network established especially  
28  
29 402 for the study in four districts of two Indian states that have high under-five mortality rates.  
30  
31 403 Standard WHO definition was used to identify hospitalized cases of CAP. Radiological  
32  
33 404 abnormalities were interpreted by a panel of three trained radiologists at locations out of the  
34  
35 405 surveillance network, blinded to each other as well as clinical features of the case. Despite these  
36  
37 406 strengths, our study findings have certain limitations. First, in our study, pre-existing x-rays  
38  
39 407 machines which were not of uniform specification, were used. This might have caused variation  
40  
41 408 in quality of CXR images, though this error was minimized by digitizing the CXR images  
42  
43 409 centrally. Secondly, in our study, clinical data collection was recorded by physicians in the  
44  
45 410 network hospitals and this could be subject to observer bias. This could also have lead to  
46  
47 411 possibly over reporting of presence of wheezing. In this study, we have not collected information  
48  
49 412 on use of antibiotic prior to hospitalizations, as such information is not available reliably.  
50  
51  
52 413 However, in another study, done in one of the network hospitals of Lucknow in the recent past, it  
53  
54  
55  
56  
57  
58  
59  
60

1  
2  
3 414 was found that 70.5% children tested positive for antibiotics on urine examination<sup>46</sup>. Prior use of  
4  
5 415 antibiotics could have possibly lead to underestimation of radiological pneumonia. We also  
6  
7  
8 416 observed that pulse oxymetry was routinely done in the network hospitals. This could have an  
9  
10 417 impact on the case management but would not have affected the radiological findings of CXRs.  
11  
12

13 418

## 16 419 CONCLUSION

19 420 Among hospitalized cases of community-acquired pneumonia, almost one-third children had  
20  
21 421 abnormal chest radiographs of which about two-thirds had abnormalities related with possible  
22  
23 422 bacterial etiology (*Streptococcus pneumoniae*). Hence, the introduction of pneumococcal  
24  
25 423 vaccination is likely to reduce the burden of childhood pneumonia in India. Since the study was  
26  
27 424 done prior to the introduction of PCV in India, continued surveillance will be required to assess  
28  
29 425 the impact of PCV on radiological findings in cases admitted with CAP. The impact of  
30  
31 426 introduction of PCV in the national immunization programme on under-five mortality rate and  
32  
33 427 burden of CAP needs to be assessed.  
34  
35  
36  
37

38 428

40 429 **Acknowledgements:** We thank the state governments of Uttar Pradesh and Bihar for giving  
41  
42 430 us permission to conduct the study. We extend our gratitude to participating tertiary and  
43  
44 431 secondary care hospitals for their contribution in the study. We offer thanks to Dr. Kamrun  
45  
46 432 Nahar from the International Centre for Diarrhoeal Disease Research, Bangladesh for imparting  
47  
48 433 training to the panel of study radiologists. Members of the Lucknow Community-Acquired  
49  
50 434 Pneumonia (CAP) Group: King George's Medical University (KGMU), Lucknow, India: Prof.  
51  
52 435 Shally Awasthi, Department of Pediatrics, Prof. Neera Kohli, Department of Radio-diagnosis,  
53  
54  
55  
56  
57  
58  
59  
60

1  
2  
3 436 Prof. Monika Agarwal, Department of Community Medicine; Mr. Puneet Dhasmana, Project  
4  
5 437 Staff; Patna Medical College and Hospital, Patna, Bihar-Prof. Neelam Verma and Prof. Chandra  
6  
7 438 Bhushan Kumar, Department of Pediatrics; Darbhanga Medical College and Hospital,  
8  
9 439 Darbhanga, Bihar, India- Prof. Chittaranjan Roy, Department of Community Medicine, Prof.  
10  
11 440 Kripanath Mishra, Department of Pediatrics; Uttar Pradesh University of Medical Sciences,  
12  
13 441 Etawah, Uttar Pradesh, India- Prof. Pankaj Kumar Jain, Department of Community Medicine,  
14  
15 442 Prof. Rajesh Yadav, Department of Pediatrics.

16  
17 443 **Contributors:** The study was conceived and designed by SA. CAP study group performed data  
18  
19 444 acquisition. CMP and NM<sup>1</sup> conducted the statistical analysis of the data. The paper was written by  
20  
21 445 SA, TR, MA and CMP. AC, NM<sup>3</sup>, RCS and NK interpreted chest x-rays. All authors were  
22  
23 446 involved with drafting and revising the work and approved the final submission.

24  
25 447 **Funding statement:** The study was supported by Bill & Melinda Gates Foundation  
26  
27 448 (<https://www.gatesfoundation.org/>) via Grant No: OPP1118005. Funding agency had no role in  
28  
29 449 the design of the study and collection, analysis and interpretation of data, or in writing the  
30  
31 450 manuscript.

32  
33 451 **Competing interests:** None declared.

34  
35 452 **Patient consent for publication:** Not required.

36  
37 453 **Ethics approval:** The Institutional Ethics Committee of King George's Medical University  
38  
39 454 (Lucknow), The Uttar Pradesh University of Medical Sciences (Etawah), Patna Medical College  
40  
41 455 and Hospital (Patna) and Darbhanga Medical College and Hospital (Darbhanga) gave ethical  
42  
43 456 approval for the conduct of study.

44  
45 457 **Provenance and peer review:** Not commissioned; externally peer reviewed.

1  
2  
3 458 **Data sharing statement:** The data contained within this study can be obtained by writing to

4  
5 459 [shally07@gmail.com](mailto:shally07@gmail.com)

6  
7  
8 460 **Copyright information:** This is an Open Access article distributed in accordance with the

9  
10 461 Creative Commons Attribution Non Commercial (CC BY-NC 4.0) license, which permits others

11  
12 462 to distribute, remix, adapt, build upon this work non-commercially, and license their derivative

13  
14 463 works on different terms, provided the original work is properly cited and the use is non-

15  
16 464 commercial. See: <http://creativecommons.org/licenses/by-nc/4.0/>

17  
18  
19 465

## 20 21 466 **Supporting Information**

22  
23  
24 467 S1 Appendix: Chest radiograph interpretation form

25  
26  
27 468

## 28 29 30 469 **REFERENCES:**

31  
32  
33 470 1. UNICEF U. Levels and trends in child mortality. Estimates developed by the UN inter-  
34  
35 471 agency group for child mortality estimation. 2011.

36  
37 472 2. Amouzou A, Velez LC, Tarekegn H, *et al.* One is too many: ending child deaths from  
38  
39 473 pneumonia and diarrhoea. New York: Unicef, 2016. pp 73–75

40  
41 474 3. Mathew JL, Patwari AK, Gupta P, *et al.* Acute respiratory infection and pneumonia in India:  
42  
43 475 a systematic review of literature for advocacy and action: UNICEF-PHFI series on newborn  
44  
45 476 and child health, India. *Indian Pediatr*2011; 48: 191–218.

46  
47  
48  
49 477 4. Farooqui H, Jit M, Heymann DL, *et al.* Burden of severe pneumonia, pneumococcal  
50  
51 478 pneumonia and pneumonia deaths in Indian states: modelling based estimates. *PLoS One*  
52  
53 479 2015



- 1  
2  
3 480 5. Rudan I, O'Brien KL, Nair H, *et al.* Epidemiology and etiology of childhood pneumonia in  
4  
5 481 2010: estimates of incidence, severe morbidity, mortality, underlying risk factors and  
6  
7 482 causative pathogens for 192 countries. *Journal of global health*. 2013 Jun;3(1).  
8  
9  
10 483 6. Leung DT, Chisti MJ, Pavia AT. Prevention and control of childhood pneumonia and  
11  
12 484 diarrhea. *Pediatric Clinics*. 2016 Feb 1;63(1):67-79.  
13  
14  
15 485 7. Virkki R, Juven T, Rikalainen H, *et al.* Differentiation of bacterial and viral pneumonia in  
16  
17 486 children. *Thorax*. 2002 May 1;57(5):438-41.  
18  
19 487 8. World Health Organization. Pneumococcal conjugate vaccines in infants and children under  
20  
21 488 5 years of age: WHO position paper—February 2019. Accessed 12th July 2019.  
22  
23  
24 489 9. Government of India. Introduction of Pneumococcal Conjugate Vaccine: Operational  
25  
26 490 Guidelines. Ministry of Health and Family Welfare, 2017 Available at:  
27  
28 491 [https://nhm.gov.in/New\\_Updates\\_2018/NHM\\_Components/Immunization/Guidelines\\_for\\_i](https://nhm.gov.in/New_Updates_2018/NHM_Components/Immunization/Guidelines_for_immunization/Operational_Guidelines_for_PCV_introduction.pdf)  
29  
30 492 [mmunization/Operational\\_Guidelines\\_for\\_PCV\\_introduction.pdf](https://nhm.gov.in/New_Updates_2018/NHM_Components/Immunization/Guidelines_for_immunization/Operational_Guidelines_for_PCV_introduction.pdf). Accessed 12 July 2019.  
31  
32  
33 493 10. Cherian T, Mulholland EK, Carlin JB, *et al.* Standardized interpretation of paediatric chest  
34  
35 494 radiographs for the diagnosis of pneumonia in epidemiological studies. *Bulletin of the World*  
36  
37 495 *Health Organization*. 2005;83:353-9  
38  
39  
40 496 11. Pneumonia Vaccine Trial Investigators' Group. Standardization of Interpretation of Chest  
41  
42 497 Radiographs for the Diagnosis of Pneumonia in Children. Geneva: Department of Vaccines  
43  
44 498 and Biologicals, World Health Organization; 2001  
45  
46  
47 499 12. Mahomed N, Fancourt N, De Campo J, *et al.* Preliminary report from the World Health  
48  
49 500 Organization chest radiography in epidemiological studies project. *Pediatric radiology*. 2017  
50  
51 501 Oct 1;47(11):1399-404.  
52  
53  
54  
55  
56  
57  
58  
59  
60

- 1  
2  
3 502 13. Greenberg D, Givon-Lavi N, Ben-Shimol S, *et al.* Impact of PCV7/PCV13 introduction on  
4  
5 503 community-acquired alveolar pneumonia in children < 5 years. *Vaccine*. 2015 Aug  
6  
7 504 26;33(36):4623-9. 6.
- 8  
9  
10 505 14. Sutcliffe CG, Shet A, Varghese R, *et al.* Nasopharyngeal carriage of *Streptococcus*  
11  
12 506 *pneumoniae* serotypes among children in India prior to the introduction of pneumococcal  
13  
14 507 conjugate vaccines: a cross-sectional study. *BMC Infect Dis*. 2019 Dec;19(1):605.
- 15  
16  
17 508 15. Annual health survey (AHS) factsheet 2012–13 Uttar Pradesh [Internet]. New Delhi: Office  
18  
19 509 of Registrar General & Census Commissioner, Ministry of Home Affairs, Government of  
20  
21 510 India; 2010–2011. Available  
22  
23 from:[http://www.censusindia.gov.in/vital\\_statistics/AHSBulletins/AHS\\_Factsheets\\_2012-](http://www.censusindia.gov.in/vital_statistics/AHSBulletins/AHS_Factsheets_2012-)  
24 511 [13/FACTSHEET-UTTAR\\_PRADESH.pdf](http://www.censusindia.gov.in/vital_statistics/AHSBulletins/AHS_Factsheets_2012-). Accessed 5<sup>th</sup> August, 2019.
- 25  
26 512  
27  
28 513 16. Annual health survey (AHS) factsheet 2012–13 Bihar [Internet]. New Delhi: Office of  
29  
30 514 Registrar General & Census Commissioner, Ministry of Home Affairs, Government of India;  
31  
32 515 2010–2011. Available  
33  
34 from:[http://www.censusindia.gov.in/vital\\_statistics/AHSBulletins/AHS\\_Factsheets\\_2012-](http://www.censusindia.gov.in/vital_statistics/AHSBulletins/AHS_Factsheets_2012-)  
35 516 [13/FACTSHEET-Bihar.pdf](http://www.censusindia.gov.in/vital_statistics/AHSBulletins/AHS_Factsheets_2012-). Accessed 5<sup>th</sup> August, 2019.
- 36  
37 517  
38  
39 518 17. Awasthi S, Pandey CM, Verma T, *et al.* Incidence of community-acquired pneumonia in  
40  
41 519 children aged 2-59 months of age in Uttar Pradesh and Bihar, India, in 2016: An indirect  
42  
43 520 estimation. *PloS one*. 2019 Mar 20;14(3):e0214086.
- 44  
45  
46 521 18. Awasthi S, Singh JV, Kohli N, *et al.* Hospital-based surveillance for radiological pneumonia  
47  
48 522 in children under 5 years of age in Uttar Pradesh and Bihar. *Pediatric Infectious Disease*.  
49  
50 523 2016 Jun 30;8(2):52-7.
- 51  
52  
53  
54  
55  
56  
57  
58  
59  
60

- 1  
2  
3 524 19. World Health Organization. Pocket Book of Hospital Care for Children: Guidelines for the  
4  
5 525 Management of Common Childhood Illnesses. 2nd edn. Geneva, Switzerland: World Health  
6  
7 526 Organization, 2013.
- 8  
9  
10 527 20. Charan J, Biswas T. How to calculate sample size for different study designs in medical  
11  
12 528 research?. *Indian journal of psychological medicine*. 2013 Apr;35(2):121.
- 13  
14 529 21. Integrated Management of Childhood Illness (IMCI) Chart Booklet [online] Geneva: World  
15  
16 530 Health Organization. Available at:  
17  
18 531 [https://apps.who.int/iris/bitstream/handle/10665/104772/9789241506823\\_Chartbook\\_eng.pdf](https://apps.who.int/iris/bitstream/handle/10665/104772/9789241506823_Chartbook_eng.pdf)  
19  
20 532 Accessed:19<sup>th</sup> December, 2019.
- 21  
22  
23 533 22. Bassignani MJ, Bubash-Faust L, Ciambotti J, *et al*. Conversion of teaching file cases from  
24  
25 534 film to digital format: a comparison between use of a diagnostic-quality digitizer and use of a  
26  
27 535 flatbed scanner with transparency adapter. *Acad Radiol*. 2003 May 1;10(5):536-42.
- 28  
29  
30 536 23. World Health Organization. The WHO Anthro Survey Analyser. In: World Health  
31  
32 537 Organization [Internet]. Available: <https://www.who.int/nutgrowthdb/software/en/>.  
33  
34 538 Accessed: 10<sup>th</sup> June, 2019.
- 35  
36  
37 539 24. Horton NJ, Kleinman KP. Much ado about nothing: A comparison of missing data methods  
38  
39 540 and software to fit incomplete data regression models. *The American Statistician*. 2007 Feb  
40  
41 541 1;61(1):79-90.
- 42  
43  
44 542 25. SPSS Inc. Released 2009. SPSS for Windows [software], Version 22.0. Chicago, SPSS Inc.  
45  
46 543 Available from:[www.spss.com](http://www.spss.com)
- 47  
48  
49 544 26. von Elm E, Altman DG, Egger M, *et al*. The strengthening the reporting of observational  
50  
51 545 studies in epidemiology (STROBE) statement: guidelines for reporting observational studies.  
52  
53 546 *J Clin Epidemiol* 2008;61:344–9

- 1  
2  
3 547 27. Fancourt N, Deloria Knoll M, Baggett HC, *et al.* Chest radiograph findings in childhood  
4  
5 548 pneumonia cases from the multisite PERCH study. *Clin Infect Dis.* 2017 May  
6  
7 549 29;64(suppl\_3):S262-70  
8  
9  
10 550 28. Enwere G, Cheung YB, Zaman SM, *et al.* Epidemiology and clinical features of pneumonia  
11  
12 551 according to radiographic findings in Gambian children. *Trop Med Int Health.* 2007  
13  
14 552 Nov;12(11):1377-85.  
15  
16  
17 553 29. Meiron Hassen, Alemayehu Toma, Mulugeta Tesfay, *et al.* Radiologic Diagnosis and  
18  
19 554 Hospitalization among Children with Severe Community Acquired Pneumonia: A  
20  
21 555 Prospective Cohort Study. *Biomed Res Int*, vol. 2019, Article ID 6202405, 8 pages, 2019.  
22  
23 556 <https://doi.org/10.1155/2019/6202405>.  
24  
25  
26 557 30. Kelly MS, Crotty EJ, Rattan MS, *et al.* Chest radiographic findings and outcomes of  
27  
28 558 pneumonia among children in Botswana. *Pediatr Infect Dis J.* 2016 Mar;35(3):257.  
29  
30  
31 559 31. da Fonseca Lima EJ, Mello MJ, Lopes MI, *et al.* Risk factors for community-acquired  
32  
33 560 pneumonia in children under five years of age in the post-pneumococcal conjugate vaccine  
34  
35 561 era in Brazil: a case control study. *BMC Pediatr.* 2016 Dec;16(1):157.  
36  
37  
38 562 32. Sigauque B, Roca A, Bassat Q, *et al.* Severe pneumonia in Mozambican young children:  
39  
40 563 clinical and radiological characteristics and risk factors. *J Trop Pediatr.* 2009 Apr  
41  
42 564 28;55(6):379-87.  
43  
44  
45 565 33. Ismail SA, McCullough A, Guo S, *et al.* Gender-related differences in care-seeking  
46  
47 566 behaviour for newborns: a systematic review of the evidence in South Asia. *BMJ global*  
48  
49 567 *health.* 2019 May 1;4(3):e001309.  
50  
51  
52 568 34. Fikree FF, Pasha O. Role of gender in health disparity: the South Asian context. *BMJ*  
53  
54 569 2004;328:823–6. 10.1136/bmj.328.7443.823  
55  
56  
57  
58  
59  
60

- 1  
2  
3 570 35. Asfaw A, Lamanna F, Klasen S. Gender gap in parents' financing strategy for hospitalization  
4  
5 571 of their children: evidence from India. *Health economics*. 2010 Mar;19(3):265-79.  
6  
7  
8 572 36. Pandey A, Sengupta PG, Mondal SK, *et al*. Gender differences in healthcare-seeking during  
9  
10 573 common illnesses in a rural community of West Bengal, India. *Journal of Health, Population*  
11  
12 574 *and Nutrition*. 2002 Dec 1:306-11.  
13  
14  
15 575 37. Jana A, Basu R. Examining the changing health care seeking behavior in the era of health  
16  
17 576 sector reforms in India: evidences from the National Sample Surveys 2004 & 2014. *Global*  
18  
19 577 *health research and policy*. 2017 Dec;2(1):6.  
20  
21  
22 578 38. Rambaud-Althaus C, Althaus F, Genton B, *et al*. Clinical features for diagnosis of  
23  
24 579 pneumonia in children younger than 5 years: a systematic review and meta-analysis. *Lancet*  
25  
26 580 *Infect Dis*. 2015 Apr 1;15(4):439-50  
27  
28  
29 581 39. Awasthi S, Glick AH, Fletcher RH. Effect of cooking fuels on Respiratory Diseases in Pre-  
30  
31 582 school children in Lucknow, India. *Am J Trop Med Hyg* 1996; 55: 48-51  
32  
33 583 40. Tielsch JM, Katz J, Thulasiraj RD, *et al*. Exposure to indoor biomass fuel and tobacco smoke  
34  
35 584 and risk of adverse reproductive outcomes, mortality, respiratory morbidity and growth  
36  
37 585 among newborn infants in south India. *Int J Epidemiol*. 2009 Sep 16;38(5):1351-63.  
38  
39  
40 586 41. O'Brien KL, Baggett HC, Brooks WA, *et al*. Causes of severe pneumonia requiring hospital  
41  
42 587 admission in children without HIV infection from Africa and Asia: the PERCH multi-country  
43  
44 588 case-control study. *The Lancet*. 2019 Jun 27  
45  
46  
47 589 42. World Health Organization. Pneumococcal conjugate vaccines in infants and children under  
48  
49 590 5 years of age: WHO position paper–February 2019. Accessed 12th March. 2019.  
50  
51  
52  
53  
54  
55  
56  
57  
58  
59  
60

- 1  
2  
3 591 43. Balaji V, Jayaraman R, Verghese VP, Baliga PR, Kurien T. Pneumococcal serotypes  
4 associated with invasive disease in under five children in India & implications for vaccine  
5 592 policy. *The Indian journal of medical research*. 2015 Sep;142(3):286.  
6  
7  
8 593  
9  
10 594 44. Arifeen SE, Saha SK, Rahman S, Rahman KM, Rahman SM, Bari S, Naheed A, Mannan I,  
11 Seraji MH, Ahmed NU, Shameem Hassan M. Invasive pneumococcal disease among  
12 595 children in rural Bangladesh: results from a population-based surveillance. *Clinical*  
13 Infectious Diseases. 2009 Mar 1;48 (Supplement\_2):S103-13.  
14  
15 596  
16  
17 597  
18  
19 598 45. Johnson HL, Deloria-Knoll M, Levine OS, Stoszek SK, Hance LF, Reithinger R, Muenz LR,  
20 O'Brien KL. Systematic evaluation of serotypes causing invasive pneumococcal disease  
21 599 among children under five: the pneumococcal global serotype project. *PLoS medicine*. 2010  
22 600 Oct 5;7(10):e1000348  
23  
24  
25  
26 601  
27  
28 602 46. Bénet T, Picot VS, Awasthi S, Pandey N, Bavdekar A, Kawade A, Robinson A, Rakoto-  
29 603 Andrianarivelo M, Sylla M, Diallo S, Russomando G. Severity of pneumonia in under 5-  
30 604 year-old children from developing countries: a multicenter, prospective, observational study.  
31  
32  
33 605  
34  
35  
36 606  
37  
38  
39  
40

### 607 **Figure Legend**

608 Figure 1: Flow diagram of cases of community acquired pneumonia recruited from participating  
609 districts before the introduction of pneumococcal conjugate vaccine (January 2015-April 2017)

Figure 1: Flow diagram of cases of community acquired pneumonia recruited from participating districts before introduction of pneumococcal conjugate vaccine (January 2015-April 2017)



Figure 1: Flow diagram of cases of community acquired pneumonia recruited from participating districts before the introduction of pneumococcal conjugate vaccine (January 2015-April 2017)

254x190mm (300 x 300 DPI)

**Childhood Pneumonia Surveillance**  
Department of Paediatrics, KGMU, Lucknow ,UP

**Form-R**  
(RADIOLOGY REPORT FORM)

|    |                                        |                                                                                                                                                                                                                                                                                      |
|----|----------------------------------------|--------------------------------------------------------------------------------------------------------------------------------------------------------------------------------------------------------------------------------------------------------------------------------------|
| 1  | <b>Drs_ID</b>                          | [ ][ ][ ][ ]                                                                                                                                                                                                                                                                         |
|    | <b>Radiology Report</b>                | <b>Patient Details</b>                                                                                                                                                                                                                                                               |
| 2  | <b>IDNo:</b>                           | [ ] / [ ] / [ ][ ][ ][ ][ ][ ]<br>State /District / Unit / Subject number<br>(For office use)                                                                                                                                                                                        |
| 2  | <b>Date Of Report</b>                  | [ ][ ]/[ ][ ]/[ ][ ][ ][ ] (DD/MM/YYYY)                                                                                                                                                                                                                                              |
|    | <b>Report Details</b>                  | <b>Findings ( tick one)</b>                                                                                                                                                                                                                                                          |
| 3  | <b>Image Quality</b>                   | Adequate <input type="checkbox"/> Suboptimal <input type="checkbox"/> Un-interpretable <input type="checkbox"/>                                                                                                                                                                      |
| 4  | <b>Significant Pathology</b>           | Yes <input type="checkbox"/> No <input type="checkbox"/> Un-interpretable <input type="checkbox"/>                                                                                                                                                                                   |
| 5  | <b>End Point Consolidation</b>         |                                                                                                                                                                                                                                                                                      |
| 5a | Left                                   | Yes <input type="checkbox"/> No <input type="checkbox"/> Un-interpretable <input type="checkbox"/>                                                                                                                                                                                   |
| 5b | Right                                  | Yes <input type="checkbox"/> No <input type="checkbox"/> Un-interpretable <input type="checkbox"/>                                                                                                                                                                                   |
|    |                                        | Uninterpretable                                                                                                                                                                                                                                                                      |
| 6  | <b>Other Infiltrates/Abnormalities</b> |                                                                                                                                                                                                                                                                                      |
| 6a | Left                                   | Yes <input type="checkbox"/> No <input type="checkbox"/> Un-interpretable <input type="checkbox"/>                                                                                                                                                                                   |
| 6b | Right                                  | Yes <input type="checkbox"/> No <input type="checkbox"/> Un-interpretable <input type="checkbox"/>                                                                                                                                                                                   |
| 7  | <b>Pleural Fluid</b>                   |                                                                                                                                                                                                                                                                                      |
| 7a | Left                                   | Yes <input type="checkbox"/> No <input type="checkbox"/> Un-interpretable <input type="checkbox"/>                                                                                                                                                                                   |
| 7b | Right                                  | Yes <input type="checkbox"/> No <input type="checkbox"/> Un-interpretable <input type="checkbox"/>                                                                                                                                                                                   |
| 8  | <b>Comments:</b>                       | <input type="text"/>                                                                                                                                                                                                                                                                 |
| 9  | <b>Conclusion:</b>                     | a) Primary endpoint pneumonia only <input type="checkbox"/><br>b) Other infiltrate only <input type="checkbox"/><br>c) Both PEP and other infiltrate <input type="checkbox"/><br>d) Normal <input type="checkbox"/><br>e) Un-interpretable for any findings <input type="checkbox"/> |



1  
2  
3  
4  
5  
6  
7  
8  
9  
10  
11  
12  
13  
14  
15  
16  
17  
18  
19  
20  
21  
22  
23  
24  
25  
26  
27  
28  
29  
30  
31  
32  
33  
34  
35  
36  
37  
38  
39  
40  
41  
42  
43  
44  
45  
46  
47  
48  
49  
50  
51  
52  
53  
54  
55  
56  
57  
58  
59  
60STROBE Statement—Checklist of items that should be included in reports of *cross-sectional studies*

|                              | Item No | Recommendation                                                                                                                                                                                    | Page Number        |
|------------------------------|---------|---------------------------------------------------------------------------------------------------------------------------------------------------------------------------------------------------|--------------------|
| <b>Title and abstract</b>    | 1       | (a) Indicate the study's design with a commonly used term in the title or the abstract                                                                                                            | 1                  |
|                              |         | (b) Provide in the abstract an informative and balanced summary of what was done and what was found                                                                                               | 2-3                |
| <b>Introduction</b>          |         |                                                                                                                                                                                                   |                    |
| Background/rationale         | 2       | Explain the scientific background and rationale for the investigation being reported                                                                                                              | 4                  |
| Objectives                   | 3       | State specific objectives, including any pre-specified hypotheses                                                                                                                                 | 5                  |
| <b>Methods</b>               |         |                                                                                                                                                                                                   |                    |
| Study design                 | 4       | Present key elements of study design early in the paper                                                                                                                                           | 5                  |
| Setting                      | 5       | Describe the setting, locations, and relevant dates, including periods of recruitment, exposure, follow-up, and data collection                                                                   | 5                  |
| Participants                 | 6       | (a) Give the eligibility criteria, and the sources and methods of selection of participants                                                                                                       | 5-6                |
| Variables                    | 7       | Clearly define all outcomes, exposures, predictors, potential confounders, and effect modifiers. Give diagnostic criteria, if applicable                                                          | 5-6                |
| Data sources/<br>measurement | 8*      | For each variable of interest, give sources of data and details of methods of assessment (measurement). Describe comparability of assessment methods if there is more than one group              | 7-8                |
| Bias                         | 9       | Describe any efforts to address potential sources of bias                                                                                                                                         | 25                 |
| Study size                   | 10      | Explain how the study size was arrived at                                                                                                                                                         | 6                  |
| Quantitative variables       | 11      | Explain how quantitative variables were handled in the analyses. If applicable, describe which groupings were chosen and why                                                                      | 11-13              |
| Statistical methods          | 12      | (a) Describe all statistical methods, including those used to control for confounding                                                                                                             | 11-13              |
|                              |         | (b) Describe any methods used to examine subgroups and interactions                                                                                                                               | Table 1, 2 & 3     |
|                              |         | (c) Explain how missing data were addressed                                                                                                                                                       | 12<br>reference 24 |
|                              |         | (d) If applicable, describe analytical methods taking account of sampling strategy                                                                                                                | 11-13              |
|                              |         | (e) Describe any sensitivity analyses                                                                                                                                                             | NA                 |
| <b>Results</b>               |         |                                                                                                                                                                                                   |                    |
| Participants                 | 13*     | (a) Report numbers of individuals at each stage of study—eg numbers potentially eligible, examined for eligibility, confirmed eligible, included in the study, completing follow-up, and analysed | 14                 |
|                              |         | (b) Give reasons for non-participation at each stage                                                                                                                                              | Figure 1           |
|                              |         | (c) Consider use of a flow diagram                                                                                                                                                                | Figure 1           |
| Descriptive data             | 14*     | (a) Give characteristics of study participants (eg demographic, clinical, social) and information on exposures and potential confounders                                                          | 14-15<br>Table 1   |
|                              |         | (b) Indicate number of participants with missing data for each variable of interest                                                                                                               | Figure 1           |

|                          |     |                                                                                                                                                                                                              |                                    |
|--------------------------|-----|--------------------------------------------------------------------------------------------------------------------------------------------------------------------------------------------------------------|------------------------------------|
| Outcome data             | 15* | Report numbers of outcome events or summary measures                                                                                                                                                         |                                    |
| Main results             | 16  | (a) Give unadjusted estimates and, if applicable, confounder-adjusted estimates and their precision (eg, 95% confidence interval). Make clear which confounders were adjusted for and why they were included | Table 3<br>(adjusted odds ratio)   |
|                          |     | (b) Report category boundaries when continuous variables were categorized                                                                                                                                    | Table 3                            |
|                          |     | (c) If relevant, consider translating estimates of relative risk into absolute risk for a meaningful time period                                                                                             | NA<br>(calculated only odds ratio) |
| Other analyses           | 17  | Report other analyses done—eg analyses of subgroups and interactions, and sensitivity analyses                                                                                                               | Table 3                            |
| <b>Discussion</b>        |     |                                                                                                                                                                                                              |                                    |
| Key results              | 18  | Summarise key results with reference to study objectives                                                                                                                                                     | 21-23                              |
| Limitations              | 19  | Discuss limitations of the study, taking into account sources of potential bias or imprecision. Discuss both direction and magnitude of any potential bias                                                   | 25-26                              |
| Interpretation           | 20  | Give a cautious overall interpretation of results considering objectives, limitations, multiplicity of analyses, results from similar studies, and other relevant evidence                                   | 21-23                              |
| Generalisability         | 21  | Discuss the generalisability (external validity) of the study results                                                                                                                                        | 21                                 |
| <b>Other information</b> |     |                                                                                                                                                                                                              |                                    |
| Funding                  | 22  | Give the source of funding and the role of the funders for the present study and, if applicable, for the original study on which the present article is based                                                | 27                                 |

\*Give information separately for exposed and unexposed groups.

**Note:** An Explanation and Elaboration article discusses each checklist item and gives methodological background and published examples of transparent reporting. The STROBE checklist is best used in conjunction with this article (freely available on the Web sites of PLoS Medicine at <http://www.plosmedicine.org/>, Annals of Internal Medicine at <http://www.annals.org/>, and Epidemiology at <http://www.epidem.com/>). Information on the STROBE Initiative is available at [www.strobe-statement.org](http://www.strobe-statement.org).

# BMJ Open

## Chest Radiograph Findings in children aged 2-59 months hospitalized with Community-Acquired Pneumonia, prior to the introduction of Pneumococcal Conjugate Vaccine in India- A Prospective Multisite Observational Study

|                                 |                                                                                                                                                                                                                                                                                                                                                                                                                                                                                                                                                                                                                                                                                                                                                                                                                                               |
|---------------------------------|-----------------------------------------------------------------------------------------------------------------------------------------------------------------------------------------------------------------------------------------------------------------------------------------------------------------------------------------------------------------------------------------------------------------------------------------------------------------------------------------------------------------------------------------------------------------------------------------------------------------------------------------------------------------------------------------------------------------------------------------------------------------------------------------------------------------------------------------------|
| Journal:                        | <i>BMJ Open</i>                                                                                                                                                                                                                                                                                                                                                                                                                                                                                                                                                                                                                                                                                                                                                                                                                               |
| Manuscript ID                   | bmjopen-2019-034066.R3                                                                                                                                                                                                                                                                                                                                                                                                                                                                                                                                                                                                                                                                                                                                                                                                                        |
| Article Type:                   | Original research                                                                                                                                                                                                                                                                                                                                                                                                                                                                                                                                                                                                                                                                                                                                                                                                                             |
| Date Submitted by the Author:   | 12-Apr-2020                                                                                                                                                                                                                                                                                                                                                                                                                                                                                                                                                                                                                                                                                                                                                                                                                                   |
| Complete List of Authors:       | Awasthi, Shally; King George's Medical University, Pediatrics<br>Rastogi, Tuhina; King George's Medical University, Paediatrics<br>Mishra, Neha; King George's Medical University, Pediatrics<br>Chauhan, Abhishek ; Dr Ram Manohar Lohia Institute of Medical Sciences, Department of Radio-diagnosis<br>Mohindra, Namita; Sanjay Gandhi Post Graduate Institute of Medical Sciences, Department of Radio-diagnosis<br>Shukla, Ram ; Banaras Hindu University, Varanasi, India, Institute of Medical Sciences<br>Agrawal, Monika; King George's Medical University, Community Medicine and Public Health<br>Pandey, CM; Sanjay Gandhi Post Graduate Institute of Medical Sciences, Biostatistics & Health Informatics<br>Kohli, Neera ; King George's Medical University, Department of Radio-diagnosis<br>Study Group, CAP; CAP study Group |
| <b>Primary Subject Heading</b>: | Paediatrics                                                                                                                                                                                                                                                                                                                                                                                                                                                                                                                                                                                                                                                                                                                                                                                                                                   |
| Secondary Subject Heading:      | Global health, Public health, Radiology and imaging                                                                                                                                                                                                                                                                                                                                                                                                                                                                                                                                                                                                                                                                                                                                                                                           |
| Keywords:                       | Chest radiographs, Hospitalized community-acquired pneumonia, under-five, Streptococcus pneumoniae, India                                                                                                                                                                                                                                                                                                                                                                                                                                                                                                                                                                                                                                                                                                                                     |
|                                 |                                                                                                                                                                                                                                                                                                                                                                                                                                                                                                                                                                                                                                                                                                                                                                                                                                               |

SCHOLARONE™  
Manuscripts



I, the Submitting Author has the right to grant and does grant on behalf of all authors of the Work (as defined in the below author licence), an exclusive licence and/or a non-exclusive licence for contributions from authors who are: i) UK Crown employees; ii) where BMJ has agreed a CC-BY licence shall apply, and/or iii) in accordance with the terms applicable for US Federal Government officers or employees acting as part of their official duties; on a worldwide, perpetual, irrevocable, royalty-free basis to BMJ Publishing Group Ltd ("BMJ") its licensees and where the relevant Journal is co-owned by BMJ to the co-owners of the Journal, to publish the Work in this journal and any other BMJ products and to exploit all rights, as set out in our [licence](#).

The Submitting Author accepts and understands that any supply made under these terms is made by BMJ to the Submitting Author unless you are acting as an employee on behalf of your employer or a postgraduate student of an affiliated institution which is paying any applicable article publishing charge ("APC") for Open Access articles. Where the Submitting Author wishes to make the Work available on an Open Access basis (and intends to pay the relevant APC), the terms of reuse of such Open Access shall be governed by a Creative Commons licence – details of these licences and which [Creative Commons](#) licence will apply to this Work are set out in our licence referred to above.

Other than as permitted in any relevant BMJ Author's Self Archiving Policies, I confirm this Work has not been accepted for publication elsewhere, is not being considered for publication elsewhere and does not duplicate material already published. I confirm all authors consent to publication of this Work and authorise the granting of this licence.

1  
2  
3  
4  
5  
6  
7  
8  
9  
10  
11  
12  
13  
14  
15  
16  
17  
18  
19  
20  
21  
22  
23  
24  
25  
26  
27  
28  
29  
30  
31  
32  
33  
34  
35  
36  
37  
38  
39  
40  
41  
42  
43  
44  
45  
46  
47  
48  
49  
50  
51  
52  
53  
54  
55  
56  
57  
58  
59  
60

**Title: *Chest Radiograph Findings in children aged 2-59 months hospitalized with Community-Acquired Pneumonia, prior to the introduction of Pneumococcal Conjugate Vaccine in India - A Prospective Multisite Observational Study***

**Short Title: *Radiological Findings in Children hospitalized with Community-Acquired Pneumonia in India Pre-Pneumococcal Conjugate Vaccine introduction***

**Shally Awasthi<sup>1\*</sup>, Tuhina Rastogi<sup>1</sup>, Neha Mishra<sup>1</sup>, Abhishek Chauhan<sup>2</sup>, Namita Mohindra<sup>3</sup>, Ram Chandra Shukla<sup>4</sup>, Monika Agarwal<sup>5</sup>, Chandra Mani Pandey<sup>6</sup>, Neera Kohli<sup>7</sup> and CAP Group<sup>^</sup>**

<sup>1</sup>Department of Pediatrics, King George's Medical University, Lucknow, India

<sup>2</sup>Department of Radio-diagnosis, Dr. Ram Manohar Lohia Institute of Medical Sciences, Lucknow, India

<sup>3</sup>Department of Radio-diagnosis, Sanjay Gandhi Post Graduate Institute of Medical Sciences, Lucknow, India

<sup>4</sup>Department of Radio-diagnosis, Institute of Medical Sciences, Banaras Hindu University, Varanasi, India

<sup>5</sup> Department of Community Medicine and Public Health, King George's Medical University, Lucknow, India

<sup>6</sup>Department of Biostatistics and Health Informatics, Sanjay Gandhi Postgraduate Institute of Medical Sciences, Lucknow, India

<sup>7</sup>Department of Radio-diagnosis, King George's Medical University, Lucknow, India

<sup>^</sup>Members of the Lucknow CAP Group are given in the Acknowledgement

\*Corresponding Author

Postal Address: Prof. Shally Awasthi, Head, Department of Pediatrics, King George's Medical University, Lucknow, India. Pincode: 226003

Mobile: +91-9839221244

E-mail: shally07@gmail.com

Word Count: 4808    Tables: 3    Figure: 1

## ABSTRACT

**Objectives:** The current study was a hospital-based surveillance of cases hospitalized with World Health Organization defined community-acquired pneumonia in children, aged 2-59 months, to assess the radiological abnormalities in chest X-rays and to identify the demographic and clinical correlates of specific radiological abnormalities, in residents of pre-specified districts of Uttar Pradesh and Bihar, India.

**Design:** Prospective, active, hospital-based surveillance.

**Setting:** Multisite study conducted in a network of 117 secondary/tertiary care hospitals in four districts of Uttar Pradesh and Bihar, India.

**Participants:** Included were children aged 2-59 months, hospitalized with community-acquired pneumonia, residing in the project district, with duration of illness <14 days and who had not been hospitalized elsewhere for this episode nor had been recruited previously.

**Main outcome measure:** Concordant radiological abnormalities in the chest X-rays.

**Results:** From January 2015 to April 2017, 3214 cases were recruited and in 99.40 % (3195/3214) chest X-rays were available, among which 88.54 % (2829/3195) were interpretable. Relevant radiological abnormalities were found in 34.53 % (977/ 2829, 95% C.I. 32.78 -36.28). These were primary end-point pneumonia alone or with other infiltrates in 22.44 % (635/2829, C.I. 20.90 %-23.98 %) and other infiltrates in 12.09% (342/ 2829; C.I. 10.88 %- 13.29 %). There was a statistically significant inter-district variation in radiological abnormalities. Statistically significantly higher proportion of abnormal chest X-ray were found in girls, those with weight-for-age z score  $\leq -3$  SD, longer duration of fever, pallor and with exposure to biomass fuel.

1  
2  
3 **Conclusions:** Among hospitalized cases of community-acquired pneumonia, almost one-third  
4 children had abnormal chest radiographs, which were higher in females, malnourished children  
5 and those with longer illnesses; and an intra-district variation was observed.  
6  
7  
8  
9

10  
11  
12 **Key words:** Chest radiographs, Hospitalized community-acquired pneumonia, under-five,  
13 *Streptococcus pneumoniae*, India  
14  
15  
16

## 17 **Strengths and Limitations of the Study**

- 18 • Prospective, multisite study recruiting cases from a large hospital surveillance network  
19 established for the project in four districts in two states of India that have high under-five  
20 mortality rates.  
21
- 22 • World Health Organization definition of clinical pneumonia was used for identifying  
23 hospitalized cases for generalizability.  
24
- 25 • Radiological abnormalities were interpreted by a panel of three independent, trained  
26 radiologists outside the surveillance network, blinded to each other as well as clinical features of  
27 the case.  
28
- 29 • Since pre-existing X-rays machines were used, there were variations in the quality of images,  
30 which was, however, minimized by digitizing them centrally.  
31
- 32 • Since data of clinical examination was abstracted from hospital records, inter-observer  
33 variation in documentation was possible.  
34  
35  
36  
37  
38  
39  
40  
41  
42  
43  
44  
45  
46  
47  
48  
49  
50  
51  
52  
53  
54  
55  
56  
57  
58  
59  
60

# 1 INTRODUCTION

2 Community-acquired pneumonia (CAP) is the leading cause of death in young children  
3 worldwide. Globally, pneumonia accounts for 16% of deaths in children under-five years of age,  
4 which translates into almost one million deaths annually, with 0.9 million deaths reported in  
5 2016.<sup>1 2</sup> Most deaths due to pneumonia occur in low and middle income countries, particularly  
6 in sub-Saharan Africa and South Asia.<sup>2 3</sup> In India, there were approximately 0.44 million under-  
7 five deaths due to CAP in the year 2015.<sup>4</sup>

8  
9 CAP could be of either viral or bacterial etiology.<sup>5-7</sup> In young children, bacteria associated with  
10 pneumonia are predominantly *Streptococcus pneumoniae* and *Hemophilus influenzae Type B*,  
11 while viruses are Respiratory Syncytial Virus and Influenza A or B.<sup>6</sup> However, etiology varies  
12 from country to country and also across different time periods. To reduce the incidence of  
13 bacterial pneumonia, vaccination against *Hemophilus influenzae Type B* is already under the  
14 national immunization programme of India since 2011. Thereafter, World Health Organization  
15 (WHO) introduced Pneumococcal Conjugate Vaccine (PCV) in countries, such as India, with  
16 high child mortality rates.<sup>8</sup> Consequently, PCV-13 was launched in May 2017 under the national  
17 immunization programme of five Indian states (Uttar Pradesh, Bihar, Rajasthan, Madhya Pradesh  
18 and Himachal Pradesh) in a phased manner.<sup>9</sup> It is expected to be rolled out in other parts of the  
19 country in the near future.

20  
21 Differentiating bacterial from viral etiology of CAP based on clinical features or investigations  
22 remains difficult.<sup>7 10 11</sup> Therefore, several PCV probe trials have used radiographically



1  
2  
3 23 confirmed end-point pneumonia to be a surrogate marker of bacterial etiology and hence used  
4  
5 24 this as an outcome measure for vaccine efficacy. This approach has been endorsed by WHO.<sup>12-14</sup>  
6  
7  
8  
9

10 26 The current study was conducted to assess the radiological abnormalities in chest X-rays (CXRs)  
11  
12 27 and to identify the demographic and clinical correlates of specific radiological abnormalities in  
13  
14 28 children aged 2-59 months, hospitalized with WHO defined CAP, residing in pre-specified  
15  
16  
17 29 districts of Uttar Pradesh and Bihar.  
18  
19  
20  
21  
22

## 23 31 **METHODS**

### 24 32 **Study design and Setting**

25  
26  
27  
28  
29 33 This was a prospective, multisite observational study conducted in the northern Indian states of  
30  
31 34 Uttar Pradesh and Bihar. Uttar Pradesh is the first most populated and Bihar third most populated  
32  
33 35 state of the country.<sup>15 16</sup> This study was conducted in Lucknow and Etawah districts of Uttar  
34  
35  
36 36 Pradesh and Patna and Darbhanga districts of Bihar, India. In Lucknow district 66.2% population  
37  
38 37 is urban and in Patna district 43.07%.<sup>15 16</sup> In contrast, only 22.3% population of Etawah district  
39  
40 38 and 9.74% population of Darbhanga district is urban.<sup>15 16</sup> All four project districts have high  
41  
42 39 infant and child mortality rates.<sup>15-17</sup> Infant mortality rate per 1000 live births of Lucknow district  
43  
44 40 is 44, Etawah district 56, Patna district 31 and Darbhanga district 44, all being higher than the  
45  
46 41 national average 41.<sup>15-17</sup> Similarly, under-five mortality rates per 1000 live births of districts  
47  
48 42 included in this study are above the national average 50, being 58 for Lucknow, 85 for Etawah,  
49  
50 43 46 for Patna and 77 for Darbhanga.<sup>15-17</sup>  
51  
52  
53  
54  
55  
56  
57  
58  
59  
60

## 45 Study Population

46 This study was conducted after obtaining institutional ethical clearance from all four  
47 participating academic institutions, one in each district. Each institution then established a  
48 prospective, active, hospital-based surveillance system for this study.<sup>17 18</sup> After obtaining written  
49 informed consent from the private hospital management and district administration for public  
50 hospitals, included in the surveillance were 117 public and private hospitals of four study  
51 districts which provided either secondary or tertiary level care to admitted children.

52 Surveillance officers of the project visited these hospitals every 48-72 hours to screen and  
53 recruit eligible cases. In between the scheduled visits they telephonically contacted the hospitals  
54 daily to inquire about hospitalization of any potentially eligible case and made additional visits,  
55 if required. All children between the ages of 2-59 months, hospitalized in network hospitals with  
56 history of fast breathing with/without chest in-drawing were screened.<sup>18</sup>

57  
58 Included were children hospitalized with symptoms of WHO defined CAP and residing in the  
59 project district.<sup>18</sup> WHO defined CAP was categorized into pneumonia and severe pneumonia.

60 Fast breathing  $\geq 50$  breaths/minute in a child aged 2–11 months and  $\geq 40$  breaths/minute in a  
61 child aged 12-59 months, with or without chest in-drawing was categorized as 'pneumonia'.<sup>19</sup>

62 Cough or difficulty in breathing plus at least one of the following: (a) oxygen saturation  $< 90\%$   
63 or central cyanosis or (b) severe respiratory distress (e.g. grunting, very severe chest in-drawing)  
64 or (c) signs of pneumonia with a general danger sign (inability to breastfeed or drink, lethargy or  
65 reduced level of consciousness, convulsions) was categorized as 'severe pneumonia'.<sup>19</sup> Excluded  
66 were children with cough for  $\geq 14$  days or those that had been hospitalized in last 14 days.<sup>18</sup>

67

## 68 **Sample Size**

69 We assumed that the incidence of radiological pneumonia is 3/100 child years of observations.  
70 Then for a margin of error of 1.5/100 child years of observation, incidence of pneumonia in the  
71 community of 20/100 child years of observation, alpha level of 0.05, and power of 90% when the  
72 estimated population of children under-five years of age in Lucknow district <sup>20</sup> is 750,000; 693  
73 cases had to be included per district.

## 75 **Data collection**

76 Data was collected by surveillance officers hired for the project at each of the four district sites.  
77 They had postgraduate degree in social sciences and at least 10 years experience in community  
78 based health research. After recruitment, they were imparted six-day centralized training on  
79 project procedures and logistics. Classroom as well as practical skills training in real life setting  
80 was given by the coordinating centre in Lucknow. Pre and post tests were conducted to ascertain  
81 knowledge. Skills acquired by them were assessed during field observations. The coordinating  
82 centre provided annual refresher training to the surveillance officers from all four district sites in  
83 Lucknow. This was done to ensure quality of data collected.

84 After obtaining written, informed consent of the caregivers, data was collected through face-to-  
85 face interviews with caregivers, as well as by abstraction from hospital records. Socio-  
86 demographic data obtained by interviewing caregivers was: child's age, gender, residence, birth  
87 order, immunization status, current breastfeeding status, parental education and occupation,  
88 smoking status of parents, family type, housing infrastructure, use of biomass fuel etc.  
89 Caregivers were also asked about the symptoms of disease and its duration in days.

90  
91 Clinical data, recorded by pre-existing hospital staff at the time of hospitalization, was abstracted  
92 by surveillance officers. Data was collected on anthropometry (weight and height), fever  
93 (axillary temperature  $\geq 37.5^{\circ}\text{C}$ ), oxygen saturation by pulse oxymetry where done, pallor, central  
94 cyanosis, signs of pneumonia along with general danger sign and vital signs (heart rate and  
95 respiratory rate). Presence of auscultatory wheeze was abstracted or inquired from the treating  
96 clinician. In case information on a clinical variable was missing in the medical chart, the  
97 surveillance officers contacted the clinician and obtained the same. Thus, there was no missing  
98 data for clinical variables reported in this manuscript.

99  
100 At the hospitals, clinicians generally used Integrated Management of Childhood Illness  
101 definitions<sup>21</sup> to identify pallor, cyanosis, wheeze on auscultation and general danger sign as it is  
102 incorporated in their medical undergraduate training. Most clinicians of public health sector had  
103 also received a formal in-service training on Integrated Management of Childhood Illness.<sup>21</sup>  
104 Clinical outcome (survival or mortality) was noted from the hospital records on follow up.<sup>17 18</sup>

### 106 **Chest x-ray (CXR) image acquisition and archiving**

107 CXR (poster-anterior view) was done on the advice of treating physician. These CXRs were  
108 obtained by the surveillance officers at the time of recruitment. CXRs were either analog or  
109 digital. In case of digital CXRs, second copy was obtained where possible. If only single analog  
110 image was available, then the hardcopy of CXR was obtained from the caregiver after the child  
111 was discharged. If the caregiver was not ready to give the hardcopy of CXR (in <1% cases),

1  
2  
3 112 image of the same was captured by surveillance officers using 16 megapixel cell phone camera  
4  
5 113 and portable CXR view-box.  
6  
7

8 114  
9  
10 115 CXRs of recruited cases were subsequently scanned and converted into digital format using a  
11  
12 116 diagnostic quality film image digitizer (Microteck International Limited<sup>®</sup>, Medi 6000 plus).<sup>22</sup>  
13  
14 117 These were archived for web-based radiological interpretation. Digital images were stored in  
15  
16 118 JPEG format at 300 dpi resolution. Each CXR file was anonymized and given a unique  
17  
18 119 identification number. Digital CXRs were uploaded on customized online data management  
19  
20 120 software.  
21  
22  
23

24 121

## 26 122 **Interpretation of radiological images**

27  
28  
29 123 A panel of radiologists was constituted for standardized interpretations of CXRs. Four  
30  
31 124 radiologists were part of this panel, one of whom was Project co-investigator-Radiology (NK).  
32  
33 125 All radiologists are faculty in medical teaching institutes and also look after pediatric radiology.  
34  
35 126 They have more than fifteen years experience in interpreting pediatric CXRs.  
36  
37

38 127

39  
40  
41 128 Radiologists were trained according to the methodology developed by Department of  
42  
43 129 Immunization, Vaccines and Biologicals of the WHO for research purpose.<sup>11</sup> An international  
44  
45 130 WHO-certified trainer from the International Centre for Diarrhoeal Disease Research,  
46  
47 131 Bangladesh imparted two-day in-house training to the radiologists. The objectives of this training  
48  
49 132 were to standardize interpretation and coding of CXRs, to develop a CXR reporting form [**S1**  
50  
51 133 **Appendix**] and to provide training on web-based CXR retrieval and reporting system. During the  
52  
53 134 training, 210 CXRs of the WHO data set were used. For assessing post training concordance,  
54  
55  
56  
57  
58  
59  
60

1  
2  
3 135 another set of 48 CXRs was provided for interpretation to individual radiologists. Post-test  
4  
5 136 agreement with WHO findings was about 80%. Inter-observer variation was about 25% and was  
6  
7 137 for only minor interpretations such as quality of film, end-point infiltrates etc. Repeat training  
8  
9 138 was conducted on an additional set of 44 CXRs provided by the WHO to ensure standardization  
10  
11 139 in interpretation. Thereafter, concordance achieved by the radiologists was reviewed quarterly by  
12  
13 140 the study arbitrator. Radiologists met annually to review key concepts and discuss challenges  
14  
15 141 faced in interpreting CXRs.  
16  
17  
18  
19 142

20  
21 143 After training, radiologists independently reviewed CXRs and registered their findings in an  
22  
23 144 online standardized chest radiograph interpretation form [S1 Appendix]. For optimal viewing of  
24  
25 145 CXRs, all radiologists used similar workstations. Specifications were provided for the computer  
26  
27 146 monitor and hardware to be used. It was ensured that computer monitors had the correct  
28  
29 147 brightness and contrast adjustment for optimal viewing.  
30  
31  
32

33 148  
34  
35 149 During online evaluation, radiologists reported the quality of film as *'interpretable'* or *'un-*  
36  
37 150 *'interpretable'*. Further, they categorized *'interpretable'* CXRs as either *'adequate/optimal'*  
38  
39 151 which allowed for confident interpretation of consolidation and pleural effusion as well as other  
40  
41 152 infiltrates or *'suboptimal'* which allowed interpretation of only consolidation and pleural  
42  
43 153 effusion, but not of other infiltrates. In *'un-interpretable'* CXRs, no comment was possible for  
44  
45 154 radiological abnormality such as consolidation, pleural effusion or other infiltrates.<sup>12</sup>  
46  
47  
48

49 155  
50  
51 156 After interpreting film quality, radiologists evaluated interpretable CXRs for abnormal  
52  
53 157 radiological findings. For each CXR evaluated, radiological abnormality could be presence of  
54  
55  
56  
57  
58  
59  
60

1  
2  
3 158 consolidation, other infiltrates or pleural effusion. *Consolidation* was defined as a dense or  
4  
5 159 confluent opacity that occupied a portion or whole of a lobe or the entire lung that may or may  
6  
7  
8 160 not contain air bronchograms. *Other infiltrates* were defined as linear and patchy opacities  
9  
10 161 (interstitial infiltrate) in a lacy pattern, featuring peri-bronchial thickening and multiple areas of  
11  
12 162 atelectasis, also including minor patchy infiltrates that were not of sufficient magnitude to  
13  
14 163 constitute end-point consolidation, and small areas of atelectasis which may be difficult to  
15  
16 164 distinguish from consolidation. *Pleural effusion* was defined as the fluid in the lateral pleural  
17  
18 165 space between the lung and chest wall that was spatially associated with a pulmonary  
19  
20 166 parenchymal infiltrate (including *other infiltrates*) or had obliterated enough of the hemithorax  
21  
22 167 to obscure any infiltrates. In most cases, this was to be seen at the costo-phrenic angle or as a  
23  
24 168 layer of fluid adjacent to the lateral chest-wall and this does not include fluid seen in the  
25  
26 169 horizontal or oblique fissures.<sup>12</sup> Primary end-point pneumonia (PEP) for research purpose was  
27  
28 170 the presence of consolidation or pleural effusion which could be with or without other infiltrates.  
29  
30  
31 171  
32  
33  
34  
35 172 Final conclusions were categorised as: (a) *Abnormal* when it was *PEP only* or *other*  
36  
37 173 *infiltrates only* or *Both PEP and other infiltrates* and (b) *Normal* when no abnormal findings  
38  
39 174 were seen.<sup>12</sup>  
40  
41  
42  
43  
44  
45  
46  
47  
48  
49  
50  
51  
52  
53  
54  
55  
56  
57  
58  
59  
60

176 Data manager checked for inconsistencies and completeness after online evaluation of CXRs by  
177 individual radiologists. Thereafter, CXRs with concordant and discordant interpretations were  
178 identified. Interpretations were considered concordant when there was an agreement between  
179 two or more radiologists on final conclusions and discordant if all the three radiologists

1  
2  
3 180 disagreed. Discordant interpretations were forwarded to the study arbitrator (NK). Arbitrator  
4  
5 181 assessed discordant CXRs online and her interpretation was taken as final.  
6  
7

8 182

### 10 183 **Data management and statistical analysis**

12 184 Clinical data of hospital surveillance network was entered online in customized software.  
14  
15 185 Primary entry was done by the four participating sites. Secondary data entry was done by the  
16  
17 186 coordinating site in separate customized software. Anonymized CXRs were uploaded on  
18  
19 187 customized software. Each of the three panelists assessed the CXRs online, blind to peer  
20  
21 188 assessments as well as clinical features of the case. CXR assessment data was downloaded from  
22  
23 189 the online software in MS Access database.  
24  
25  
26

27 190

28  
29 191 Exploratory data analysis was performed for detection of outlier and missing observations for all  
30  
31 192 the variables. Un-interpretable CXRs were not analyzed. Among interpretable CXRs, concordant  
32  
33 193 radiological abnormalities were taken as final. Weight-for-age (WAZ) z-score each child was  
34  
35 194 calculated using WHO Anthro Survey Analyser.<sup>23</sup> Weight of 7.59% (215/2829) children was  
36  
37 195 missing. Missing weight was estimated using regression based imputation technique.<sup>24</sup> Kappa  
38  
39 196 statistics was performed for agreement analysis among radiologists for CXRs findings. Statistical  
40  
41 197 analysis was performed using SPSS version 22.0 (Chicago, IL).<sup>25</sup> A p-value of <0.05 was taken  
42  
43 198 as statistically significant using a two-tailed distribution.  
44  
45  
46

47  
48 199

49  
50 200 Univariate analysis was performed to evaluate heterogeneity, stratified by four participating  
51  
52 201 districts for socio-demographic variables such as child's age, gender, residence, birth order,  
53  
54 202 immunization status, current breastfeeding status, parental education and occupation, smoking  
55  
56  
57



1  
2  
3 203 status of parents, family type, housing infrastructure, use of biomass fuel and for clinical  
4  
5 204 variables such as weight, height, duration of fever and oxygen saturation.  
6  
7

8 205  
9  
10 206 We report proportions of radiological abnormalities among children hospitalized for CAP by  
11  
12 207 four districts. Univariate analysis was performed to assess association of socio-demographic  
13  
14 208 variables and clinical signs of CAP with radiological abnormalities. Chi-square test was used for  
15  
16 209 categorical variables and student's t-test for continuous variables. ANOVA was used to test the  
17  
18 210 significance of continuous variables when there were more than two groups. Multivariate  
19  
20 211 unconditional logistic regression was performed to find association of presence of various  
21  
22 212 radiological abnormalities with other variables that had univariate association with radiological  
23  
24 213 abnormalities ( $p$  value  $\leq 0.2$ ) and/or were clinically meaningful, controlling for district of  
25  
26 214 residence.  
27  
28  
29

30 215  
31  
32  
33 216 We developed four models in which the dependent (outcome) were different CXR findings and  
34  
35 217 these were as follows:  
36

37  
38 218 Model I: Abnormal versus Normal

39  
40 219 Model II: Primary End-Point Pneumonia alone or with Other Infiltrates versus Normal

41  
42 220 Model III: Primary End-Point Pneumonia alone versus Normal

43  
44 221 Model IV: Other Infiltrates only versus Normal  
45  
46

47 222  
48  
49 223 Independent variables were the same in all the four models. These were participating districts,  
50  
51 224 age, gender, use of biomass fuel, symptoms of CAP such as duration of illness, presence of  
52  
53  
54  
55  
56  
57

225 wheeze on auscultation, pallor, vomiting everything and malnutrition status of the case [ $WAZ \leq -$   
226 2 SD (malnourished) and  $WAZ \leq -3$  SD (severely malnourished)].

227

## 228 **Patient and public involvement in research**

229 Patients or public were not involved in the development of research question, study design or  
230 conducting the research. Reporting of this research conforms to the guidelines for Strengthening  
231 the Reporting of Observational Studies in Epidemiology (STROBE)<sup>26</sup>.

232

## 233 **RESULTS**

234 From January 2015 to April 2017, 3290 cases were screened in hospital surveillance network of  
235 four districts. Out of these, 3214 were eligible and consenting for inclusion [**Figure 1**]. Among  
236 them, in 3195 (99.40%) CXR was done and only in 19 (1.0%) cases CXR not done. However,  
237 only 88.54% (2829/3195) CXRs were interpretable and remaining 11.45% (366/3195) were un-  
238 interpretable. In cases with interpretable CXRs, 99.11 % (2804/2829) had `severe pneumonia` as  
239 per the WHO criteria<sup>19</sup>.

240

241 Concordance among  $\geq 2$  radiologists on final conclusion of CXRs findings was 86.0%. Kappa  
242 statistics was calculated for agreement of CXRs findings between Reader 1 versus Reader 2  
243 ( $K_1=0.31$ ), Reader 2 versus Reader 3 ( $K_2=0.46$ ) and Reader 3 versus Reader 1 ( $K_3=0.42$ ). Among  
244 interpretable CXRs, 22.44% (635/2829) cases had PEP alone or with other infiltrates, 12.09%  
245 (342/2829) had other infiltrates only and 65.46% (1852/2829) were normal [**figure 1**].

246

247 **Table 1** shows univariate distribution of socio-demographic and clinical variables among  
 248 hospitalized cases across participating districts. A variation was observed in socio-demographic  
 249 variables such as place of residence, type of house, type of family, maternal and paternal  
 250 education and occupation, use of biomass fuel and parental smoking status across the four  
 251 districts. We also report clinical variables of recruited cases across the four districts in **table 1**.  
 252 Among those where pulse-oximetry was done, the proportion of cases with oxygen saturation <  
 253 90 % was found to be different across four districts.

254

255 **Table 1: Distribution of socio-demographic and clinical variables among hospitalized children for**  
 256 **participating districts (January 2015-April 2017)**

| Characteristics                          | Lucknow       | Etawah       | Patna        | Darbhanga    | Total         |
|------------------------------------------|---------------|--------------|--------------|--------------|---------------|
| <b>Socio-demographic Characteristics</b> | <b>n=1025</b> | <b>n=389</b> | <b>n=744</b> | <b>n=671</b> | <b>N=2829</b> |
|                                          | (%)           | (%)          | (%)          | (%)          | (%)           |
| <b>Gender</b>                            |               |              |              |              |               |
| Male                                     | 659(64.29)    | 287(73.78)   | 557(74.87)   | 502(74.81)   | 2005(70.87)   |
| <b>Place of residence</b>                |               |              |              |              |               |
| Rural                                    | 195(19.02)    | 279(71.72)   | 304(40.86)   | 614(91.51)   | 1392(49.20)   |
| Urban                                    | 830(80.98)    | 110(28.28)   | 440(59.14)   | 57(8.49)     | 1437(50.80)   |
| <b>Family Type</b>                       |               |              |              |              |               |
| Joint                                    | 688(67.12)    | 360(92.54)   | 707(95.03)   | 383(57.08)   | 2138(75.57)   |
| Nuclear                                  | 337(32.88)    | 29(7.46)     | 37(4.97)     | 287(42.77)   | 690(24.39)    |
| <b>House type</b>                        |               |              |              |              |               |
| Mud                                      | 64(6.24)      | 54(13.88)    | 123(16.53)   | 374(55.74)   | 615(21.74)    |
| Bricks                                   | 854(83.32)    | 256(65.81)   | 453(60.89)   | 85(12.67)    | 1648(58.25)   |
| Combined                                 | 107(10.4)     | 79(20.31)    | 168(22.58)   | 212(31.59)   | 566(20.01)    |
| <b>Mother's Education</b>                |               |              |              |              |               |
| No formal education                      | 203(19.80)    | 56(14.40)    | 328(44.09)   | 496(73.92)   | 1083(38.28)   |
| Class I-V                                | 108(10.54)    | 28(7.20)     | 82(11.02)    | 38(5.66)     | 256(9.05)     |
| Class VI-XII                             | 379(36.98)    | 176(45.24)   | 243(33.66)   | 112(16.69)   | 910(32.17)    |
| Graduate/ Post graduation                | 335(32.68)    | 129(33.16)   | 91(12.23)    | 25(3.73)     | 580(20.50)    |
| <b>Father's Education</b>                |               |              |              |              |               |
| No formal education                      | 167(16.29)    | 29(7.46)     | 153(20.56)   | 345(51.42)   | 694(24.53)    |
| Class I-V                                | 85(8.29)      | 19(4.88)     | 91(12.23)    | 82(12.22)    | 277(9.79)     |
| Class VI-XII                             | 437(42.63)    | 206(52.96)   | 328(44.09)   | 205(30.55)   | 1176(41.57)   |
| Graduate/ Post graduation                | 336(32.78)    | 135(34.70)   | 172(23.12)   | 39(5.81)     | 682(24.11)    |

|                                       |            |            |            |            |             |
|---------------------------------------|------------|------------|------------|------------|-------------|
| <b>Birth Order</b>                    |            |            |            |            |             |
| 1 <sup>st</sup>                       | 435(42.44) | 187(48.07) | 315(42.34) | 192(28.61) | 1129(39.91) |
| 2 <sup>nd</sup>                       | 343(33.46) | 120(30.85) | 235(31.59) | 258(38.45) | 956(33.79)  |
| 3 <sup>rd</sup>                       | 153(14.93) | 47(12.08)  | 129(17.34) | 137(20.42) | 466(16.47)  |
| More than 3 <sup>rd</sup>             | 93(9.07)   | 35(9.00)   | 62(8.33)   | 83(12.37)  | 273(9.65)   |
| <b>Immunization Status</b>            |            |            |            |            |             |
| Complete for age                      | 792(77.27) | 300(77.12) | 711(95.56) | 544(81.07) | 2347(82.96) |
| Incomplete for age                    | 220(21.46) | 84(21.59)  | 25(3.36)   | 126(18.78) | 455(16.08)  |
| Unimmunized                           | 13(1.27)   | 5(1.29)    | 8(1.08)    | 1(0.15)    | 27(0.95)    |
| <b>Currently Breast Feeding</b>       |            |            |            |            |             |
| Yes                                   | 653(63.71) | 256(65.81) | 589(79.17) | 537(80.03) | 2035(71.93) |
| No                                    | 372(36.29) | 133(34.19) | 155(20.83) | 134(19.97) | 794(28.07)  |
| <b>Father's Occupation</b>            |            |            |            |            |             |
| Unemployed                            | 13(1.27)   | 20(5.14)   | 27(3.63)   | 63(9.39)   | 123(4.35)   |
| Daily wages                           | 329(32.10) | 81(20.82)  | 165(22.18) | 474(70.64) | 1049(37.08) |
| Salaried/ Professional                | 397(38.73) | 104(26.74) | 245(32.93) | 55(8.20)   | 801(28.31)  |
| Self-Employment                       | 286(27.90) | 184(47.30) | 307(41.26) | 79(11.77)  | 856(30.26)  |
| <b>Mother's Occupation</b>            |            |            |            |            |             |
| Home maker                            | 961(93.76) | 376(96.66) | 701(94.22) | 484(72.13) | 2522(89.15) |
| Daily wages                           | 17(1.66)   | 3(0.77)    | 17(2.28)   | 171(25.48) | 208(7.35)   |
| Salaried/Professional                 | 47(4.59)   | 9(2.31)    | 18(2.42)   | 7(1.04)    | 81(2.86)    |
| Self-Employment                       | 0(0.0)     | 1(0.26)    | 8(1.08)    | 9(1.34)    | 18(0.64)    |
| <b>Biomass fuel</b>                   |            |            |            |            |             |
| Yes                                   | 211(20.59) | 245(62.98) | 263(35.35) | 609(90.76) | 1328(46.94) |
| No                                    | 814(79.41) | 144(37.02) | 481(64.65) | 62(9.24)   | 1501(53.06) |
| <b>Smoking Status-Father</b>          |            |            |            |            |             |
| Yes                                   | 152(14.83) | 45(11.57)  | 56(7.53)   | 59(8.79)   | 312(11.03)  |
| No                                    | 873(85.17) | 344(88.43) | 688(92.47) | 612(91.21) | 2517(88.97) |
| <b>Indoor smoking-Father</b>          |            |            |            |            |             |
| Yes                                   | 83(8.10)   | 21(5.40)   | 16(2.15)   | 43(6.41)   | 163(5.76)   |
| No                                    | 942(91.90) | 368(91.60) | 728(97.85) | 628(93.59) | 2666(94.24) |
| <b>Smoking Status-Family member</b>   |            |            |            |            |             |
| Yes                                   | 129(12.59) | 55(14.14)  | 45(6.05)   | 102(15.20) | 331(11.70)  |
| No                                    | 896(87.41) | 334(85.86) | 699(93.95) | 569(84.80) | 2498(83.30) |
| <b>Indoor smoking – Family member</b> |            |            |            |            |             |
| Yes                                   | 84(8.20)   | 27(6.94)   | 27(3.63)   | 94(14.01)  | 232(8.20)   |
| No                                    | 941(91.80) | 362(93.06) | 717(96.37) | 577(85.99) | 2597(91.80) |
| <b>Clinical Variables at</b>          | <b>n</b>   | <b>n</b>   | <b>n</b>   | <b>n</b>   | <b>n</b>    |

| the time of admission at hospital                    | Mean± SD            | Mean± SD           | Mean± SD           | Mean± SD           | Mean± SD            |
|------------------------------------------------------|---------------------|--------------------|--------------------|--------------------|---------------------|
| Age (months)                                         | 1025<br>14.53±13.88 | 389<br>10.69±10.95 | 744<br>10.26±11.35 | 671<br>12.30±13.29 | 2829<br>12.35±12.85 |
| Height (cm)                                          | 303<br>68.61±13.78  | 324<br>70.66±13.75 | 34<br>64.38±10.25  | 266<br>70.46±12.14 | 927<br>69.70±13.26  |
| Weight (kg)                                          | 1025<br>7.96±2.97   | 389<br>7.34±2.73   | 744<br>7.11±2.78   | 671<br>7.78±2.93   | 2829<br>7.61±2.90   |
| Fever Duration (days)                                | 929<br>4.46±2.71    | 321<br>3.59±2.37   | 689<br>4.25±2.52   | 569<br>3.54±2.47   | 2508<br>4.08±2.59   |
| <b>Respiratory Rate</b>                              |                     |                    |                    |                    |                     |
| Respiratory Rate (2-11 months)                       | 602<br>53.38±14.05  | 272<br>60.87±9.60  | 540<br>53.82±10.16 | 451<br>60.78±7.26  | 1864<br>56.37±11.49 |
| Respiratory Rate (12-59 months)                      | 423<br>47.75±14.17  | 117<br>53.22±13.17 | 204<br>45.59±10.11 | 220<br>58.03±6.83  | 964<br>50.30±12.76  |
| Oxygen saturation done (n, %)                        | 528 (51.51)         | 343 (88.17)        | 236 (34.25)        | 319 (56.06)        | 1426 (50.40)        |
| Oxygen saturation < 90% (n, %)                       | 61(11.53)           | 57(16.61)          | 49 (20.76)         | 43(13.47)          | 210 (14.72)         |
| Grunting (n, %)                                      | 461(44.98)          | 353 (90.75)        | 687 (92.34)        | 649 (96.72)        | 2150 (76.00)        |
| Very severe chest in-drawing (n, %)                  | 953 (92.97)         | 352 (90.49)        | 739 (99.33)        | 651 (97.02)        | 2695 (95.26)        |
| <b>Signs of Pneumonia with a general danger sign</b> |                     |                    |                    |                    |                     |
| Lethargy or reduced level of consciousness (n, %)    | 423 (41.27)         | 259 (66.58)        | 6 (0.81)           | 412 (61.40)        | 1100(38.88)         |
| Inability to breastfeed or drink (n, %)              | 291(28.39)          | 259 (66.58)        | 75 (10.08)         | 312 (46.50)        | 937(33.12)          |
| Convulsions (n, %)                                   | 16 (1.56)           | 19 (4.58)          | 13 (1.75)          | 100 (14.90)        | 148(5.23)           |
| Central cyanosis (n,%)                               | 15 (1.46)           | 7 (1.80)           | 26 (3.49)          | 14 (2.09)          | 62 (2.19)           |

257

258 Among those with interpretable CXRs, 34.5% (977/2829) had radiological abnormalities, which  
 259 were PEP alone or with other infiltrates in 64.9% (635/977) and other infiltrates in 35.1%  
 260 (342/977) (**table 2**). In the same table, we report these findings by district as well as socio-  
 261 demographical and clinical associates of normal versus abnormal CXR as well among those with  
 262 abnormal CXRs, in those with PEP alone or with other infiltrates versus other infiltrates only.

263

264 We observed statistically significant district-wise heterogeneity in radiological abnormalities

265 (**table 2**). We found higher proportion of radiological abnormalities as well as PEP alone or with

266 other infiltrates in Patna and Lucknow districts, and lower proportion in Etawah and Darbhanga

267 districts. Statistically significant higher proportion of females hospitalized for CAP had

268 radiologically abnormal CXR (**table 2**). Likewise, statistically significantly higher proportion of

269 abnormal CXR findings were reported in hospitalized cases who had symptoms of fever, pallor,

270 wheezing on auscultation, vomiting everything or were malnourished (**table 2**). Among cases

271 with abnormal CXRs, statistically significantly higher proportion of cases with other infiltrates

272 had wheezing on auscultation.

273

274 **Table 2: Distribution of socio-demographic and clinical factors by chest radiograph**

275 **findings among hospitalized children from January 2015-April 2017**

|                                                               | Interpretable chest X rays |                         |                          | Abnormal chest X rays |                                                            |                                      |         |
|---------------------------------------------------------------|----------------------------|-------------------------|--------------------------|-----------------------|------------------------------------------------------------|--------------------------------------|---------|
|                                                               | N=2829                     | Normal<br>1852<br>n (%) | Abnormal<br>977<br>n (%) | p value               | PEP* alone or<br>with other<br>infiltrates<br>635<br>n (%) | Other<br>infiltrates<br>342<br>n (%) | p value |
| <b>Participating site</b><br>(row %)                          |                            |                         |                          |                       |                                                            |                                      |         |
| Lucknow                                                       | 1025                       | 636<br>(62.05)          | 389<br>(37.95)           | <0.0001               | 282<br>(72.49)                                             | 107<br>(27.51)                       | <0.0001 |
| Etawah                                                        | 389                        | 275<br>(70.69)          | 114<br>(29.31)           |                       | 73<br>(64.04)                                              | 41<br>(35.96)                        |         |
| Patna                                                         | 744                        | 457<br>(61.42)          | 287<br>(38.58)           |                       | 184<br>(64.11)                                             | 103<br>(35.89)                       |         |
| Darbhangha                                                    | 671                        | 484<br>(72.13)          | 187<br>(27.87)           |                       | 96<br>(51.34)                                              | 91<br>(48.66)                        |         |
| <b>Socio-demographic &amp; clinical factors</b><br>(column %) |                            |                         |                          |                       |                                                            |                                      |         |

1  
2  
3  
4  
5  
6  
7  
8  
9  
10  
11  
12  
13  
14  
15  
16  
17  
18  
19  
20  
21  
22  
23  
24  
25  
26  
27  
28  
29  
30  
31  
32  
33  
34  
35  
36  
37  
38  
39  
40  
41  
42  
43  
44  
45  
46  
47  
48  
49  
50  
51  
52  
53  
54  
55  
56  
57  
58  
59  
60

|                                                 |      |                     |                    |         |                    |                    |                |
|-------------------------------------------------|------|---------------------|--------------------|---------|--------------------|--------------------|----------------|
| <b>Age-group (months)</b>                       |      |                     |                    |         |                    |                    |                |
| 2-11                                            | 1865 | 1223<br>(66.04)     | 642<br>(65.71)     | 0.86    | 409<br>(64.41)     | 233<br>(68.13)     | 0.26           |
| 12-59                                           | 964  | 629<br>(33.96)      | 335<br>(34.29)     |         | 226<br>(35.59)     | 109<br>(31.87)     |                |
| <b>Gender</b>                                   |      |                     |                    |         |                    |                    |                |
| Male                                            | 2005 | 1354<br>(73.11)     | 651<br>(66.63)     | <0.0001 | 426<br>(67.09)     | 225<br>(65.79)     | 0.72           |
| Female                                          | 824  | 498<br>(26.89)      | 326<br>(33.37)     |         | 209<br>(32.91)     | 117<br>(34.21)     |                |
| <b>Place of residence</b>                       |      |                     |                    |         |                    |                    |                |
| Rural                                           | 1392 | 921<br>(49.73)      | 471<br>(48.21)     | 0.44    | 299<br>(47.09)     | 172<br>(50.29)     | 0.34           |
| Urban                                           | 1437 | 931<br>(50.27)      | 506<br>(51.79)     |         | 336<br>(52.91)     | 170<br>(49.71)     |                |
| <b>Biomass fuel</b>                             |      |                     |                    |         |                    |                    |                |
| Yes                                             | 1501 | 867<br>(46.81)      | 461<br>(47.19)     | 0.44    | 294<br>(42.30)     | 167<br>(48.83)     | 0.24           |
| No                                              | 1328 | 985<br>(53.19)      | 516<br>(52.81)     |         |                    | 341<br>(53.70)     | 175<br>(51.17) |
| <b>Immunization status</b>                      |      |                     |                    |         |                    |                    |                |
| Complete for age                                | 2347 | 1546<br>(83.48)     | 801<br>(81.99)     | 0.32    | 516<br>(81.26)     | 285<br>(83.33)     | 0.54           |
| Incomplete                                      | 482  | 306<br>(16.52)      | 176<br>(18.01)     |         |                    | 119<br>(18.74)     |                |
| <b>Clinical Features</b>                        |      |                     |                    |         |                    |                    |                |
| Fever                                           | 2499 | 1616<br>(87.26)     | 883<br>(90.38)     | 0.014   | 575<br>(90.55)     | 308<br>(90.06)     | 0.82           |
| Pallor                                          | 764  | 465<br>(25.11)      | 299<br>(30.60)     | 0.002   | 200<br>(31.50)     | 99<br>(28.95)      | 0.41           |
| Wheeze on auscultation                          | 2054 | 1377<br>(74.35)     | 677<br>(69.29)     | 0.005   | 415<br>(65.35)     | 262<br>(76.61)     | 0.0003         |
| Duration of illness fever [days] (n, Mean ± SD) | 2499 | 1611<br>3.91±2.51   | 888,<br>4.40±2.70  | <0.0001 | 577,<br>4.57±2.82  | 342,<br>4.08±2.44  | 0.011          |
| <b>Respiratory Rate</b>                         |      |                     |                    |         |                    |                    |                |
| Respiratory Rate [2-11 months] (n, Mean ± SD)   | 1865 | 1243<br>55.52±11.29 | 642<br>57.99±11.70 | <0.0001 | 409<br>58.12±11.88 | 233<br>57.74±11.40 | 0.69           |
| Respiratory Rate [12-59 months] (n, Mean ± SD)  | 964  | 629<br>49.78±12.41  | 335<br>51.28±13.37 | 0.08    | 226<br>51.35±13.31 | 109<br>51.12±13.35 | 0.88           |
| Fast Breathing for                              | 1735 | 1130                | 605                | 0.11    | 384                | 221                | 0.69           |

1  
2  
3  
4  
5  
6  
7  
8  
9  
10  
11  
12  
13  
14  
15  
16  
17  
18  
19  
20  
21  
22  
23  
24  
25  
26  
27  
28  
29  
30  
31  
32  
33  
34  
35  
36  
37  
38  
39  
40  
41  
42  
43  
44  
45  
46  
47  
48  
49  
50  
51  
52  
53  
54  
55  
56  
57  
58  
59  
60

|                                                            |      |                 |                |          |                |                |      |
|------------------------------------------------------------|------|-----------------|----------------|----------|----------------|----------------|------|
| age [2-11 months]                                          |      | (61.02)         | (61.92)        |          | (60.47)        | (64.62)        |      |
| Fast Breathing for age [12-59 months]                      | 862  | 562<br>(30.35)  | 300<br>(30.71) | 0.92     | 204<br>(32.13) | 96<br>(28.07)  | 0.53 |
| <b>Signs of Pneumonia with a general danger sign n (%)</b> |      |                 |                |          |                |                |      |
| Lethargy or reduced level of consciousness                 | 1101 | 732<br>(39.52)  | 369<br>(37.77) | 0.39     | 247<br>(38.90) | 122<br>(35.67) | 0.33 |
| Inability to breastfeed or drink                           | 937  | 612<br>(33.05)  | 325<br>(33.27) | 0.46     | 211<br>(33.23) | 114<br>(33.33) | 0.97 |
| Convulsions                                                | 148  | 98<br>(5.29)    | 50<br>(5.12)   | 0.93     | 33<br>(5.20)   | 17<br>(4.97)   | 0.87 |
| Central Cyanosis                                           | 62   | 39<br>(2.11)    | 23<br>(2.35)   | 0.34     | 16<br>(2.52)   | 7<br>(2.05)    | 0.64 |
| <b>Malnutrition Status</b>                                 |      |                 |                |          |                |                |      |
| Normal *                                                   | 1880 | 1293<br>(69.82) | 587<br>(60.08) | < 0.0001 | 367<br>(57.80) | 220<br>(64.33) | 0.06 |
| Malnutrition*                                              | 517  | 333<br>(17.98)  | 184<br>(18.83) |          | 122<br>(19.21) | 62<br>(18.13)  |      |
| Severe malnutrition*                                       | 432  | 226<br>(12.20)  | 206<br>(21.08) |          | 146<br>(22.99) | 60<br>(17.54)  |      |

276 \*Normal-weight of age z score > -2SD; Malnutrition-weight-for-age z ≤ -2SD and Severe  
277 malnutrition-weight-for- age z ≤ -3SD

278

279 **Table 3** describes four multivariate unconditional logistic regression models to find associates of  
280 various abnormal CXR findings. After controlling for age, gender, symptoms of pneumonia,  
281 duration of illness, biomass fuel and malnutrition status of cases, statistically significant district-  
282 wise heterogeneity remained in the first three models. Model I, which compared abnormal versus  
283 normal CXRs, II, which compared CXRs with PEP alone or with other infiltrates versus normal  
284 and III, which compared CXRs with PEP alone versus normal, had similar associates for  
285 radiological abnormalities whereas Model IV, which compared CXRs with other infiltrates only  
286 versus normal, was different. Across all the four models, female gender and those with severe



malnutrition had statistically significantly higher risk for having abnormal CXRs. A higher risk of radiological abnormalities was also observed in those children with longer duration of illness.

**Table 3: Independent Associations between Chest Radiograph findings and demographic and clinical variables among hospitalized children of Community Acquired Pneumonia, using Unconditional Logistic Regression**

| Variables                                 | Model – I                      |         | Model – II                                                 |         | Model – III                       |         | Model – IV                                |         |
|-------------------------------------------|--------------------------------|---------|------------------------------------------------------------|---------|-----------------------------------|---------|-------------------------------------------|---------|
|                                           | Abnormal/Normal <sup>Ref</sup> |         | PEP alone or with other infiltrates /Normal <sup>Ref</sup> |         | PEP alone / Normal <sup>Ref</sup> |         | Other infiltrates / Normal <sup>Ref</sup> |         |
|                                           | Adjusted Odd Ratio (95%CI)     | p value | Adjusted Odd Ratio (95%CI)                                 | p value | Adjusted Odd Ratio (95%CI)        | p value | Adjusted Odd Ratio (95%CI)                | p value |
| <b>Districts</b>                          |                                |         |                                                            |         |                                   |         |                                           |         |
| Lucknow vs. Others                        | 1.58<br>(1.20-2.10)            | <0.0001 | 2.07<br>(1.48-2.89)                                        | <0.0001 | 2.20<br>(1.52-3.19)               | <0.0001 | 0.98<br>(0.65-1.47)                       | 0.93    |
| Etawah vs. Others                         | 1.22<br>(0.88-1.70)            | 0.23    | 1.30<br>(0.87-1.95)                                        | 0.19    | 1.49<br>(0.95-2.30)               | 0.07    | 1.17<br>(0.74-1.87)                       | 0.50    |
| Patna vs. Others                          | 1.67<br>(1.27-2.20)            | <0.0001 | 1.89<br>(1.36-2.64)                                        | <0.0001 | 2.25<br>(1.56-3.24)               | <0.0001 | 1.39<br>(0.95-2.07)                       | 0.09    |
| <b>Age – Group ( months)</b>              |                                |         |                                                            |         |                                   |         |                                           |         |
| 2-11 <sup>Ref</sup>                       |                                |         |                                                            |         |                                   |         |                                           |         |
| 12-59                                     | 0.92<br>(0.77-1.10)            | 0.34    | 0.95<br>(0.77-1.17)                                        | 0.62    | 1.03<br>(0.82-1.29)               | 0.79    | 0.86<br>(0.66-1.13)                       | 0.27    |
| <b>Gender</b>                             |                                |         |                                                            |         |                                   |         |                                           |         |
| Male <sup>Ref</sup>                       |                                |         |                                                            |         |                                   |         |                                           |         |
| Female                                    | 1.39<br>(1.16-1.66)            | <0.0001 | 1.34<br>(1.08-1.65)                                        | 0.008   | 1.28<br>(1.01-1.61)               | 0.03    | 1.48<br>(1.14-1.92)                       | 0.004   |
| <b>Symptoms of pneumonia<sup>¶</sup></b>  |                                |         |                                                            |         |                                   |         |                                           |         |
| Wheezing                                  | 0.83<br>(0.68-1.01)            | 0.06    | 0.72<br>(0.57-0.90)                                        | 0.005   | 0.75<br>(0.59-0.96)               | 0.02    | 1.14<br>(0.83-1.55)                       | 0.42    |
| Pallor                                    | 1.30<br>(1.08-1.58)            | 0.006   | 1.28<br>(1.03-1.60)                                        | 0.02    | 1.22<br>(0.95-1.55)               | 0.12    | 1.34<br>(1.01-1.77)                       | 0.04    |
| Vomiting everything                       | 0.90<br>(0.75-1.09)            | 0.28    | 0.80<br>(0.64-0.99)                                        | 0.04    | 0.78<br>(0.62-1.01)               | 0.05    | 1.09<br>(0.83-1.08)                       | 0.51    |
| <b>Duration of illness, fever (days )</b> |                                |         |                                                            |         |                                   |         |                                           |         |
|                                           | 1.06<br>(1.04-1.09)            | <0.0001 | 1.08<br>(1.04-1.12)                                        | <0.0001 | 1.08<br>(1.04-1.12)               | <0.0001 | 1.03<br>(0.98-1.48)                       | 0.24    |
| <b>Biomass fuel</b>                       |                                |         |                                                            |         |                                   |         |                                           |         |
|                                           | 1.28<br>(1.05-1.57)            | 0.02    | 1.39<br>(1.10-1.76)                                        | 0.006   | 1.40<br>(1.14-1.88)               | 0.003   | 1.08<br>(0.79-1.45)                       | 0.64    |

| Malnutrition Status  |                     |         |                     |         |                     |         |                     |       |
|----------------------|---------------------|---------|---------------------|---------|---------------------|---------|---------------------|-------|
| Normal *Ref          |                     |         |                     |         |                     |         |                     |       |
| Malnutrition*        | 1.18<br>(0.93-1.45) | 0.15    | 1.17<br>(0.91-1.52) | 0.23    | 1.17<br>(0.88-1.55) | 0.27    | 1.12<br>(0.82-1.52) | 0.47  |
| Severe malnutrition* | 1.65<br>(1.31-2.09) | <0.0001 | 1.82<br>(1.34-2.36) | <0.0001 | 1.87<br>(1.41-2.47) | <0.0001 | 1.62<br>(1.71-2.23) | 0.003 |

294 **Abbreviations:** <sup>Ref</sup> : Reference Category; PEP: Primary End-Point Pneumonia

295  
 296 **Footnotes:** ¶ No signs of pneumonia taken as a reference  
 297 \*Normal: weight-for-age z score > -2SD; Malnutrition: weight-for -age z ≤ -2SD; Severe  
 298 malnutrition: weight-for-age z ≤ -3SD

299

## 300 DISCUSSION

301 This active, prospective, hospital-based surveillance study was conducted to assess radiological  
 302 abnormalities in CXRs and to identify the demographic and clinical correlates of specific  
 303 radiological abnormalities in children aged 2-59 months, hospitalized with WHO defined CAP,  
 304 residing in pre-specified districts of Uttar Pradesh and Bihar. The study was conducted from  
 305 January 2015 to April 2017, prior to the introduction of PCV in the national immunization  
 306 programme of the Government of India.<sup>9</sup>

307 In our study, among interpretable CXRs, we found that 22.44% (635/2829) cases had PEP alone  
 308 or with infiltrates, 12.09% (342/2829) had other infiltrates only and 65.46% (1852/2829) had  
 309 normal findings. Our study used WHO case definition for CAP.<sup>19</sup> A panel of three trained  
 310 radiologists interpreted CXRs, adopting WHO recommended methodology.<sup>11 12</sup> These make our  
 311 study methodology robust and results generalizable.

312

313 There were 88.54% (2829/3195) interpretable CXRs in the current study. This is similar to 83%  
 314 (3587/3973) interpretable CXRs reported by Pneumonia Etiology Research for Child Health

1  
2  
3 315 (PERCH) study conducted on 4232 children (1-59 months) in nine sites in seven countries.<sup>27</sup>  
4  
5 316 Consistent with PERCH findings, a vaccine probe trial conducted in Gambia found proportion of  
6  
7 317 interpretable CXRs among unvaccinated cases of pneumonia to be 84.32% (242/287).<sup>28</sup>  
8  
9 318  
10  
11 319 There have been several studies in the past two decades, which have reported CXRs findings in  
12  
13 320 hospitalized cases of pediatric CAP. Almost all of these were conducted before the introduction  
14  
15 321 of PCV in their respective regions. A small prospective study conducted in Ethiopia reported  
16  
17 322 radiological abnormality in CXRs in 48.3% (95% CI 39.49-57.22) among 122 children aged 3  
18  
19 323 months to 14 years with clinically diagnosed WHO-defined severe pneumonia.<sup>29</sup> Similar  
20  
21 324 findings were reported from the Gambian vaccine probe trial where the proportion of  
22  
23 325 radiological abnormality was 45% (95% CI: 43.35-46.46) among unvaccinated hospitalized  
24  
25 326 cases of clinical pneumonia.<sup>28</sup> Likewise, PERCH study found that 54% (95% CI: 52.31-55.57)  
26  
27 327 of CXRs among cases of CAP were abnormal.<sup>27</sup> In all of these studies, proportion of cases with  
28  
29 328 abnormal CXRs is higher than 34.5% (95% CI 32.8-36.3) found by us in the current study.  
30  
31 329 However, our findings are similar to PERCH rural study site of Matlab, Bangladesh that reported  
32  
33 330 radiological abnormality in 35.3% (95% CI: 29.77-40.85) CXRs of hospitalized cases of CAP.<sup>27</sup>  
34  
35 331 Another PERCH urban site of Dhaka, Bangladesh reported 63.10% (95% CI 56.18 -70.02) cases  
36  
37 332 with abnormal CXRs.<sup>27</sup> In our study, radiological abnormalities in CXRs were higher in cases  
38  
39 333 from largely urban districts of Patna and Lucknow compared to rural districts of Darbhanga and  
40  
41 334 Etawah. This is consistent with rural-urban differences in Bangladesh sites of PERCH.<sup>27</sup>  
42  
43 335 Variation in CXR findings among cases of CAP may be due to place of residence, infecting  
44  
45 336 organism, immune response of patient and prior duration of disease.  
46  
47  
48  
49  
50  
51  
52  
53  
54 337  
55  
56  
57  
58  
59  
60

1  
2  
3 338 In 2016, WHO's Department of Immunization, Vaccines and Biologicals standardized the  
4  
5 339 categorization of radiological pneumonia and established that PEP can be taken as a good  
6  
7 340 surrogate marker of bacterial pneumonia in epidemiological and vaccine efficacy studies.<sup>11</sup> In  
8  
9 341 our study, 22.44 % (95% C.I. 20.90 -23.98), CXRs had PEP alone or with other infiltrates and  
10  
11 342 hence were probably bacterial in etiology. This is similar to findings of PERCH study that  
12  
13 343 reported PEP alone or with other infiltrates in 27% (95% C.I. 25.50 -28.40) hospitalized cases of  
14  
15 344 CAP.<sup>27</sup> However, a study conducted in Gambia reported that 45% (95% CI: 43.35-46.46) non-  
16  
17 345 vaccinated children had PEP and/or other infiltrates<sup>28</sup> which is higher than that found by us or  
18  
19 346 the PERCH study. PEP in CXR has been associated with increased risk of treatment failure  
20  
21 347 (p=0.002), increased length of hospitalization (p=0.0003) and more days of respiratory support  
22  
23 348 (p=0.002) in Botswana when compared with cases reporting `no significant pathology` on  
24  
25 349 CXRs.<sup>30</sup>

26  
27  
28  
29  
30  
31 350  
32  
33 351 In our study, female gender (p<0.001) was at the higher risk of developing radiological  
34  
35 352 abnormalities compared to males (**table 3**). The results are in concordance with a hospital-based  
36  
37 353 case-control study carried out in Brazil that reported male gender as a protective factor against  
38  
39 354 pneumonia (OR=0.53; 95%CI 0.39–0.72).<sup>31</sup> However, a study in Mozambique, Africa reported  
40  
41 355 that male gender was not significantly associated with presence of radiological abnormalities  
42  
43 356 (OR =0.77; 95%CI 0.56–1.05) in children (0-59 months) suffering from severe pneumonia.<sup>32</sup> In  
44  
45 357 contrast, a Gambian study reported male preponderance for all pneumonia that was most marked  
46  
47 358 for those whose CXRs showed `other infiltrates/abnormalities`.<sup>28</sup>

48  
49  
50  
51 359  
52  
53  
54  
55  
56  
57  
58  
59

1  
2  
3 360 In our study, we observed differential care-seeking by gender for CAP in all four project  
4  
5 361 districts. Although females admitted with CAP were at higher risk of having radiological  
6  
7 362 abnormalities, lower proportions were hospitalized. Gender inequality in health care seeking for  
8  
9 363 females is common in India, as in other South Asian countries.<sup>33 34</sup> Since there is no health-care  
10  
11 364 financing or provision of health insurance in India, in case of severe illness, parents are less  
12  
13 365 likely to incur out-of-pocket expenditure or incur debts to pay expenses on medical treatment of  
14  
15 366 their daughters as compared to sons.<sup>35</sup> Another Indian study found that male children were five  
16  
17 367 times more likely to be taken early for medical care and three times more likely to be seen by  
18  
19 368 qualified medical doctors compared to female children.<sup>36</sup> We also found that large proportion of  
20  
21 369 hospitalized cases of pneumonia were from urban areas, as there is poor health-care seeking from  
22  
23 370 rural areas.<sup>37</sup>  
24  
25  
26  
27  
28  
29  
30

31 372 A systematic review with meta-analysis conducted in 2019 suggests that no one clinical feature  
32  
33 373 is sufficient on its own to diagnose radiological pneumonia.<sup>38</sup> However other socio-demographic  
34  
35 374 and clinical correlates of abnormal CXRs found by us in Model 1 (abnormal versus normal),  
36  
37 375 which increased the risk of radiological abnormalities were presence of pallor, severe  
38  
39 376 malnutrition, longer duration of illness and exposure to biomass fuel. In developing countries  
40  
41 377 exposure to biomass fuel used for cooking has been reported as an important risk factor for  
42  
43 378 CAP.<sup>39</sup> In rural India, majority of the households use biomass fuel like firewood, dung cakes and  
44  
45 379 wood for cooking.<sup>40</sup> Young children are at risk to adverse effects of exposure to biomass fuel as  
46  
47 380 either the households have no separate cooking space or have poor ventilation and sometimes  
48  
49 381 young children stay with their mother while she cooks.  
50  
51  
52  
53  
54  
55  
56  
57  
58  
59  
60

1  
2  
3 383 Other correlates of PEP/radiological pneumonia, which were more likely to be bacterial in  
4  
5 384 etiology, as found in Model II, which compared PEP alone or with other infiltrates versus  
6  
7  
8 385 normal, and Model III, which compared PEP alone versus normal (**table 3**), besides those found  
9  
10 386 in Model I, were presence of vomiting everything and wheeze on auscultation, both of which  
11  
12 387 were found to be protective. These symptoms/signs are more often reported in viral pneumonia.<sup>41</sup>  
13  
14 388 Correlates of radiological abnormalities of `other infiltrates` (Model IV which compared other  
15  
16 389 infiltrates with normal), which increased the risk, were again female gender, pallor and severe  
17  
18 390 malnutrition. Hence it is difficult to attribute radiological findings of other infiltrates to either  
19  
20 391 bacterial or viral etiology.  
21  
22  
23  
24  
25

26 393 Based on our study, almost two-third hospitalized cases of CAP had normal CXRs and could be  
27  
28 394 perhaps of viral etiology. This is supported by a recent study that reported 61.4% (95% CI 57.3–  
29  
30 395 65.6) cases to be viral.<sup>41</sup> One-third of cases of CAP had abnormal CXRs and thus were more  
31  
32 396 likely to be bacterial in etiology.  
33  
34  
35  
36  
37

38 398 In India, 13-valent PCV has been introduced in May 2017. A three dose schedule is followed  
39  
40 399 with two primary and one booster, at 6 weeks, 14 weeks and 9 months of age, respectively. PCV  
41  
42 400 13 provides coverage against 13 serotypes (1, 3, 4, 5, 6A, 6B, 7F, 9V, 14, 18C, 19A, 19F and  
43  
44 401 23F).<sup>42</sup> Several studies have assessed serotype distribution of pneumococcal disease among  
45  
46 402 children in India. A study conducted in Vellore, India, found that the most common serotypes  
47  
48 403 causing invasive infections among under-five children were 14, 19F, 5, 6A and 6B, all of which  
49  
50 404 are covered by the 13-valent PCV.<sup>43</sup> Another population-based surveillance study conducted in  
51  
52 405 rural Bangladesh found that the most common serotypes of *S. pneumoniae* were 1, 5, 14, 18C  
53  
54  
55  
56  
57  
58  
59  
60

1  
2  
3 406 and 19A and 38 which caused invasive disease and all but one were covered by the 13 valent  
4  
5 407 vaccine.<sup>44</sup> A systematic review and meta-analysis of data collected on Invasive Pneumococcal  
6  
7 408 Disease serotypes from under-five children during the pre-PCV period (between 1980-2007)  
8  
9 409 found that serotypes included in both the 10-valent and 13-valent PCVs accounted for 10 million  
10  
11  
12 410 cases and 600,000 deaths worldwide.<sup>45</sup>  
13  
14  
15

16 411  
17  
18 412 Several strengths of the study are worth-noting. This was an active, prospective, multisite study  
19  
20 413 where recruitments were done from a large hospital surveillance network established especially  
21  
22 414 for the study in four districts of two Indian states that have high under-five mortality rates.  
23  
24 415 Standard WHO definition was used to identify hospitalized cases of CAP. Radiological  
25  
26 416 abnormalities were interpreted by a panel of three trained radiologists at locations out of the  
27  
28 417 surveillance network, blinded to each other as well as clinical features of the case. Despite these  
29  
30 418 strengths, our study findings have certain limitations. First, in our study, pre-existing x-rays  
31  
32 419 machines which were not of uniform specification were used. This might have caused variation  
33  
34 420 in quality of CXR images, though this error was minimized by digitizing the CXR images  
35  
36 421 centrally. Secondly, in our study, clinical data collection was recorded by clinicians in the  
37  
38 422 network hospitals and there could be observer bias. This could also have lead to possibly over  
39  
40 423 reporting of presence of wheezing. In this study, we have not collected information on use of  
41  
42 424 antibiotic prior to hospitalizations; as such information is not available reliably. However, in  
43  
44 425 another study, done in one of the network hospitals of Lucknow in the recent past, it was found  
45  
46 426 that 70.5% children tested positive for antibiotics on urine examination.<sup>46</sup> Prior use of antibiotics  
47  
48 427 could have possibly lead to under-estimation of radiological pneumonia. We also observed that  
49  
50  
51  
52  
53  
54  
55  
56  
57  
58  
59  
60

1  
2  
3 428 pulse oxymetry was not routinely done in the network hospitals. This could have an impact on  
4  
5 429 the case management but would not have affected the radiological findings of CXRs.  
6  
7

8 430  
9

## 11 431 **CONCLUSION**

12  
13  
14 432 Among hospitalized cases of CAP, almost one-third children had abnormal chest radiographs of  
15  
16 433 which about two-thirds had abnormalities related with possible bacterial etiology (*Streptococcus*  
17  
18 434 *pneumonia*). Hence, the introduction of pneumococcal vaccination is likely to reduce the burden  
19  
20 435 of childhood pneumonia in India. Since the study was done prior to the introduction of PCV in  
21  
22 436 India, continued surveillance will be required to assess the impact of PCV on radiological  
23  
24 437 findings in cases admitted with CAP. The impact of introduction of PCV in the national  
25  
26 438 immunization programme on under-five mortality rate and burden of CAP needs to be assessed  
27  
28 439 too.  
29  
30  
31  
32

33 440  
34

35  
36 441 **Acknowledgements:** We thank the state governments of Uttar Pradesh and Bihar for giving  
37  
38 442 us permission to conduct the study. We extend our gratitude to participating tertiary and  
39  
40 443 secondary care hospitals for their contribution in this study. We offer thanks to Dr. Kamrun  
41  
42 444 Nahar from the International Centre for Diarrhoeal Disease Research, Bangladesh for training  
43  
44 445 the panel of study radiologists. Members of the Lucknow Community-Acquired Pneumonia  
45  
46 446 (CAP) Group: King George's Medical University (KGMU), Lucknow, India: Prof. Shally  
47  
48 447 Awasthi, Department of Pediatrics, Prof. Neera Kohli, Department of Radio-diagnosis, Prof.  
49  
50 448 Monika Agarwal, Department of Community Medicine and Public Health; Mr. Puneet  
51  
52 449 Dhasmana, Project Staff; Patna Medical College and Hospital, Patna, Bihar-Prof. Neelam Verma  
53  
54  
55  
56  
57  
58  
59  
60



1  
2  
3 450 and Prof. Chandra Bhushan Kumar, Department of Pediatrics; Darbhanga Medical College and  
4  
5 451 Hospital, Darbhanga, Bihar, India- Prof. Chittaranjan Roy, Department of Community Medicine,  
6  
7 452 Prof. Kripanath Mishra, Department of Pediatrics; Uttar Pradesh University of Medical Sciences,  
8  
9 453 Etawah, Uttar Pradesh, India- Prof. Pankaj Kumar Jain, Department of Community Medicine,  
10  
11 454 Prof. Rajesh Yadav, Department of Pediatrics.

12  
13  
14 455 **Contributors:** The study was conceived and designed by SA. CAP study group performed data  
15  
16 456 acquisition. CMP and NM<sup>1</sup> conducted the statistical analysis of the data. The paper was written by  
17  
18 457 SA, TR, MA and CMP. AC, NM<sup>3</sup>, RCS and NK interpreted chest x-rays. All authors were  
19  
20 458 involved in drafting and revising the work and approved final submission.

21  
22 459 **Funding statement:** The study was supported by Bill & Melinda Gates Foundation  
23  
24 460 (<https://www.gatesfoundation.org/>) via Grant No: OPP1118005. Funding agency had no role in  
25  
26 461 the design of study and collection, analysis and interpretation of data, or in writing the  
27  
28 462 manuscript.

29  
30 463 **Competing interests:** None declared.

31  
32 464 **Patient consent for publication:** Not required.

33  
34 465 **Ethics approval:** The Institutional Ethics Committee of King George's Medical University  
35  
36 466 (Lucknow), The Uttar Pradesh University of Medical Sciences (Etawah), Patna Medical College  
37  
38 467 and Hospital (Patna) and Darbhanga Medical College and Hospital (Darbhanga) gave ethical  
39  
40 468 approval for conduct of study.

41  
42 469 **Provenance and peer review:** Not commissioned; externally peer reviewed.

43  
44 470 **Data sharing statement:** The data contained within this study can be obtained by writing to  
45  
46 471 [shally07@gmail.com](mailto:shally07@gmail.com)

1  
2  
3 472 **Copyright information:** This is an Open Access article distributed in accordance with the  
4  
5 473 Creative Commons Attribution Non Commercial (CC BY-NC 4.0) license, which permits others  
6  
7 474 to distribute, remix, adapt, build upon this work non-commercially, and license their derivative  
8  
9 475 works on different terms, provided the original work is properly cited and the use is non-  
10  
11 476 commercial. See: <http://creativecommons.org/licenses/by-nc/4.0/>  
12  
13  
14

15 477

### 17 478 **Supporting Information**

18  
19 479 S1 Appendix: Chest radiograph interpretation form  
20  
21  
22 480  
23  
24

## 25 481 **REFERENCES:**

- 26  
27  
28 482 1. UNICEF U. Levels and trends in child mortality. Estimates developed by the UN inter-  
29  
30 483 agency group for child mortality estimation. 2011.
- 31  
32  
33 484 2. Amouzou A, Velez LC, Tarekegn H, *et al.* One is too many: ending child deaths from  
34  
35 485 pneumonia and diarrhoea. New York: Unicef, 2016. pp 73–75
- 36  
37  
38 486 3. Mathew JL, Patwari AK, Gupta P, *et al.* Acute respiratory infection and pneumonia in India:  
39  
40 487 a systematic review of literature for advocacy and action: UNICEF-PHFI series on newborn  
41  
42 488 and child health, India. *Indian Pediatr* 2011; 48: 191–218.
- 43  
44  
45 489 4. Farooqui H, Jit M, Heymann DL, *et al.* Burden of severe pneumonia, pneumococcal  
46  
47 490 pneumonia and pneumonia deaths in Indian states: modelling based estimates. *PLoS One*  
48  
49 491 2015 ; 10(6).  
50  
51  
52  
53  
54  
55  
56  
57  
58  
59  
60

- 1  
2  
3 492 5. Rudan I, O'Brien KL, Nair H, *et al.* Epidemiology and etiology of childhood pneumonia in  
4  
5 493 2010: estimates of incidence, severe morbidity, mortality, underlying risk factors and  
6  
7 494 causative pathogens for 192 countries. *Journal of global health.* 2013 Jun; 3(1).  
8  
9  
10 495 6. Leung DT, Chisti MJ, Pavia AT. Prevention and control of childhood pneumonia and  
11  
12 496 diarrhea. *Pediatric Clinics.* 2016 Feb 1;63(1):67-79.  
13  
14  
15 497 7. Virkki R, Juven T, Rikalainen H, *et al.* Differentiation of bacterial and viral pneumonia in  
16  
17 498 children. *Thorax.* 2002 May 1;57(5):438-41.  
18  
19 499 8. World Health Organization. Pneumococcal conjugate vaccines in infants and children under  
20  
21 500 5 years of age: WHO position paper—February 2019. [Accessed 12 July 2019]  
22  
23  
24 501 9. Government of India. Introduction of Pneumococcal Conjugate Vaccine: Operational  
25  
26 502 Guidelines. Ministry of Health and Family Welfare, 2017 Available:  
27  
28 503 [https://nhm.gov.in/New\\_Updates\\_2018/NHM\\_Components/Immunization/Guidelines\\_for\\_i](https://nhm.gov.in/New_Updates_2018/NHM_Components/Immunization/Guidelines_for_immunization/Operational_Guidelines_for_PCV_introduction.pdf)  
29  
30 504 [mmunization/Operational\\_Guidelines\\_for\\_PCV\\_introduction.pdf](https://nhm.gov.in/New_Updates_2018/NHM_Components/Immunization/Guidelines_for_immunization/Operational_Guidelines_for_PCV_introduction.pdf). [Accessed 12 July 2019]  
31  
32  
33 505 10. Cherian T, Mulholland EK, Carlin JB, *et al.* Standardized interpretation of paediatric chest  
34  
35 506 radiographs for the diagnosis of pneumonia in epidemiological studies. *Bulletin of the World*  
36  
37 507 *Health Organization.* 2005;83:353-9  
38  
39  
40 508 11. Pneumonia Vaccine Trial Investigators' Group. Standardization of Interpretation of Chest  
41  
42 509 Radiographs for the Diagnosis of Pneumonia in Children. Geneva: Department of Vaccines  
43  
44 510 and Biologicals, World Health Organization; 2001  
45  
46  
47 511 12. Mahomed N, Fancourt N, De Campo J, *et al.* Preliminary report from the World Health  
48  
49 512 Organization chest radiography in epidemiological studies project. *Pediatric radiology.* 2017  
50  
51 513 Oct 1;47(11):1399-404.  
52  
53  
54  
55  
56  
57  
58  
59  
60

- 1  
2  
3 514 13. Greenberg D, Givon-Lavi N, Ben-Shimol S, *et al.* Impact of PCV7/PCV13 introduction on  
4  
5 515 community-acquired alveolar pneumonia in children < 5 years. *Vaccine*. 2015 Aug  
6  
7 516 26;33(36):4623-9. 6.
- 8  
9  
10 517 14. Sutcliffe CG, Shet A, Varghese R, *et al.* Nasopharyngeal carriage of *Streptococcus*  
11  
12 518 pneumoniae serotypes among children in India prior to the introduction of pneumococcal  
13  
14 519 conjugate vaccines: a cross-sectional study. *BMC Infect Dis*. 2019 Dec;19(1):605.
- 15  
16  
17 520 15. Annual health survey (AHS) factsheet 2012–13 Uttar Pradesh [Internet]. New Delhi: Office  
18  
19 521 of Registrar General & Census Commissioner, Ministry of Home Affairs, Government of  
20  
21 522 India; 2010–2011.  
22  
23 523 Available:[http://www.censusindia.gov.in/vital\\_statistics/AHSBulletins/AHS\\_Factsheets\\_201](http://www.censusindia.gov.in/vital_statistics/AHSBulletins/AHS_Factsheets_2012-13/FACTSHEET-UTTAR_PRADESH.pdf)  
24  
25 524 [2-13/FACTSHEET-UTTAR\\_PRADESH.pdf](http://www.censusindia.gov.in/vital_statistics/AHSBulletins/AHS_Factsheets_2012-13/FACTSHEET-UTTAR_PRADESH.pdf). [Accessed 5 August 2019]
- 26  
27  
28 525 16. Annual health survey (AHS) factsheet 2012–13 Bihar [Internet]. New Delhi: Office of  
29  
30 526 Registrar General & Census Commissioner, Ministry of Home Affairs, Government of India;  
31  
32 527 2010–2011.  
33  
34 528 Available:[http://www.censusindia.gov.in/vital\\_statistics/AHSBulletins/AHS\\_Factsheets\\_201](http://www.censusindia.gov.in/vital_statistics/AHSBulletins/AHS_Factsheets_2012-13/FACTSHEET-Bihar.pdf)  
35  
36 529 [2-13/FACTSHEET-Bihar.pdf](http://www.censusindia.gov.in/vital_statistics/AHSBulletins/AHS_Factsheets_2012-13/FACTSHEET-Bihar.pdf). [Accessed 5 August 2019].
- 37  
38  
39 530 17. Awasthi S, Pandey CM, Verma T, *et al.* Incidence of community-acquired pneumonia in  
40  
41 531 children aged 2-59 months of age in Uttar Pradesh and Bihar, India, in 2016: An indirect  
42  
43 532 estimation. *PloS one*. 2019 Mar 20;14(3):e0214086.
- 44  
45  
46 533 18. Awasthi S, Singh JV, Kohli N, *et al.* Hospital-based surveillance for radiological pneumonia  
47  
48 534 in children under 5 years of age in Uttar Pradesh and Bihar. *Pediatric Infectious Disease*.  
49  
50 535 2016 Jun 30;8(2):52-7.
- 51  
52  
53  
54  
55  
56  
57  
58  
59  
60

- 1  
2  
3 536 19. World Health Organization. Pocket Book of Hospital Care for Children: Guidelines for the  
4  
5 537 Management of Common Childhood Illnesses. 2nd edn. Geneva, Switzerland: World Health  
6  
7 538 Organization, 2013.
- 8  
9  
10 539 20. Charan J, Biswas T. How to calculate sample size for different study designs in medical  
11  
12 540 research?. *Indian journal of psychological medicine*. 2013 Apr;35(2):121.
- 13  
14 541 21. Integrated Management of Childhood Illness (IMCI) Chart Booklet [online] Geneva: World  
15  
16 542 Health Organization. Available:  
17  
18 543 [https://apps.who.int/iris/bitstream/handle/10665/104772/9789241506823\\_Chartbook\\_eng.pdf](https://apps.who.int/iris/bitstream/handle/10665/104772/9789241506823_Chartbook_eng.pdf)  
19  
20 544 [Accessed 19 December 2019].
- 21  
22  
23 545 22. Bassignani MJ, Bubash-Faust L, Ciambotti J, *et al*. Conversion of teaching file cases from  
24  
25 546 film to digital format: a comparison between use of a diagnostic-quality digitizer and use of a  
26  
27 547 flatbed scanner with transparency adapter. *Acad Radiol*. 2003 May 1;10(5):536-42.
- 28  
29  
30 548 23. World Health Organization. The WHO Anthro Survey Analyser. In: World Health  
31  
32 549 Organization [Internet]. Available: <https://www.who.int/nutgrowthdb/software/en/>.  
33  
34 550 [Accessed: 10 June 2019].
- 35  
36  
37 551 24. Horton NJ, Kleinman KP. Much ado about nothing: A comparison of missing data methods  
38  
39 552 and software to fit incomplete data regression models. *The American Statistician*. 2007 Feb  
40  
41 553 1;61(1):79-90.
- 42  
43  
44 554 25. SPSS Inc. Released 2009. SPSS for Windows [software], Version 22.0. Chicago, SPSS Inc.  
45  
46 555 Available from: [www.spss.com](http://www.spss.com)
- 47  
48  
49 556 26. von Elm E, Altman DG, Egger M, *et al*. The strengthening the reporting of observational  
50  
51 557 studies in epidemiology (STROBE) statement: guidelines for reporting observational studies.  
52  
53 558 *J Clin Epidemiol* 2008;61:344-9

- 1  
2  
3 559 27. Fancourt N, Deloria Knoll M, Baggett HC, *et al.* Chest radiograph findings in childhood  
4  
5 560 pneumonia cases from the multisite PERCH study. *Clin Infect Dis.* 2017 May  
6  
7  
8 561 29;64(suppl\_3):S262-70  
9  
10 562 28. Enwere G, Cheung YB, Zaman SM, *et al.* Epidemiology and clinical features of pneumonia  
11  
12 563 according to radiographic findings in Gambian children. *Trop Med Int Health.* 2007  
13  
14 564 Nov;12(11):1377-85.  
15  
16 565 29. Meiron Hassen, Alemayehu Toma, Mulugeta Tesfay, *et al.* Radiologic Diagnosis and  
17  
18 566 Hospitalization among Children with Severe Community Acquired Pneumonia: A  
19  
20 567 Prospective Cohort Study. *Biomed Res Int*, vol. 2019, Article ID 6202405, 8 pages, 2019.  
21  
22 568 <https://doi.org/10.1155/2019/6202405>.  
23  
24  
25 569 30. Kelly MS, Crotty EJ, Rattan MS, *et al.* Chest radiographic findings and outcomes of  
26  
27 570 pneumonia among children in Botswana. *Pediatr Infect Dis J.* 2016 Mar;35(3):257.  
28  
29  
30 571 31. da Fonseca Lima EJ, Mello MJ, Lopes MI, *et al.* Risk factors for community-acquired  
31  
32 572 pneumonia in children under five years of age in the post-pneumococcal conjugate vaccine  
33  
34 573 era in Brazil: a case control study. *BMC Pediatr.* 2016 Dec;16(1):157.  
35  
36  
37 574 32. Sigauque B, Roca A, Bassat Q, *et al.* Severe pneumonia in Mozambican young children:  
38  
39 575 clinical and radiological characteristics and risk factors. *J Trop Pediatr.* 2009 Apr  
40  
41 576 28;55(6):379-87.  
42  
43  
44 577 33. Ismail SA, McCullough A, Guo S, *et al.* Gender-related differences in care-seeking  
45  
46 578 behaviour for newborns: a systematic review of the evidence in South Asia. *BMJ global*  
47  
48 579 *health.* 2019 May 1;4(3):e001309.  
49  
50  
51 580 34. Fikree FF, Pasha O. Role of gender in health disparity: the South Asian context. *BMJ*  
52  
53 581 2004;328:823–6. 10.1136/bmj.328.7443.823  
54  
55  
56  
57  
58  
59

- 1  
2  
3 582 35. Asfaw A, Lamanna F, Klasen S. Gender gap in parents' financing strategy for hospitalization  
4  
5 583 of their children: evidence from India. *Health economics*. 2010 Mar;19(3):265-79.  
6  
7  
8 584 36. Pandey A, Sengupta PG, Mondal SK, *et al*. Gender differences in healthcare-seeking during  
9  
10 585 common illnesses in a rural community of West Bengal, India. *Journal of Health, Population*  
11  
12 586 *and Nutrition*. 2002 Dec 1:306-11.  
13  
14  
15 587 37. Jana A, Basu R. Examining the changing health care seeking behavior in the era of health  
16  
17 588 sector reforms in India: evidences from the National Sample Surveys 2004 & 2014. *Global*  
18  
19 589 *health research and policy*. 2017 Dec;2(1):6.  
20  
21  
22 590 38. Rambaud-Althaus C, Althaus F, Genton B, *et al*. Clinical features for diagnosis of  
23  
24 591 pneumonia in children younger than 5 years: a systematic review and meta-analysis. *Lancet*  
25  
26 592 *Infect Dis*. 2015 Apr 1;15(4):439-50  
27  
28  
29 593 39. Awasthi S, Glick AH, Fletcher RH. Effect of cooking fuels on Respiratory Diseases in Pre-  
30  
31 594 school children in Lucknow, India. *Am J Trop Med Hyg* 1996; 55: 48-51  
32  
33 595 40. Tielsch JM, Katz J, Thulasiraj RD, *et al*. Exposure to indoor biomass fuel and tobacco smoke  
34  
35 596 and risk of adverse reproductive outcomes, mortality, respiratory morbidity and growth  
36  
37 597 among newborn infants in south India. *Int J Epidemiol*. 2009 Sep 16;38(5):1351-63.  
38  
39  
40 598 41. O'Brien KL, Baggett HC, Brooks WA, *et al*. Causes of severe pneumonia requiring hospital  
41  
42 599 admission in children without HIV infection from Africa and Asia: the PERCH multi-country  
43  
44 600 case-control study. *The Lancet*. 2019 Jun 27  
45  
46  
47 601 42. World Health Organization. Pneumococcal conjugate vaccines in infants and children under  
48  
49 602 5 years of age: WHO position paper–February 2019. Accessed 12th March. 2019.  
50  
51  
52  
53  
54  
55  
56  
57  
58  
59  
60

- 1  
2  
3 603 43. Balaji V, Jayaraman R, Verghese VP, *et al.* Pneumococcal serotypes associated with  
4  
5 604 invasive disease in under five children in India & implications for vaccine policy. The Indian  
6  
7  
8 605 journal of medical research. 2015 Sep;142(3):286.  
9  
10 606 44. Arifeen SE, Saha SK, Rahman S, *et al.* Invasive pneumococcal disease among children in  
11  
12 607 rural Bangladesh: results from a population-based surveillance. Clinical Infectious Diseases.  
13  
14 608 2009 Mar 1;48 (Supplement\_2):S103-13.  
15  
16 609 45. Johnson HL, Deloria-Knoll M, Levine OS, *et al.* Systematic evaluation of serotypes causing  
17  
18 610 invasive pneumococcal disease among children under five: the pneumococcal global serotype  
19  
20 611 project. PLoS medicine. 2010 Oct 5;7(10):e1000348  
21  
22  
23 612 46. Bénet T, Picot VS, Awasthi S, *et al.* Severity of pneumonia in under 5-year-old children from  
24  
25 613 developing countries: a multicenter, prospective, observational study. The American journal  
26  
27 614 of tropical medicine and hygiene. 2017 Jul 12;97(1):68-76  
28  
29  
30  
31 615

### 616 **Figure Legend**

32  
33  
34 617 Figure 1: Flow diagram of cases of community acquired pneumonia recruited from participating  
35  
36 618 districts before the introduction of pneumococcal conjugate vaccine (January 2015-April 2017)  
37  
38  
39  
40  
41  
42  
43  
44  
45  
46  
47  
48  
49  
50  
51  
52  
53  
54  
55  
56  
57  
58  
59  
60



Figure 1: Flow diagram of cases of community acquired pneumonia recruited from participating districts before introduction of pneumococcal conjugate vaccine (January 2015-April 2017)

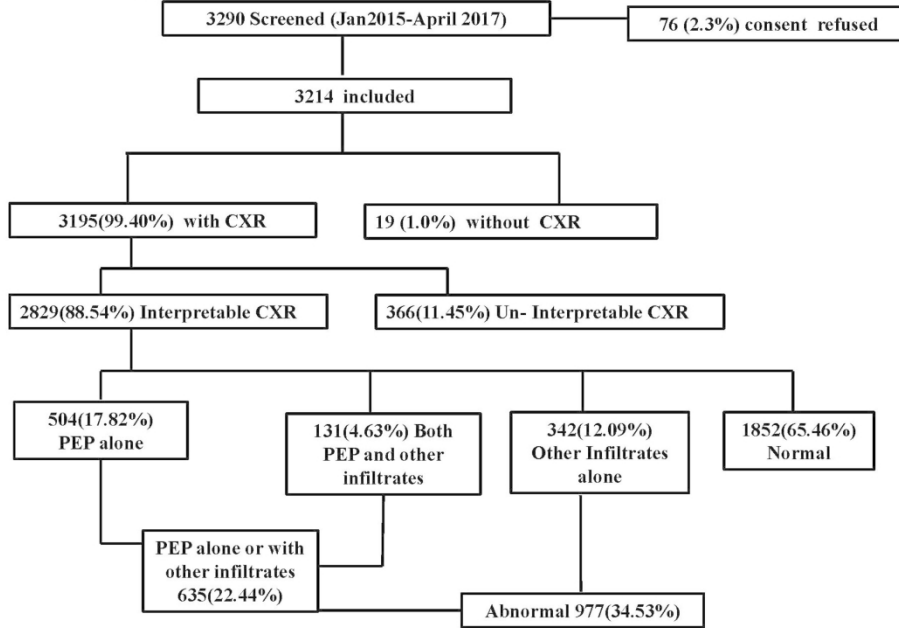

Figure 1: Flow diagram of cases of community acquired pneumonia recruited from participating districts before the introduction of pneumococcal conjugate vaccine (January 2015-April 2017)

254x190mm (300 x 300 DPI)

**Childhood Pneumonia Surveillance**  
Department of Paediatrics, KGMU, Lucknow ,UP

**Form-R**  
(RADIOLOGY REPORT FORM)

|    |                                        |                                                                                                                                                                                                                                                                                      |
|----|----------------------------------------|--------------------------------------------------------------------------------------------------------------------------------------------------------------------------------------------------------------------------------------------------------------------------------------|
| 1  | <b>Drs_ID</b>                          | [ ][ ][ ][ ]                                                                                                                                                                                                                                                                         |
|    | <b>Radiology Report</b>                | <b>Patient Details</b>                                                                                                                                                                                                                                                               |
| 2  | <b>IDNo:</b>                           | [ ] / [ ] / [ ][ ][ ][ ][ ][ ][ ]<br>State /District / Unit / Subject number<br>(For office use)                                                                                                                                                                                     |
| 2  | <b>Date Of Report</b>                  | [ ][ ]/[ ][ ]/[ ][ ][ ][ ] (DD/MM/YYYY)                                                                                                                                                                                                                                              |
|    | <b>Report Details</b>                  | <b>Findings ( tick one)</b>                                                                                                                                                                                                                                                          |
| 3  | <b>Image Quality</b>                   | Adequate <input type="checkbox"/> Suboptimal <input type="checkbox"/> Un-interpretable <input type="checkbox"/>                                                                                                                                                                      |
| 4  | <b>Significant Pathology</b>           | Yes <input type="checkbox"/> No <input type="checkbox"/> Un-interpretable <input type="checkbox"/>                                                                                                                                                                                   |
| 5  | <b>End Point Consolidation</b>         |                                                                                                                                                                                                                                                                                      |
| 5a | Left                                   | Yes <input type="checkbox"/> No <input type="checkbox"/> Un-interpretable <input type="checkbox"/>                                                                                                                                                                                   |
| 5b | Right                                  | Yes <input type="checkbox"/> No <input type="checkbox"/> Un-interpretable <input type="checkbox"/>                                                                                                                                                                                   |
|    |                                        | Uninterpretable                                                                                                                                                                                                                                                                      |
| 6  | <b>Other Infiltrates/Abnormalities</b> |                                                                                                                                                                                                                                                                                      |
| 6a | Left                                   | Yes <input type="checkbox"/> No <input type="checkbox"/> Un-interpretable <input type="checkbox"/>                                                                                                                                                                                   |
| 6b | Right                                  | Yes <input type="checkbox"/> No <input type="checkbox"/> Un-interpretable <input type="checkbox"/>                                                                                                                                                                                   |
| 7  | <b>Pleural Fluid</b>                   |                                                                                                                                                                                                                                                                                      |
| 7a | Left                                   | Yes <input type="checkbox"/> No <input type="checkbox"/> Un-interpretable <input type="checkbox"/>                                                                                                                                                                                   |
| 7b | Right                                  | Yes <input type="checkbox"/> No <input type="checkbox"/> Un-interpretable <input type="checkbox"/>                                                                                                                                                                                   |
| 8  | <b>Comments:</b>                       | <input style="width: 100%; height: 15px;" type="text"/>                                                                                                                                                                                                                              |
| 9  | <b>Conclusion:</b>                     | a) Primary endpoint pneumonia only <input type="checkbox"/><br>b) Other infiltrate only <input type="checkbox"/><br>c) Both PEP and other infiltrate <input type="checkbox"/><br>d) Normal <input type="checkbox"/><br>e) Un-interpretable for any findings <input type="checkbox"/> |

STROBE Statement—Checklist of items that should be included in reports of *cross-sectional studies*

|                              | Item No                                                                            | Recommendation                                                                                                                                                                                    | Page Number      |
|------------------------------|------------------------------------------------------------------------------------|---------------------------------------------------------------------------------------------------------------------------------------------------------------------------------------------------|------------------|
| <b>Title and abstract</b>    | 1                                                                                  | (a) Indicate the study's design with a commonly used term in the title or the abstract                                                                                                            | 1                |
|                              |                                                                                    | (b) Provide in the abstract an informative and balanced summary of what was done and what was found                                                                                               | 2-3              |
| <b>Introduction</b>          |                                                                                    |                                                                                                                                                                                                   |                  |
| Background/rationale         | 2                                                                                  | Explain the scientific background and rationale for the investigation being reported                                                                                                              | 4                |
| Objectives                   | 3                                                                                  | State specific objectives, including any pre-specified hypotheses                                                                                                                                 | 5                |
| <b>Methods</b>               |                                                                                    |                                                                                                                                                                                                   |                  |
| Study design                 | 4                                                                                  | Present key elements of study design early in the paper                                                                                                                                           | 5                |
| Setting                      | 5                                                                                  | Describe the setting, locations, and relevant dates, including periods of recruitment, exposure, follow-up, and data collection                                                                   | 5                |
| Participants                 | 6                                                                                  | (a) Give the eligibility criteria, and the sources and methods of selection of participants                                                                                                       | 5-6              |
| Variables                    | 7                                                                                  | Clearly define all outcomes, exposures, predictors, potential confounders, and effect modifiers. Give diagnostic criteria, if applicable                                                          | 5-6              |
| Data sources/<br>measurement | 8*                                                                                 | For each variable of interest, give sources of data and details of methods of assessment (measurement). Describe comparability of assessment methods if there is more than one group              | 7-8              |
| Bias                         | 9                                                                                  | Describe any efforts to address potential sources of bias                                                                                                                                         | 25               |
| Study size                   | 10                                                                                 | Explain how the study size was arrived at                                                                                                                                                         | 6                |
| Quantitative variables       | 11                                                                                 | Explain how quantitative variables were handled in the analyses. If applicable, describe which groupings were chosen and why                                                                      | 11-13            |
| Statistical methods          | 12                                                                                 | (a) Describe all statistical methods, including those used to control for confounding                                                                                                             | 11-13            |
|                              |                                                                                    | (b) Describe any methods used to examine subgroups and interactions                                                                                                                               | Table 1, 2 & 3   |
|                              | (c) Explain how missing data were addressed                                        | 12<br>reference 24                                                                                                                                                                                |                  |
|                              | (d) If applicable, describe analytical methods taking account of sampling strategy | 11-13                                                                                                                                                                                             |                  |
|                              | (e) Describe any sensitivity analyses                                              | NA                                                                                                                                                                                                |                  |
| <b>Results</b>               |                                                                                    |                                                                                                                                                                                                   |                  |
| Participants                 | 13*                                                                                | (a) Report numbers of individuals at each stage of study—eg numbers potentially eligible, examined for eligibility, confirmed eligible, included in the study, completing follow-up, and analysed | 14               |
|                              |                                                                                    | (b) Give reasons for non-participation at each stage                                                                                                                                              | Figure 1         |
|                              |                                                                                    | (c) Consider use of a flow diagram                                                                                                                                                                | Figure 1         |
| Descriptive data             | 14*                                                                                | (a) Give characteristics of study participants (eg demographic, clinical, social) and information on exposures and potential confounders                                                          | 14-15<br>Table 1 |
|                              |                                                                                    | (b) Indicate number of participants with missing data for each variable of interest                                                                                                               | Figure 1         |

|                          |     |                                                                                                                                                                                                              |                                    |
|--------------------------|-----|--------------------------------------------------------------------------------------------------------------------------------------------------------------------------------------------------------------|------------------------------------|
| Outcome data             | 15* | Report numbers of outcome events or summary measures                                                                                                                                                         |                                    |
| Main results             | 16  | (a) Give unadjusted estimates and, if applicable, confounder-adjusted estimates and their precision (eg, 95% confidence interval). Make clear which confounders were adjusted for and why they were included | Table 3<br>(adjusted odds ratio)   |
|                          |     | (b) Report category boundaries when continuous variables were categorized                                                                                                                                    | Table 3                            |
|                          |     | (c) If relevant, consider translating estimates of relative risk into absolute risk for a meaningful time period                                                                                             | NA<br>(calculated only odds ratio) |
| Other analyses           | 17  | Report other analyses done—eg analyses of subgroups and interactions, and sensitivity analyses                                                                                                               | Table 3                            |
| <b>Discussion</b>        |     |                                                                                                                                                                                                              |                                    |
| Key results              | 18  | Summarise key results with reference to study objectives                                                                                                                                                     | 21-23                              |
| Limitations              | 19  | Discuss limitations of the study, taking into account sources of potential bias or imprecision. Discuss both direction and magnitude of any potential bias                                                   | 25-26                              |
| Interpretation           | 20  | Give a cautious overall interpretation of results considering objectives, limitations, multiplicity of analyses, results from similar studies, and other relevant evidence                                   | 21-23                              |
| Generalisability         | 21  | Discuss the generalisability (external validity) of the study results                                                                                                                                        | 21                                 |
| <b>Other information</b> |     |                                                                                                                                                                                                              |                                    |
| Funding                  | 22  | Give the source of funding and the role of the funders for the present study and, if applicable, for the original study on which the present article is based                                                | 27                                 |

\*Give information separately for exposed and unexposed groups.

**Note:** An Explanation and Elaboration article discusses each checklist item and gives methodological background and published examples of transparent reporting. The STROBE checklist is best used in conjunction with this article (freely available on the Web sites of PLoS Medicine at <http://www.plosmedicine.org/>, Annals of Internal Medicine at <http://www.annals.org/>, and Epidemiology at <http://www.epidem.com/>). Information on the STROBE Initiative is available at [www.strobe-statement.org](http://www.strobe-statement.org).
